# Supplementary material for: Towards [NiFe]-hydrogenase biomimetic models that couple H2 binding with functionally relevant intramolecular electron transfers: a quantum chemical study
Source: Royal Society of Chemistry journal article supplement (doi:10.1039/c3dt50836f), 2013-01-01
Supplement: c3dt50836f.pdf [file c3dt50836f.pdf]

**Supplementary Information for:**

**Towards [NiFe]-hydrogenase biomimetic models that couple H<sub>2</sub>  
binding with functionally relevant intramolecular electron  
transfers: a quantum chemical study**

Claudio Greco\*

*Humboldt-Universität zu Berlin, Institut für Chemie, Brook-Taylor str. 2, 12489 Berlin  
(Germany) and Università degli Studi di Milano Bicocca, Department of Environmental and  
Earth Sciences, Piazza della Scienza 1, 20126, Milano (Italy)*

## Section 1: Additional information on Ni-containing models of type c, c' and d

1.1 – Relative stabilities of **c** isomers featuring alternative orientation of cyanide, isocyanide and carbonyl groups coordinated to the Fe center in the Ni–Fe core.

Figure S1 reports a schematic representation of **c** and of the isomers of the latter (including **c'**) that feature the alternative possible disposition of ligands in the Fe first coordination sphere. For each isomer, the energy difference with respect to **c** is reported. As anticipated in the paper main text, **c'** is the only model the total energy of which is less than 3 kcal mol<sup>-1</sup> above the one of **c**.

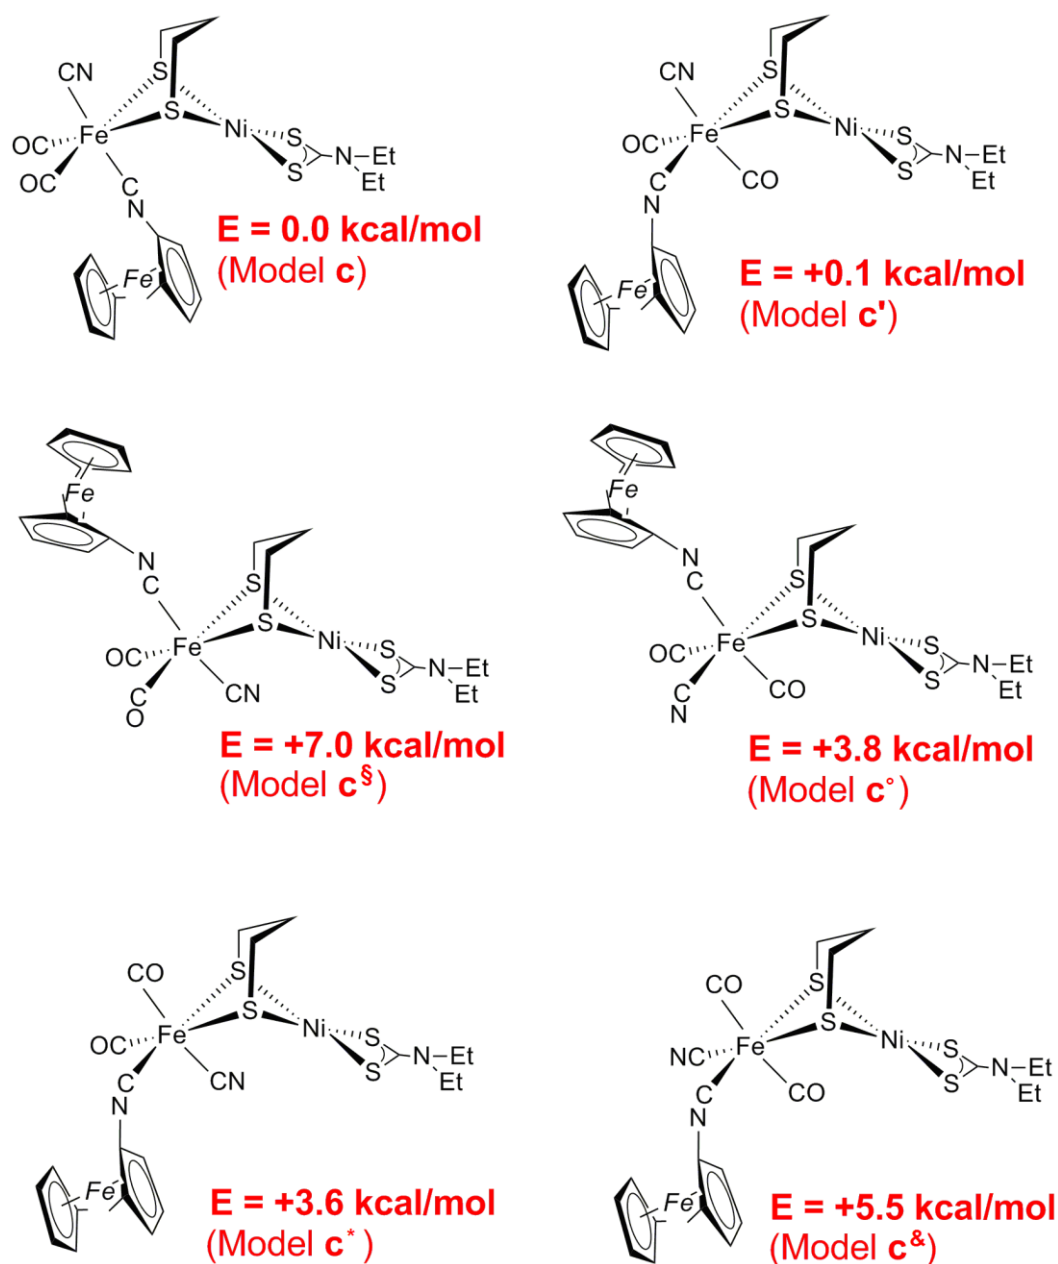

Figure S1.

## 1.2 – Optimized structures and reactivity of model **c'** and derivatives.

Figure S2 shows the optimized geometry of three minima (**c'**, [**c'**]<sup>+</sup> and [**c'**]<sup>+</sup>-H<sub>2</sub>) and one transition state ([**c'**]<sup>+</sup>-H<sub>2</sub>)<sup>‡</sup>. Mulliken population analyses show that **c'** features the *Fe(II)Fe(II)Ni(II)* state, see Table S1. Notably, side-on coordination of H<sub>2</sub> to the Ni center of **c** turned out to be not possible, as geometry optimizations of a complex of such kind invariably led to H<sub>2</sub> detachment along energy minimization. The one-electron oxidation of **c'** leads to [**c'**]<sup>+</sup>; notably, overall spin populations and charges of the two portions composing the model are consistent with the *Fe(III)Fe(II)Ni(II)* state for the cationic complex. This implies that the Ni–Fe site does not change redox state, in full analogy with what reported in the paper main text for the **c** → **c**<sup>+</sup> + e<sup>-</sup> oxidation.

Then, we optimized the dihydrogen complex [**c'**]<sup>+</sup>-H<sub>2</sub> (see Figure S2). Most notably, H<sub>2</sub> binding to [**c'**]<sup>+</sup> is associated with the oxidation of the Ni center at the expenses of the Fe ion in the metallocene sandwich, an intramolecular redox process similar to the one observed as a result of H<sub>2</sub> binding to **c**<sup>+</sup>. In fact – as reported in Table S1 – the spin population of the dinuclear site increases from 0.01 to 1.01 going from [**c'**]<sup>+</sup> to [**c'**]<sup>+</sup>-H<sub>2</sub>. The main contribution to such variation comes from the Ni ion (Mulliken spin population of Ni in [**c'**]<sup>+</sup> and [**c'**]<sup>+</sup>-H<sub>2</sub>: 0.00 and 1.10, respectively). Concomitantly, the overall spin population of the metallocene site drops from 0.97 to zero. As far as reaction energies are concerned, H<sub>2</sub> attachment to the Ni center of [**c'**]<sup>+</sup> is disfavored by 9.4 kcal mol<sup>-1</sup> (a value comparable to the one reported in the main text for the H<sub>2</sub>-binding reaction on model **c**<sup>+</sup>: 10.4 kcal mol<sup>-1</sup>). Finally, the [**c'**]<sup>+</sup> + H<sub>2</sub> → [**c'**]<sup>+</sup>-H<sub>2</sub> binding reaction is characterized by a rather small barrier (10.6 kcal mol<sup>-1</sup>, transition state [**c'**]<sup>+</sup>-H<sub>2</sub>)<sup>‡</sup> shown in Figure S2), again analogously to the case of dihydrogen binding to **c**<sup>+</sup> (see the paper main text).

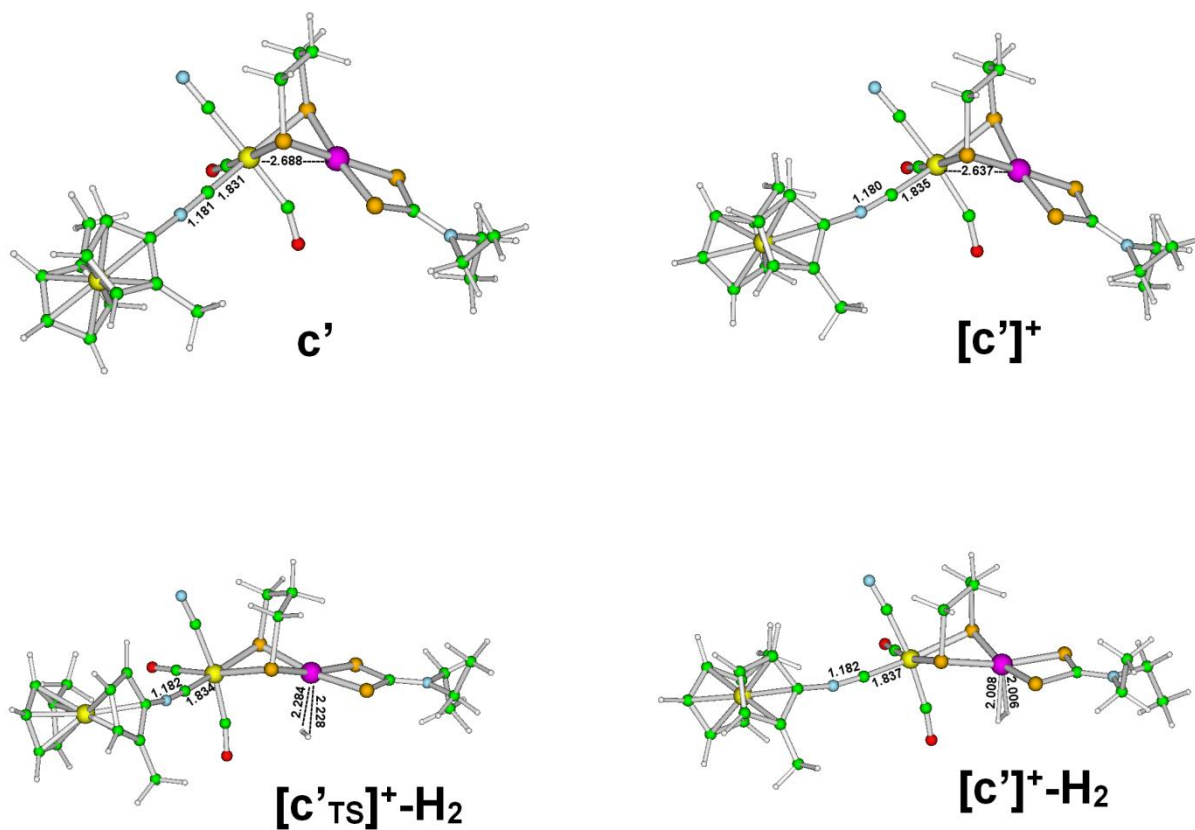

**Figure S2.** Ball-and-stick representation of models  $c'$ ,  $[c']^+$ ,  $[c'_{TS}]^+-H_2$ ,  $[c']^+-H_2$ . All interatomic distances in Å. Color code of atoms is the same as in Figure 4 (see main text of the paper). The singlet-triplet split for  $c'$  and the doublet-quartet split for  $[c']^+$  and  $[c']^+-H_2$  are: 14.8, 20.0 and 23.7 kcal mol<sup>-1</sup>, respectively.

### 1.3 – Optimized structures of the Ni-containing models featuring dtma as a bridging dithiolate

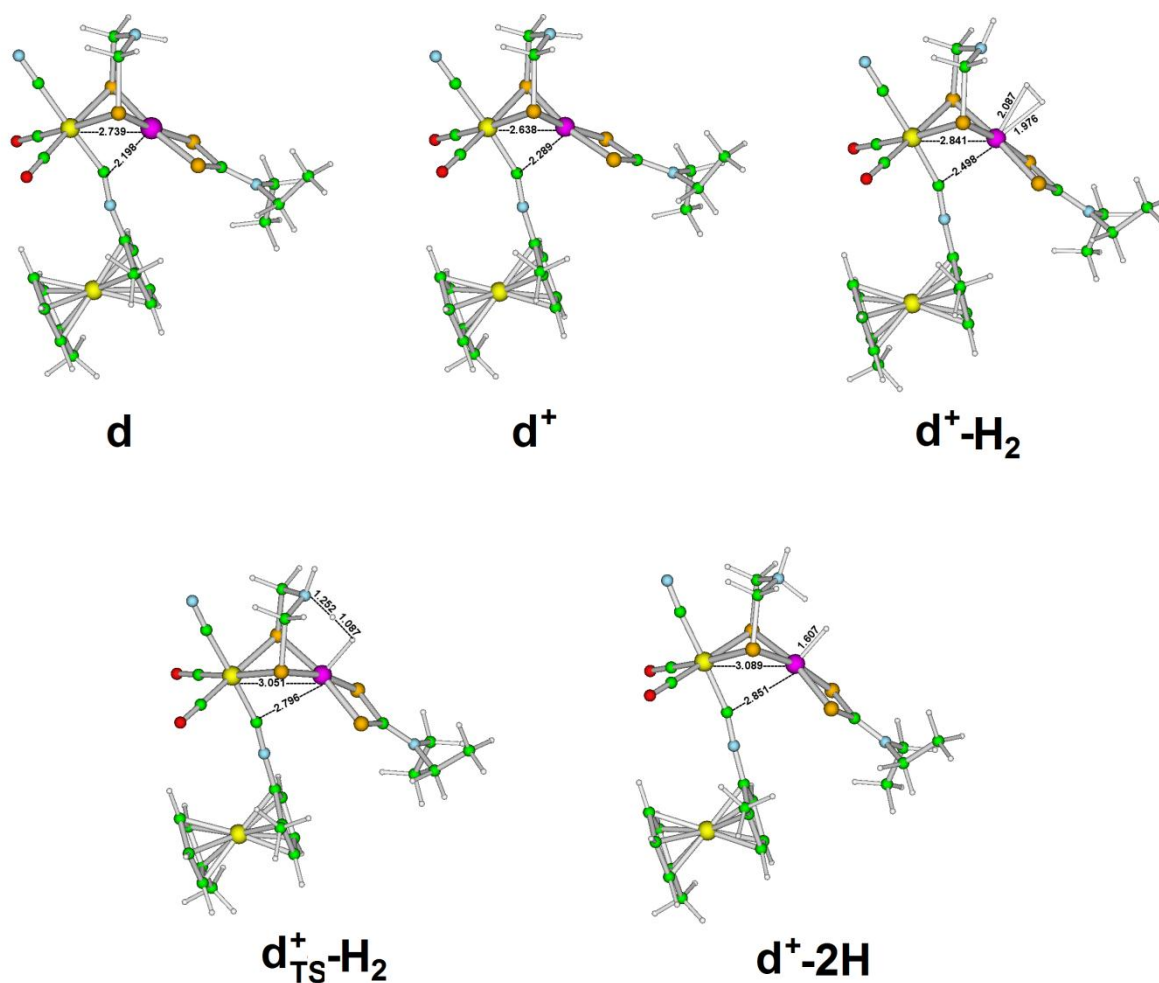

**Figure S3.** Ball-and-stick representation of models **d**, **d<sup>+</sup>**, **d<sup>+</sup>-H<sub>2</sub>**, **d<sup>+</sup><sub>TS</sub>-H<sub>2</sub>** and **d<sup>+</sup>-2H**. All interatomic distances in Å. Color code of atoms is the same as in Figure 4, see main text of the paper. The triplet state of **d**, as well as the quartets of the cationic models were also optimized (structures not shown). The singlet-triplet split for **d** and the doublet-quartet split for **d<sup>+</sup>**, **d<sup>+</sup>-H<sub>2</sub>** and **d<sup>+</sup>-2H** are: 14.1, 17.1, 19.3, and 19.9 kcal mol<sup>-1</sup>, respectively.

### 1.4 – Optimized structures of the Ni-containing models **e**, **e<sup>+</sup>** and **e<sup>+</sup>-2H**

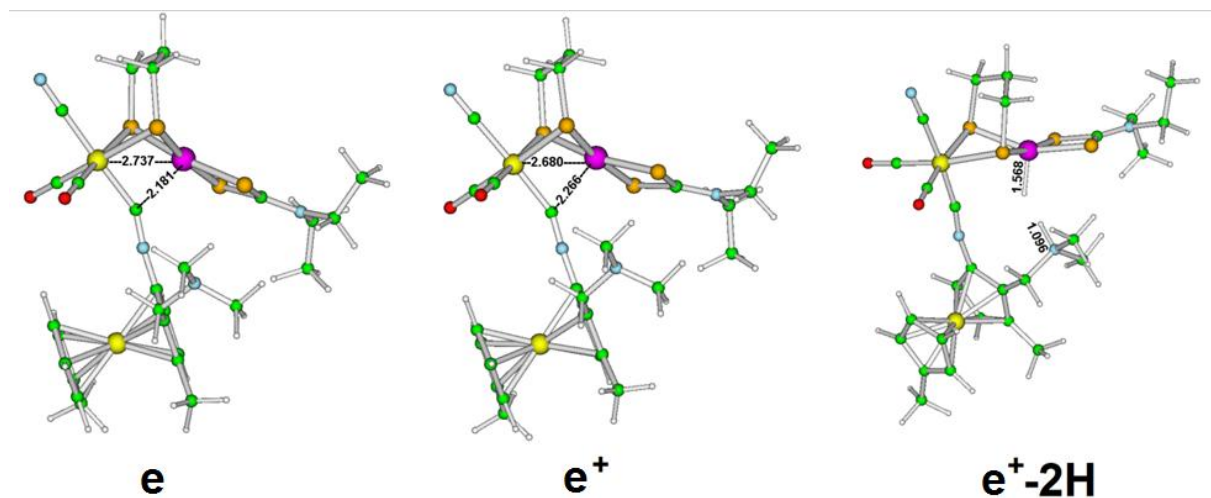

**Figure S4.** Ball-and-stick representation of models **e**, **e<sup>+</sup>** and **e<sup>+</sup>-2H**. All interatomic distances in Å. The triplet state of **e**, as well as the quartets of the cationic models were also optimized (structures not shown). The singlet-triplet split for **e** and the doublet-quartet split for **e<sup>+</sup>** and **e<sup>+</sup>-2H** are: 14.2, 17.1, 24.9 kcal mol<sup>-1</sup>, respectively.

**Table S1.** Overall Mulliken spin populations (and charges, in parenthesis) of the mononuclear and dinuclear portions composing **c'**, **[c']<sup>+</sup>**, **[c']<sup>+</sup>-H<sub>2</sub>**.

| Model                                 | Dinuclear portion | Mononuclear portion |
|---------------------------------------|-------------------|---------------------|
| <b>c'</b>                             | 0.00 (-0.07)      | 0.00 (0.07)         |
| <b>[c']<sup>+</sup></b>               | 0.01 (0.07)       | 0.97 (0.93)         |
| <b>[c']<sup>+</sup>-H<sub>2</sub></b> | 1.01 (0.80)       | -0.03 (0.20)        |

**Table S2.** Mulliken spin populations of the Ni and Fe centers in the dinuclear fragment (the latter indicated as Fe<sub>din</sub>), and of the ferrocene iron atom (Fe<sub>f</sub>) in selected Ni-containing trinuclear models.

| Model                                 | Ni   | Fe <sub>din</sub> | Fe <sub>f</sub> |
|---------------------------------------|------|-------------------|-----------------|
| <b>c</b>                              | 0.00 | 0.00              | 0.00            |
| <b>c<sup>+</sup></b>                  | 0.02 | 0.03              | 1.20            |
| <b>c<sup>+</sup>-H<sub>2</sub></b>    | 1.08 | 0.00              | 0.00            |
|                                       |      |                   |                 |
| <b>c'</b>                             | 0.00 | 0.00              | 0.00            |
| <b>[c']<sup>+</sup></b>               | 0.00 | 0.01              | 1.24            |
| <b>[c']<sup>+</sup>-H<sub>2</sub></b> | 1.10 | 0.00              | -0.03           |
|                                       |      |                   |                 |
| <b>d</b>                              | 0.00 | 0.00              | 0.00            |
| <b>d<sup>+</sup></b>                  | 0.08 | 0.00              | 1.19            |
| <b>d<sup>+</sup>-H<sub>2</sub></b>    | 0.92 | 0.03              | 0.08            |
| <b>d<sup>+</sup>-2H</b>               | 0.63 | 0.01              | 0.01            |
|                                       |      |                   |                 |
| <b>e</b>                              | 0.00 | 0.00              | 0.00            |
| <b>e<sup>+</sup></b>                  | 0.16 | -0.03             | 1.16            |
| <b>e<sup>+</sup>-2H</b>               | 0.72 | 0.00              | 0.00            |

## **Section 2: Results of dispersion-corrected calculations**

### 2.1 – Optimization of model <sup>disp</sup>**b<sup>-</sup>** and comparison between experimental and computed structural and vibrational parameters

Starting from the crystal structure of **B<sup>-</sup>**, we performed a geometry optimization at BP86/TZVP calculation using dispersion-corrected DFT (see Methods in the paper main text). The model thus obtained is <sup>disp</sup>**b<sup>-</sup>** (Cartesian coordinates reported below, relevant bonding interactions in Table S3). We also optimized the corresponding triplet (structure not shown), and the computed singlet-triplet splitting is found to be 10.8 kcal mol<sup>-1</sup>. Such  $\Delta E$  is fully consistent with the 9.8 kcal mol<sup>-1</sup> singlet-triplet energy splitting reported in the paper main text for model **b<sup>-</sup>**. A comparison between the computed and X-ray geometries for <sup>disp</sup>**b<sup>-</sup>** evidences a very good match (see Table S3), with most of the bond distances reproduced with deviations below 0.03 Å, and a maximum deviation of 0.06 Å for one of the Fe–S bonds. The non-bonded Fe–Ni interaction is very well reproduced (3.03 Å in <sup>disp</sup>**b<sup>-</sup>**, with a deviation of 0.03 Å from crystallographic data).

Vibrational frequencies of the CN<sup>-</sup> groups were computed, and the overall agreement with experimental values is acceptable (2110 and 2094 cm<sup>-1</sup> in experiments; theoretical values at 2107 and 2122 cm<sup>-1</sup>). As for the two carbonyl groups, the theoretical IR signals are located at 2014 and 1968 cm<sup>-1</sup>; such frequencies are exactly the same as the one of the CO vibrational

modes in model  $\mathbf{b}^-$ , and can therefore be compared to experiments in an analogous way (see the paper main text). The above results show general consistency between the dispersion-corrected BP86/TZVP calculations and experiments.

**Table S3.** Comparison between experimental metal-to-ligand bond lengths in the Ni–Fe model  $\mathbf{B}^-$  and the corresponding theoretical values in  $\text{disp}\mathbf{b}^-$ . All values in Å.

| Bond  | Experimental length        | Theoretical length         |
|-------|----------------------------|----------------------------|
| Ni–S  | 2.215, 2.198, 2.214, 2.211 | 2.218, 2.251, 2.259, 2.219 |
| Fe–S  | 2.331, 2.343               | 2.393, 2.395               |
| Fe–CO | 1.783, 1.793               | 1.764, 1.765               |
| Fe–CN | 1.924, 1.929               | 1.926, 1.960               |

## 2.2 – Reactivity of model $\text{disp}\mathbf{b}^-$ to dihydrogen

We then evaluated the stability of a complex between dihydrogen and  $\text{disp}\mathbf{b}^-$ . In particular, direct coordination of  $\text{H}_2$  with the Ni center was considered in our starting geometries for energy minimizations, in full analogy to the case of model  $\mathbf{b}^-$  (see paper main text and in particular Scheme 2). Ni– $\text{H}_2$  coordination does not appear to correspond to any possible minimum on the singlet potential energy surface:  $\text{H}_2$  invariably detaches along geometry optimization. In the case of the triplet, the complex turned out to be a stationary point (structure not shown), but the binding reaction is largely disfavored (+19.3 kcal mol<sup>-1</sup>, a value to be compared with the 29.1 kcal mol<sup>-1</sup> energy difference reported in the paper main text in the case of DFT calculations without dispersion corrections).

## 2.3 – Dispersion-corrected DFT calculations on models including 1-isocyano-2,1'-dimethylferrocene

The substitution of one cyanide group with 1-isocyano-2,1'-dimethylferrocene in  $\text{disp}\mathbf{b}^-$  gives place to model  $\text{disp}\mathbf{c}$  (Cartesian coordinates reported below). Optimization of models featuring the alternative disposition of isocyanide, cyanide and carbonyl groups in the Fe ion coordination sphere showed that model  $\text{disp}\mathbf{c}$  is the lowest minimum of the investigated potential energy surface (the disposition of ligands around metal centers in the alternative models  $\text{disp}\mathbf{c}'$ ,  $\text{disp}\mathbf{c}^\S$ ,  $\text{disp}\mathbf{c}^\circ$ ,  $\text{disp}\mathbf{c}^*$ ,  $\text{disp}\mathbf{c}^\&$  is the same as the one represented in Figure S1 for models  $\mathbf{c}'$ ,  $\mathbf{c}^\S$ ,  $\mathbf{c}^\circ$ ,  $\mathbf{c}^*$ ,  $\mathbf{c}^\&$ , respectively. See Figure S5 for details and energy differences). Therefore, in the following we will consider  $\text{disp}\mathbf{c}$  as our reference point for theoretical study of reactivity towards  $\text{H}_2$ . However, it has to be remarked that one of the alternative structures – the one showing the  $\text{CN}^-$  group trans to one of the carbonyl ligand, and the isocyanide coordinated trans to one of the S atom of the propanedithiolate (pdt) ligand, see model  $\text{disp}\mathbf{c}'$  in Figure S5 – is relatively closer in energy to  $\text{disp}\mathbf{c}$  ( $\Delta E = +3.8$  kcal mol<sup>-1</sup>). Therefore, in the final part of the present subsection we report a detailed study on the former isomer, the reactivity of which is however similar to the one reported in the next lines for  $\text{disp}\mathbf{c}$ .

Mulliken population analyses show that  $\text{disp}\mathbf{c}$  features  $Fe(II)Fe(II)Ni(II)$  state, see Table S4. As for the singlet-triplet energy splitting, the former state is favored by 15.8 kcal mol<sup>-1</sup>, a value very close to the corresponding splitting calculated for model  $\mathbf{c}$  (15.2 kcal mol<sup>-1</sup>, see paper main text).



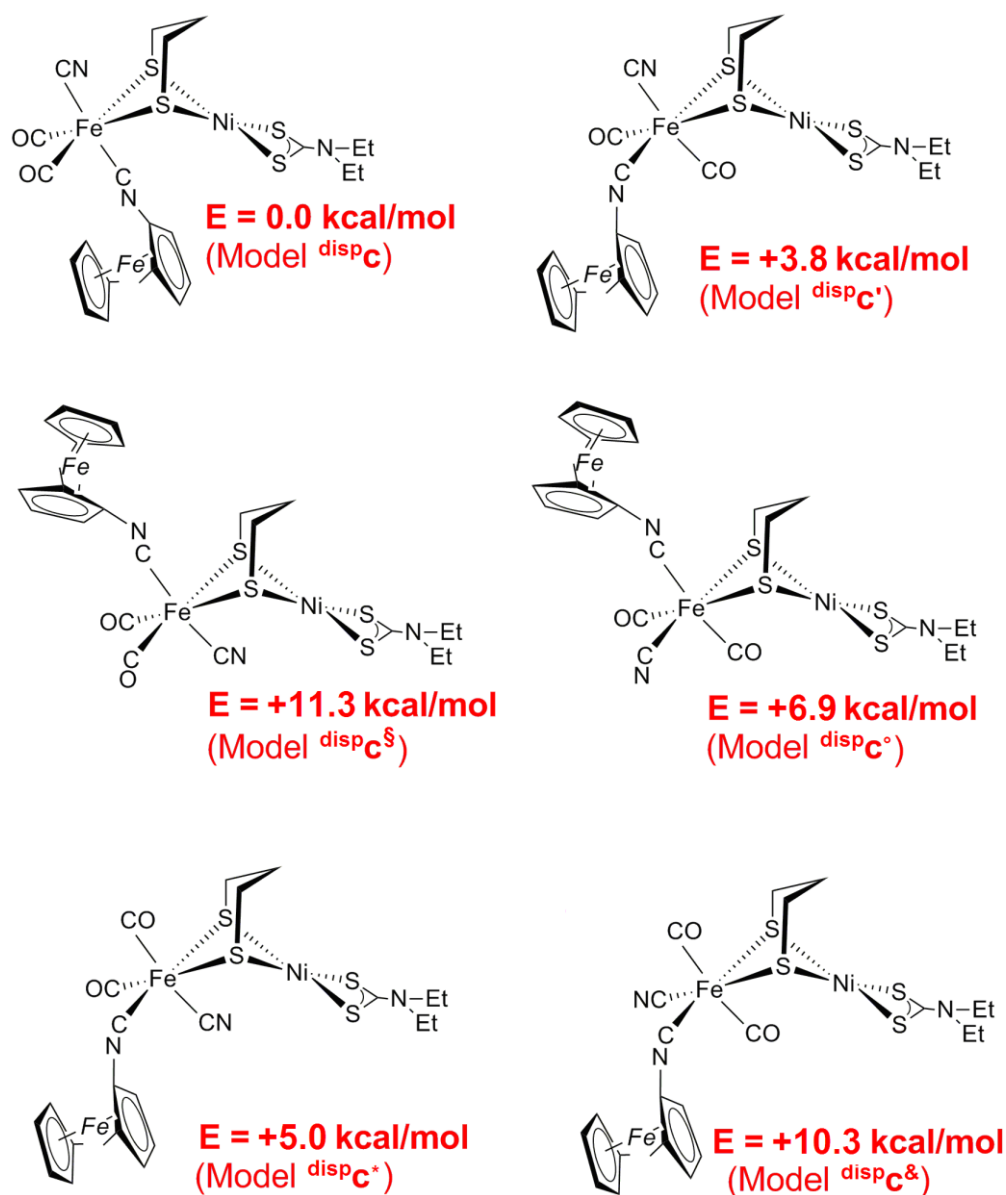

Figure S5

The one-electron oxidation of  $^{disp}c$  leads to  $^{disp}c^+$  (Cartesian coordinates of the model reported below); notably, overall spin populations and charges of the two portions composing the model indicate the  $Fe(III)Fe(II)Ni(II)$  state for the cationic complex. This implies that the Ni-Fe site does not change redox state, as oxidation mainly involves the metallocene fragment (see Table S4 for Mulliken charges of the two portions, and compare Table S4 with Table 3 in the paper main text to appreciate the consistency with DFT results obtained without dispersion corrections). Then, we optimized the dihydrogen complex  $^{disp}c^+-H_2$  (Cartesian coordinates of the model reported below): analogously to model  $c^+-H_2$  (see Figure 4 in the paper main text), the dihydrogen complex  $^{disp}c^+-H_2$  is a minimum on the dispersion-corrected potential energy surface. Not differently from the case of  $H_2$  binding to  $c^+$  (see main text), the interaction between  $^{disp}c^+$  and dihydrogen is associated with the oxidation of the Ni center at the expenses of the Fe ion in the metallocene sandwich. In fact, as reported in Table S4 the spin population of the dinuclear site increases from 0.07 to 0.99 going from  $^{disp}c^+$  to  $^{disp}c^+-H_2$ ,

with the main contribution to such variation coming from the Ni ion (Mulliken spin population of Ni in  $\text{disp}\mathbf{c}^+$  and  $\text{disp}\mathbf{c}^+-\mathbf{H}_2$ : 0.02 and 1.05, respectively, see Table S5). Concomitantly, the overall spin population of the metallocene site drops from 0.92 to zero. As far as reaction energies are concerned,  $\text{H}_2$  attachment to the Ni center of  $\text{disp}\mathbf{c}^+$  is disfavored by 10.1 kcal mol<sup>-1</sup> (an energy difference very close to the one computed without dispersion corrections: 10.4 kcal mol<sup>-1</sup>, see paper main text); the  $\text{disp}\mathbf{c}^+ + \text{H}_2 \rightarrow \text{disp}\mathbf{c}^+-\mathbf{H}_2$  binding reaction is characterized by a rather small barrier (10.8 kcal mol<sup>-1</sup>, Cartesian coordinates of the transition state  $\text{disp}\mathbf{c}_{\text{TS}}^+-\mathbf{H}_2$  reported below), not differently from the results obtained for the  $\mathbf{c}^+ + \text{H}_2 \rightarrow \mathbf{c}^+-\mathbf{H}_2$  transformation (see main text).

Finally, we analyze the reactivity of model  $\text{disp}\mathbf{c}'$  (Figure S5; Cartesian coordinates below). Mulliken population analyses show that  $\text{disp}\mathbf{c}'$  features the *Fe(II)Fe(II)Ni(II)* state, see Table S4. The one-electron oxidation of  $\text{disp}\mathbf{c}'$  leads to  $\text{disp}[\mathbf{c}']^+$  (Cartesian coordinates below); notably, overall spin populations and charges of the two portions composing the model are consistent with the *Fe(III)Fe(II)Ni(II)* state for the cationic complex. This implies that the Ni-Fe site does not change redox state, in full analogy with what reported in the paper main text for the  $\mathbf{c} \rightarrow \mathbf{c}^+ + \text{e}^-$  oxidation, and with the data in Table S1 for the  $\mathbf{c}' \rightarrow [\mathbf{c}']^+ + \text{e}^-$  oxidation.

Then, we optimized the dihydrogen complex  $\text{disp}[\mathbf{c}']^+-\mathbf{H}_2$  (Cartesian coordinates below; the model has the same connectivity as the one of  $[\mathbf{c}']^+-\mathbf{H}_2$  in Figure S2). Most notably,  $\text{H}_2$  binding to  $\text{disp}[\mathbf{c}']^+$  is associated with the oxidation of the Ni center at the expenses of the Fe ion in the metallocene sandwich, an intramolecular redox process similar to the one observed as a result of  $\text{H}_2$  binding to  $\mathbf{c}^+$  and  $[\mathbf{c}']^+$  (see main text and see above). In fact – as reported in Table S4 – the spin population of the dinuclear site increases from 0.04 to 1.00 going from  $\text{disp}[\mathbf{c}']^+$  to  $\text{disp}[\mathbf{c}']^+-\mathbf{H}_2$ . The main contribution to such variation comes from the Ni ion (Mulliken spin population of Ni in  $\text{disp}[\mathbf{c}']^+$  and  $\text{disp}[\mathbf{c}']^+-\mathbf{H}_2$ : 0.00 and 1.07, respectively). Concomitantly, the overall spin population of the metallocene site drops from 0.98 to -0.02. As far as reaction energies are concerned,  $\text{H}_2$  attachment to the Ni center of  $\text{disp}[\mathbf{c}']^+$  is disfavored by 7.9 kcal mol<sup>-1</sup> (a value comparable with the one above reported for the  $\text{H}_2$ -binding reaction on model  $[\mathbf{c}']^+$ : 9.4 kcal mol<sup>-1</sup>). Finally, the  $\text{disp}[\mathbf{c}']^+ + \text{H}_2 \rightarrow \text{disp}[\mathbf{c}']^+-\mathbf{H}_2$  binding reaction is characterized by a rather small barrier (8.3 kcal mol<sup>-1</sup>, Cartesian coordinates of the transition state  $\text{disp}[\mathbf{c}'_{\text{TS}}]^+-\mathbf{H}_2$  reported below), again analogously to the case of dihydrogen binding to  $[\mathbf{c}']^+$  (see above).

## 2.4 – Dispersion-corrected DFT calculations on models including a basic group functional for $\text{H}_2$ splitting

Models analogous to the  $\mathbf{d}$  and  $\mathbf{e}$  ones presented in the paper main text were reoptimized here using dispersion corrections. As for the first group of models, we optimized  $\text{disp}\mathbf{d}$ ,  $\text{disp}\mathbf{d}^+$ ,  $\text{disp}\mathbf{d}^+-\mathbf{H}_2$  and  $\text{disp}\mathbf{d}^+-2\mathbf{H}$ : the sketches in Scheme 4 (see paper main text) for models without dispersive corrections well represent also these dispersion-corrected models. Let us consider the case of model  $\text{disp}\mathbf{d}$  first; computed Mulliken charges reported in Table S4 indicate that  $\text{disp}\mathbf{d}$  features the *Fe(II)Fe(II)Ni(II)* state, while in the corresponding monocation  $\text{disp}\mathbf{d}^+$  the iron center of the metallocene is ferric.  $\text{H}_2$  binding to the free Ni coordination site facing the dtma pendant triggers oxidation of the nickel ion at the expenses of the isocyanoferrocene (compare Mulliken populations of  $\text{disp}\mathbf{d}^+-\mathbf{H}_2$  and  $\text{disp}\mathbf{d}^+$  in Table S4), in full analogy to the case

of dihydrogen binding to  $\mathbf{d}^+$  (see paper main text, Table 3). The  $\text{disp}\mathbf{d}^+ + \text{H}_2 \rightarrow \text{disp}\mathbf{d}^+-\text{H}_2$  reaction is disfavored, not differently from the case of the transformation  $\mathbf{d}^+ + \text{H}_2 \rightarrow \mathbf{d}^+-\text{H}_2$  presented in the paper main text; however, the difference between  $\Delta E$  values is not negligible in this case:  $+3.5 \text{ kcal mol}^{-1}$  in the dispersion-corrected calculation vs. the  $+9.8 \text{ kcal mol}^{-1}$  energy difference reported in the main text for DFT without dispersion corrections. The path for dihydrogen splitting on  $\text{disp}\mathbf{d}^+-\text{H}_2$  features a barrier as low as  $+3.5 \text{ kcal mol}^{-1}$  (Cartesian coordinates of transition state structure  $\text{disp}\mathbf{d}_{\text{TS}}^+-\text{H}_2$  reported below; notice that the barrier computed without using dispersion correction is  $+3.1 \text{ kcal mol}^{-1}$ , see paper main text). The product of the  $\text{disp}\mathbf{d}^+-\text{H}_2 \rightarrow \text{disp}\mathbf{d}^+-2\text{H}$  reaction is less stable than the reactant; however, the energy difference is rather small:  $+2.1 \text{ kcal mol}^{-1}$  (a value very close to the one reported in the main text for the corresponding DFT calculations without dispersion corrections:  $+2.9 \text{ kcal mol}^{-1}$ ).

Finally, as far as model of the  $\mathbf{e}$  class are concerned, we carried out dispersion-corrected DFT optimizations of models analogous to the ones reported in Scheme 5 in the paper main text. The Cartesian coordinates of the obtained stationary points ( $\text{disp}\mathbf{e}^+$  and  $\text{disp}\mathbf{e}^+-2\text{H}$ ) are reported below. As represented in Scheme 5, when optimization of an  $\text{H}_2$ -bound version of  $\text{disp}\mathbf{e}^+$  was attempted, heterolytic splitting of  $\text{H}_2$  occurred along minimization leading to the terminal-hydride model  $\text{disp}\mathbf{e}^+-2\text{H}$ ; such picture is fully consistent with the one described in the paper main text for models optimized without dispersion corrections. However, the binding reaction computed with dispersion correction is significantly more favored ( $\Delta E = -7.3 \text{ kcal mol}^{-1}$ ) as compared to the same transformation computed without such corrections ( $\Delta E = +0.9 \text{ kcal mol}^{-1}$ , see paper main text).

**Table S4.** Overall Mulliken spin populations (and charges, in parenthesis) of the mononuclear and dinuclear portions composing each of the selected nickel-iron models

| Model                                   | Dinuclear portion | Mononuclear portion |
|-----------------------------------------|-------------------|---------------------|
| $\text{disp}\mathbf{c}$                 | 0.00 (0.06)       | 0.00 (-0.06)        |
| $\text{disp}\mathbf{c}^+$               | 0.07 (0.28)       | 0.92 (0.72)         |
| $\text{disp}\mathbf{c}^+-\text{H}_2$    | 0.99 (0.84)       | 0.00 (0.15)         |
|                                         |                   |                     |
| $\text{disp}\mathbf{c}'$                | 0.00 (-0.09)      | 0.00 (0.09)         |
| $\text{disp}[\mathbf{c}']^+$            | 0.04 (0.09)       | 0.98 (0.91)         |
| $\text{disp}[\mathbf{c}']^+-\text{H}_2$ | 1.00 (0.79)       | -0.02 (0.21)        |
|                                         |                   |                     |
| $\text{disp}\mathbf{d}$                 | 0.00 (0.07)       | 0.00 (-0.07)        |
| $\text{disp}\mathbf{d}^+$               | 0.09 (0.22)       | 0.92 (0.78)         |
| $\text{disp}\mathbf{d}^+-\text{H}_2$    | 0.86 (0.73)       | 0.09 (0.12)         |
| $\text{disp}\mathbf{d}^+-2\text{H}$     | 0.98 (0.93)       | 0.02 (0.06)         |
|                                         |                   |                     |
| $\text{disp}\mathbf{e}$                 | 0.00 (0.03)       | 0.00 (-0.03)        |
| $\text{disp}\mathbf{e}^+$               | 0.14 (0.29)       | 0.87 (0.71)         |
| $\text{disp}\mathbf{e}^+-2\text{H}$     | 0.09 (0.22)       | 0.06 (0.78)         |

**Table S5.** Mulliken spin populations of the Ni and Fe centers in the dinuclear fragment (the latter indicated as Fe<sub>din</sub>), and of the ferrocene iron atom (Fe<sub>f</sub>) in selected Ni-containing trinuclear models.<sup>a</sup>

| Model                                           | Ni   | Fe <sub>din</sub> | Fe <sub>f</sub> |
|-------------------------------------------------|------|-------------------|-----------------|
| disp <b>c</b>                                   | 0.00 | 0.00              | 0.00            |
| disp <b>c</b> <sup>+</sup>                      | 0.02 | 0.03              | 1.16            |
| disp <b>c</b> <sup>+</sup> -H <sub>2</sub>      | 1.05 | 0.00              | 0.00            |
|                                                 |      |                   |                 |
| disp <b>c</b> '                                 | 0.00 | 0.00              | 0.00            |
| disp [ <b>c</b> '] <sup>+</sup>                 | 0.00 | 0.04              | 1.20            |
| disp [ <b>c</b> '] <sup>+</sup> -H <sub>2</sub> | 1.07 | 0.00              | -0.03           |
|                                                 |      |                   |                 |
| disp <b>d</b>                                   | 0.00 | 0.00              | 0.00            |
| disp <b>d</b> <sup>+</sup>                      | 0.09 | 0.00              | 1.16            |
| disp <b>d</b> <sup>+</sup> -H <sub>2</sub>      | 0.86 | 0.03              | 0.08            |
| disp <b>d</b> <sup>+</sup> -2H                  | 0.62 | 0.01              | 0.02            |
|                                                 |      |                   |                 |
| disp <b>e</b>                                   | 0.00 | 0.00              | 0.00            |
| disp <b>e</b> <sup>+</sup>                      | 0.17 | -0.03             | 1.12            |
| disp <b>e</b> <sup>+</sup> -2H                  | 0.70 | 0.00              | 0.00            |

<sup>a</sup> Notably, the reported spin populations never differ by more than 0.06 spin units from those computed in models optimized without dispersion correction (see Table S2)

### **Section 3: Results of calculations carried out with the COSMO continuum solvent model**

In the case of calculations performed by using the COSMO continuum solvent model, vibrational frequencies cannot be computed analytically within TURBOMOLE. Therefore, vibrational spectra have not been computed in the case of COSMO-solvated models, and also the eigenvector-following approach mentioned in Methods for transition states location could not be applied. Geometry optimization of intermediates was carried out for all the models that were above considered for dispersion-corrected optimizations, while calculation of reaction barriers have been performed by simply carrying out a single point SCF calculation with COSMO at the geometry of reactants and transition states optimized in vacuo (see main text and section 1 of the supplementary information), and then using the obtained total energy values for computation of energy differences.

#### **3.1 – Optimization of model <sup>solv</sup>**b**<sup>-</sup> and comparison between experimental and computed structural parameters**

Starting from the crystal structure of **B**<sup>-</sup>, we performed a geometry optimization at BP86/TZVP calculation using the COSMO continuum model for dichloromethane solvent (see Methods in the paper main text). The model thus obtained is <sup>solv</sup>**b**<sup>-</sup> (Cartesian coordinates reported below, relevant bonding interactions in Table S6). We also optimized the

corresponding triplet (structure not shown), and the computed singlet-triplet splitting is found to be 12.0 kcal mol<sup>-1</sup>. Such  $\Delta E$  is close to the 9.8 kcal mol<sup>-1</sup> singlet-triplet energy splitting reported in the paper main text for model **b**<sup>-</sup>. A comparison between the computed and X-ray geometries for <sup>solv</sup>**b**<sup>-</sup> evidences a very good match (see Table S6), with most of the bond distances reproduced with deviations below 0.03 Å, and a maximum deviation of 0.06 Å for one of the Fe–S bonds. The non-bonded Fe–Ni interaction is also reasonably well reproduced (2.97 Å in <sup>disp</sup>**b**<sup>-</sup>, with a deviation of 0.09 Å from crystallographic data).

**Table S6.** Comparison between experimental metal-to-ligand bond lengths in the Ni–Fe model **B**<sup>-</sup> and the corresponding theoretical values in <sup>solv</sup>**b**<sup>-</sup>. All values in Å.

| Bond  | Experimental length        | Theoretical length         |
|-------|----------------------------|----------------------------|
| Ni–S  | 2.215, 2.198, 2.214, 2.211 | 2.221, 2.255, 2.257, 2.220 |
| Fe–S  | 2.331, 2.343               | 2.386, 2.387               |
| Fe–CO | 1.783, 1.793               | 1.765, 1.765               |
| Fe–CN | 1.924, 1.929               | 1.924, 1.959               |

### 3.2 – Reactivity of model <sup>solv</sup>**b**<sup>-</sup> to dihydrogen

We then evaluated the stability of a complex between dihydrogen and <sup>solv</sup>**b**<sup>-</sup>. In particular, direct coordination of H<sub>2</sub> with the Ni center was considered in our starting geometries for energy minimizations, in full analogy to the case of model **b**<sup>-</sup> (see paper main text and in particular Scheme 2). Ni–H<sub>2</sub> coordination does not appear to correspond to any possible minimum on the singlet potential energy surface: H<sub>2</sub> invariably detaches along geometry optimization. In the case of the triplet, the complex turned out to be a stationary point (structure not shown), but the binding reaction is largely disfavored (+23.6 kcal mol<sup>-1</sup>, a value to be compared with the 29.1 kcal mol<sup>-1</sup> energy difference reported in the paper main text in the case of DFT calculations without continuum solvent model).

### 3.3 – COSMO-soaked DFT optimizations on models including 1-isocyano-2,1'-dimethylferrocene

The substitution of one cyanide group with 1-isocyano-2,1'-dimethylferrocene in <sup>solv</sup>**b**<sup>-</sup> gives place to model <sup>solv</sup>**c** (Cartesian coordinates reported below). Optimization of models featuring the alternative disposition of isocyanide, cyanide and carbonyl groups in the Fe ion coordination sphere showed that model <sup>solv</sup>**c** and <sup>solv</sup>**c'** are significantly more stable than all the other models, while the energy difference between them is very small (0.1 kcal mol<sup>-1</sup>), in full analogy with what reported in the paper main text for models **c** and **c'**, optimized *in vacuo* (the disposition of ligands around metal centers in the alternative models <sup>solv</sup>**c'**, <sup>solv</sup>**c**<sup>§</sup>, <sup>solv</sup>**c**<sup>°</sup>, <sup>solv</sup>**c**<sup>\*</sup>, <sup>solv</sup>**c**<sup>&</sup> is the same as the one represented in Figure S1 for models **c'**, **c**<sup>§</sup>, **c**<sup>°</sup>, **c**<sup>\*</sup>, **c**<sup>&</sup>, respectively. See Figure S6 for details and energy differences). In the next lines we will discuss calculations on the reactivity of <sup>solv</sup>**c**, while later in this subsection we will also consider model <sup>solv</sup>**c'** in more details.

Mulliken population analyses show that <sup>solv</sup>**c** features *Fe(II)Fe(II)Ni(II)* state, see Table S7. As for the singlet-triplet energy splitting, the former state is favored by 15.4 kcal mol<sup>-1</sup>, a value very close to the corresponding splitting calculated for model **c** (15.2 kcal mol<sup>-1</sup>, see paper main text).

**Table S7.** Overall Mulliken spin populations (and charges, in parenthesis) of the mononuclear and dinuclear portions composing each of the selected nickel-iron COSMO-soaked models.

| <b>Model</b>                               | <b>Dinuclear portion</b> | <b>Mononuclear portion</b> |
|--------------------------------------------|--------------------------|----------------------------|
| <b>solv c</b>                              | 0.00 (-0.05)             | 0.00 (0.05)                |
| <b>solv c<sup>+</sup></b>                  | 0.00 (0.12)              | 0.98 (0.88)                |
| <b>solv c<sup>+</sup>-H<sub>2</sub></b>    | 0.98 (0.87)              | 0.00 (0.13)                |
|                                            |                          |                            |
| <b>solv c'</b>                             | 0.00 (-0.10)             | 0.00 (0.10)                |
| <b>solv [c']<sup>+</sup></b>               | 0.01 (0.01)              | 0.99 (0.99)                |
| <b>solv [c']<sup>+</sup>-H<sub>2</sub></b> | 0.99 (0.85)              | 0.00 (0.15)                |
|                                            |                          |                            |
| <b>solv d</b>                              | 0.00 (-0.06)             | 0.00 (0.06)                |
| <b>solv d<sup>+</sup></b>                  | 0.00 (0.00)              | 0.98 (1.00)                |
| <b>solv d<sup>+</sup>-2H</b>               | 1.01 (0.87)              | 0.01 (0.13)                |
|                                            |                          |                            |
| <b>solv e</b>                              | 0.00 (-0.04)             | 0.00 (0.04)                |
| <b>solv e<sup>+</sup></b>                  | 0.03 (0.12)              | 0.97 (0.88)                |
| <b>solv e<sup>+</sup>-2H</b>               | 0.91 (0.14)              | 0.06 (0.86)                |

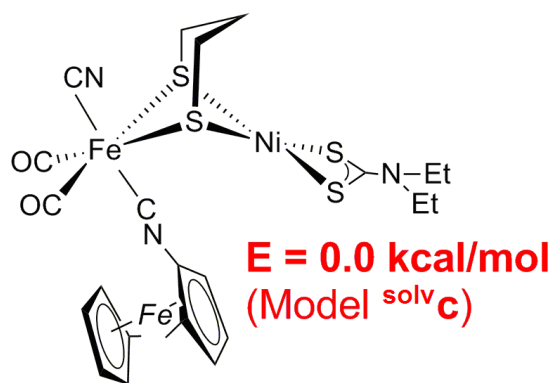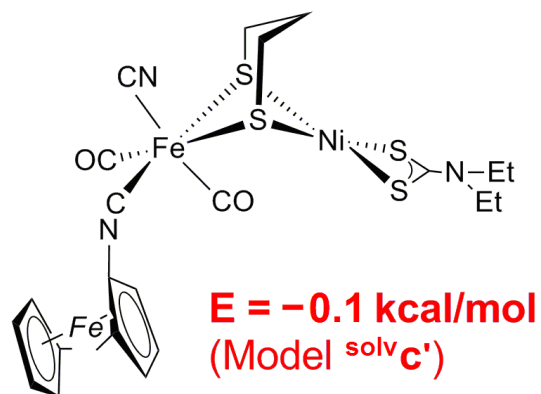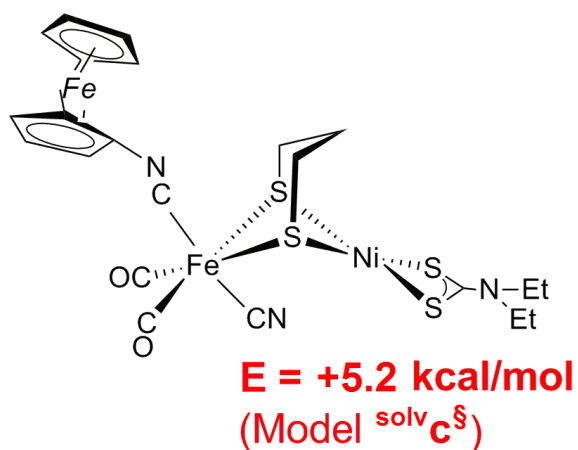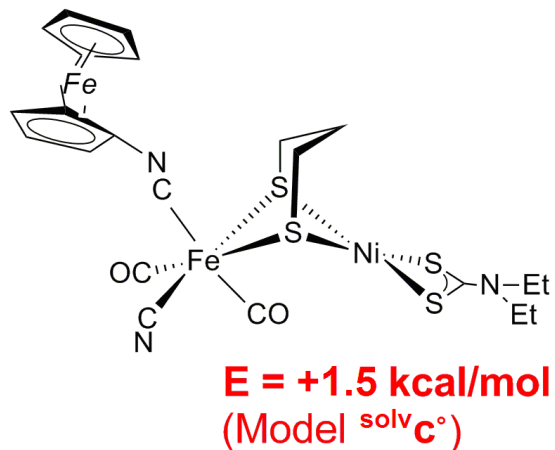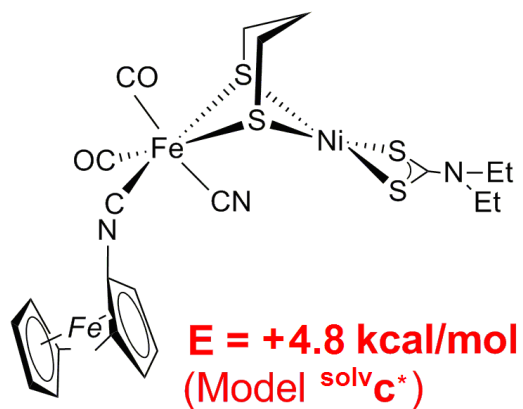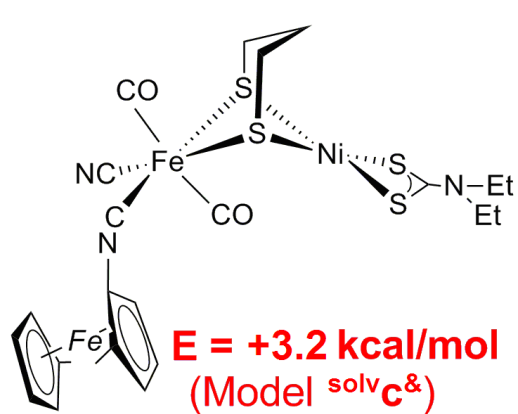

Figure S6



**Table S8.** Mulliken spin populations of the Ni and Fe centers in the dinuclear fragment (the latter indicated as Fe<sub>din</sub>), and of the ferrocene iron atom (Fe<sub>f</sub>) in selected Ni-containing COSMO-soaked trinuclear models.<sup>a</sup>

| Model                                                              | Ni   | Fe <sub>din</sub> | Fe <sub>f</sub> |
|--------------------------------------------------------------------|------|-------------------|-----------------|
| <sup>solv</sup> <b>c</b>                                           | 0.00 | 0.00              | 0.00            |
| <sup>solv</sup> <b>c</b> <sup>+</sup>                              | 0.00 | 0.00              | 1.27            |
| <sup>solv</sup> <b>c</b> <sup>+</sup> - <b>H</b> <sub>2</sub>      | 1.07 | 0.00              | 0.00            |
|                                                                    |      |                   |                 |
| <sup>solv</sup> <b>c</b> '                                         | 0.00 | 0.00              | 0.00            |
| <sup>solv</sup> [ <b>c</b> '] <sup>+</sup>                         | 0.00 | 0.01              | 1.25            |
| <sup>solv</sup> [ <b>c</b> '] <sup>+</sup> - <b>H</b> <sub>2</sub> | 1.09 | 0.00              | 0.00            |
|                                                                    |      |                   |                 |
| <sup>solv</sup> <b>d</b>                                           | 0.00 | 0.00              | 0.00            |
| <sup>solv</sup> <b>d</b> <sup>+</sup>                              | 0.00 | 0.00              | 1.26            |
| <sup>solv</sup> <b>d</b> <sup>+</sup> - <b>2H</b>                  | 0.58 | 0.01              | 0.01            |
|                                                                    |      |                   |                 |
| <sup>solv</sup> <b>e</b>                                           | 0.00 | 0.00              | 0.00            |
| <sup>solv</sup> <b>e</b> <sup>+</sup>                              | 0.04 | -0.01             | 1.25            |
| <sup>solv</sup> <b>e</b> <sup>+</sup> - <b>2H</b>                  | 0.68 | 0.00              | 0.00            |

<sup>a</sup> Notably, the reported spin populations never differ by more than 0.12 spin units from those computed in models optimized without inclusion of a continuum solvent model (see Table S2)

The one-electron oxidation of <sup>solv</sup>**c** leads to <sup>solv</sup>**c**<sup>+</sup> (Cartesian coordinates of the model reported below); notably, overall spin populations and charges of the two portions composing the model indicate the *Fe(III)Fe(II)Ni(II)* state for the cationic complex. This implies that the Ni-Fe site does not change redox state, as oxidation mainly involves the metallocene fragment (see Table S7 for Mulliken charges of the two portions, and compare Table S7 with Table 3 in the paper main text to appreciate the consistency with DFT results obtained without COSMO-soaking). Then, we optimized the dihydrogen complex <sup>solv</sup>**c**<sup>+</sup>-**H**<sub>2</sub> (Cartesian coordinates of the model reported below): analogously to model **c**<sup>+</sup>-**H**<sub>2</sub> (see Figure 4 in the paper main text), the dihydrogen complex <sup>solv</sup>**c**<sup>+</sup>-**H**<sub>2</sub> is a minimum on the potential energy surface. Not differently from the case of H<sub>2</sub> binding to **c**<sup>+</sup> (see main text), the interaction between <sup>solv</sup>**c**<sup>+</sup> and dihydrogen is associated with the oxidation of the Ni center at the expenses of the Fe ion in the metallocene sandwich. In fact, as reported in Table S7 the spin population of the dinuclear site increases from zero to 0.98 going from <sup>solv</sup>**c**<sup>+</sup> to <sup>solv</sup>**c**<sup>+</sup>-**H**<sub>2</sub>, with the main contribution to such variation coming from the Ni ion (Mulliken spin population of Ni in <sup>solv</sup>**c**<sup>+</sup> and <sup>solv</sup>**c**<sup>+</sup>-**H**<sub>2</sub>: 0.00 and 1.07, respectively, see Table S8). Concomitantly, the overall spin population of the metallocene site drops from 0.98 to zero. As far as reaction energies are concerned, H<sub>2</sub> attachment to the Ni center of <sup>solv</sup>**c**<sup>+</sup> is disfavored by 12.4 kcal mol<sup>-1</sup> (an energy difference very close to the one computed for *in vacuo* optimized models: 10.4 kcal mol<sup>-1</sup>, see paper main text); the <sup>solv</sup>**c**<sup>+</sup> + H<sub>2</sub> → <sup>solv</sup>**c**<sup>+</sup>-**H**<sub>2</sub> binding reaction is characterized by a rather small barrier, lower than 13 kcal mol<sup>-1</sup> not differently from the results obtained for the **c**<sup>+</sup> + H<sub>2</sub> → **c**<sup>+</sup>-**H**<sub>2</sub> transformation (see main text).



Finally, we analyze the reactivity of model  $^{\text{sol}}\mathbf{c}'$  (Figure S6; Cartesian coordinates below). Mulliken population analyses show that  $^{\text{sol}}\mathbf{c}'$  features the  $Fe(II)Fe(II)Ni(II)$  state, see Table S7. The one-electron oxidation of  $^{\text{sol}}\mathbf{c}'$  leads to  $^{\text{sol}}[\mathbf{c}']^+$  (Cartesian coordinates below); notably, overall spin populations and charges of the two portions composing the model are consistent with the  $Fe(III)Fe(II)Ni(II)$  state for the cationic complex. This implies that the Ni-Fe site does not change redox state, in full analogy with what reported in the paper main text for the  $\mathbf{c} \rightarrow \mathbf{c}^+ + e^-$  oxidation, and with the data in Table S1 for the  $\mathbf{c}' \rightarrow [\mathbf{c}']^+ + e^-$  oxidation.

Then, we optimized the dihydrogen complex  $^{\text{sol}}[\mathbf{c}']^+-\mathbf{H}_2$  (Cartesian coordinates below; the model has the same connectivity as the one of  $[\mathbf{c}']^+-\mathbf{H}_2$  in Figure S2). Most notably,  $\text{H}_2$  binding to  $^{\text{sol}}[\mathbf{c}']^+$  is associated with the oxidation of the Ni center at the expenses of the Fe ion in the metallocene sandwich, an intramolecular redox process similar to the one observed as a result of  $\text{H}_2$  binding to  $\mathbf{c}^+$  and  $[\mathbf{c}']^+$  (see main text and see above). In fact – as reported in Table S7 – the spin population of the dinuclear site increases from 0.01 to 0.99 going from  $^{\text{sol}}[\mathbf{c}']^+$  to  $^{\text{sol}}[\mathbf{c}']^+-\mathbf{H}_2$ . The main contribution to such variation comes from the Ni ion (Mulliken spin population of Ni in  $^{\text{sol}}[\mathbf{c}']^+$  and  $^{\text{sol}}[\mathbf{c}']^+-\mathbf{H}_2$ : 0.00 and 1.09, respectively). Concomitantly, the overall spin population of the metallocene site drops from 0.99 to zero. As far as reaction energies are concerned,  $\text{H}_2$  attachment to the Ni center of  $^{\text{sol}}[\mathbf{c}']^+$  is disfavored by  $11.9 \text{ kcal mol}^{-1}$  (a value comparable with the one above reported for the  $\text{H}_2$ -binding reaction on model  $[\mathbf{c}']^+$ :  $9.4 \text{ kcal mol}^{-1}$ ). Finally, the  $^{\text{sol}}[\mathbf{c}']^+ + \text{H}_2 \rightarrow ^{\text{sol}}[\mathbf{c}']^+-\mathbf{H}_2$  binding reaction is characterized by a relatively small barrier ( $12.6 \text{ kcal mol}^{-1}$ ), again analogously to the case of dihydrogen binding to  $[\mathbf{c}']^+$  (see above).

### 3.4 – COSMO-soaked DFT optimizations on models including a basic group functional for $\text{H}_2$ splitting

Models analogous to the  $\mathbf{d}$  and  $\mathbf{e}$  ones presented in the paper main text were reoptimized here using the COSMO continuum solvent model. As for the first group of models, we optimized  $^{\text{sol}}\mathbf{d}$ ,  $^{\text{sol}}\mathbf{d}^+$ , and  $^{\text{sol}}\mathbf{d}^+-2\mathbf{H}$ : the sketches in Scheme 4 (see paper main text) for models without COSMO solvation well represent also the solvated models. Let us consider the case of model  $^{\text{sol}}\mathbf{d}$  first; computed Mulliken charges reported in Table S7 indicate that  $^{\text{sol}}\mathbf{d}$  features the  $Fe(II)Fe(II)Ni(II)$  state, while in the corresponding monocation  $^{\text{sol}}\mathbf{d}^+$  the iron center of the metallocene is ferric. As mentioned in a footnote of paper main text,  $\mathbf{d}^+-\mathbf{H}_2$  was among the models that were re-optimized using dispersion correction or the COSMO continuum solvent model, as reported in Methods. While the dispersion-corrected re-optimization of  $\mathbf{d}^+-\mathbf{H}_2$  leads to retention of  $\text{H}_2$  binding to Ni, the same does not hold true for the COSMO re-optimization. In fact, the dihydrogen complex is not a minimum in the latter case, as  $\text{H}_2$  detaches from the Ni ion. However, it is worth noticing that the isomer coming from  $\text{H}_2$  splitting on the complex is a minimum also when the COSMO model is applied ( $^{\text{sol}}\mathbf{d}^+-2\mathbf{H}$ , Cartesian coordinates reported below). The reaction leading to the formation of the latter –  $^{\text{sol}}\mathbf{d}^+ + \text{H}_2 \rightarrow ^{\text{sol}}\mathbf{d}^+-2\mathbf{H}$  – is associated with a  $\Delta E = +10.3 \text{ kcal mol}^{-1}$ , which is similar to the energy difference associated to the corresponding reaction taking place *in vacuo*:  $\Delta E = (9.8 + 2.9) \text{ kcal mol}^{-1} = 12.7 \text{ kcal mol}^{-1}$ , see main text.

Finally, as far as model of the  $\mathbf{e}$  class are concerned, we carried out COSMO-soaked DFT optimizations of models analogous to the ones reported in Scheme 5 in the paper main text.

The Cartesian coordinates of the obtained stationary points ( $^{\text{solv}}\mathbf{e}^+$  and  $^{\text{solv}}\mathbf{e}^+-2\mathbf{H}$ ) are reported below. In full analogy with what represented in Scheme 5, when optimization of an  $\text{H}_2$ -bound version of  $^{\text{solv}}\mathbf{e}^+$  was attempted, heterolytic splitting of  $\text{H}_2$  occurred along minimization leading to the terminal-hydride model  $^{\text{solv}}\mathbf{e}^+-2\mathbf{H}$ ; such picture is fully consistent with the one described in the paper main text for models optimized without continuum solvent model. Finally, the energy difference associated with  $\text{H}_2$  binding, computed using the COSMO solvent model, is similar ( $\Delta E = -1.8 \text{ kcal mol}^{-1}$ ) to the one computed *in vacuo* ( $\Delta E = +0.9 \text{ kcal mol}^{-1}$ , see paper main text).

#### **Section 4: Cartesian coordinates of models**

##### **Model b<sup>-</sup>:**

|    |            |           |            |
|----|------------|-----------|------------|
| C  | 7.8201136  | 1.7664327 | 0.6947944  |
| C  | 9.2210371  | 2.3294046 | 0.9218234  |
| C  | 9.3200140  | 3.8531573 | 0.9087881  |
| S  | 8.3539117  | 4.7064998 | 2.2490601  |
| Fe | 6.0541109  | 4.5322510 | 1.6336556  |
| C  | 5.6180733  | 4.6335398 | 3.5466046  |
| N  | 5.1934656  | 4.8091116 | 4.6304432  |
| Ni | 7.7119537  | 3.1316348 | 3.6720637  |
| S  | 7.1321340  | 1.6208207 | 5.2629025  |
| C  | 8.0216228  | 2.6447511 | 6.3364730  |
| N  | 8.0302760  | 2.5124102 | 7.6830555  |
| C  | 8.7747882  | 3.4511338 | 8.5291532  |
| C  | 10.1934993 | 2.9703537 | 8.8491067  |
| S  | 6.5742178  | 2.2307247 | 1.9943462  |
| S  | 8.8493608  | 3.8970866 | 5.4762308  |
| C  | 6.4787395  | 4.4297130 | -0.2463655 |
| N  | 6.7223633  | 4.3796760 | -1.3964411 |
| C  | 4.3670637  | 4.1643487 | 1.2821386  |
| O  | 3.2576131  | 3.9198331 | 1.0419184  |
| C  | 5.8828582  | 6.2825259 | 1.5143394  |
| O  | 5.7715086  | 7.4353311 | 1.4302095  |
| C  | 7.2092440  | 1.4895447 | 8.3424350  |
| C  | 5.8072265  | 1.9930019 | 8.6981583  |
| H  | 8.9713528  | 4.2647226 | -0.0480849 |
| H  | 10.3630334 | 4.1597705 | 1.0766607  |
| H  | 9.6121956  | 1.9495214 | 1.8805897  |
| H  | 9.8773500  | 1.9400035 | 0.1196927  |
| H  | 7.8525466  | 0.6670882 | 0.7176481  |
| H  | 7.4129571  | 2.0958604 | -0.2706200 |
| H  | 7.1405923  | 0.6304484 | 7.6599615  |
| H  | 7.7518576  | 1.1565956 | 9.2418242  |
| H  | 5.2283919  | 1.1907345 | 9.1806267  |
| H  | 5.8486761  | 2.8466315 | 9.3906781  |
| H  | 5.2776626  | 2.3099994 | 7.7900973  |
| H  | 8.8089087  | 4.4151786 | 8.0008329  |
| H  | 8.1937259  | 3.5987635 | 9.4531422  |
| H  | 10.7061180 | 3.6999546 | 9.4944974  |
| H  | 10.1837784 | 2.0018563 | 9.3711274  |
| H  | 10.7740291 | 2.8621909 | 7.9231373  |

### Model [c']<sup>+</sup>-H<sub>2</sub>:

|    |            |            |            |
|----|------------|------------|------------|
| C  | 0.1571474  | 7.5962739  | -0.1639583 |
| C  | 0.7678266  | 6.6760869  | 0.7486239  |
| C  | -0.2460999 | 5.8205250  | 1.2929004  |
| C  | -1.4883508 | 6.2027811  | 0.6849183  |
| C  | -1.2475998 | 7.3038429  | -0.2022351 |
| Fe | -0.1667495 | 5.6732060  | -0.8386048 |
| C  | 1.2774255  | 4.6290421  | -2.0019388 |
| C  | 0.2963899  | 3.7169961  | -1.4688391 |
| C  | -1.0203841 | 4.1145313  | -1.8984940 |
| C  | -0.8526212 | 5.2626299  | -2.7345725 |
| C  | 0.5464264  | 5.5802668  | -2.7860985 |
| N  | 0.5690225  | 2.6240510  | -0.6925198 |
| C  | 0.6105683  | 1.6307007  | -0.0535561 |
| Fe | 0.5696911  | 0.1048941  | 0.9685083  |
| C  | 1.2510582  | 0.7999647  | 2.4753773  |
| O  | 1.6635580  | 1.2298699  | 3.4605282  |
| C  | 2.7604924  | 4.5310600  | -1.8388664 |
| C  | -0.0567861 | 4.7495138  | 2.3180275  |
| C  | -1.0969140 | 0.8811484  | 1.5575376  |
| N  | -2.0643440 | 1.4583312  | 1.8865028  |
| C  | 2.2168928  | -0.3735149 | 0.3871601  |
| O  | 3.3073266  | -0.5252661 | 0.0405395  |
| Ni | 0.2119677  | -3.1314151 | 0.0901569  |
| S  | -0.5187119 | -1.1508889 | -0.7362140 |
| C  | -2.2902351 | -1.3250978 | -0.1745960 |
| C  | -2.5033633 | -2.2852194 | 0.9974434  |
| C  | -1.7009713 | -2.0283294 | 2.2733160  |
| S  | 0.1473901  | -1.9663346 | 2.0300018  |
| S  | -0.2277470 | -4.4419287 | -1.7162173 |
| C  | 0.0497127  | -5.7886699 | -0.6432505 |
| S  | 0.4168403  | -5.2228087 | 0.9643989  |
| N  | -0.0101163 | -7.0680039 | -1.0009732 |
| C  | -0.3358656 | -7.4653453 | -2.3879876 |
| C  | -1.8261505 | -7.7408241 | -2.5905803 |
| C  | 0.2500581  | -8.1517318 | -0.0277989 |
| C  | 1.7085092  | -8.6119485 | -0.0322044 |
| H  | -2.6490545 | -0.3139163 | 0.0483708  |
| H  | -2.8134584 | -1.7083520 | -1.0614901 |
| H  | -2.3084742 | -3.3157699 | 0.6551657  |
| H  | -3.5737471 | -2.2456007 | 1.2656260  |
| H  | -1.8507481 | -2.8601525 | 2.9752177  |
| H  | -1.9850084 | -1.0902529 | 2.7641374  |
| H  | -0.0415793 | -7.7858104 | 0.9662856  |
| H  | -0.4276599 | -8.9781601 | -0.2852145 |
| H  | 1.8361419  | -9.4293533 | 0.6907279  |
| H  | 2.0142151  | -8.9866636 | -1.0188895 |
| H  | 2.3798478  | -7.7924995 | 0.2559247  |
| H  | 0.0080859  | -6.6622406 | -3.0544413 |
| H  | 0.2657407  | -8.3580992 | -2.6108548 |
| H  | -2.0023662 | -8.0545290 | -3.6287311 |
| H  | -2.1851494 | -8.5442392 | -1.9324125 |
| H  | -2.4219517 | -6.8387013 | -2.4000865 |
| H  | 3.2363609  | 5.5151152  | -1.9326643 |
| H  | 3.0368509  | 4.1012967  | -0.8671285 |
| H  | 3.1834477  | 3.8809974  | -2.6217744 |
| H  | 0.9631833  | 4.3434387  | 2.2951915  |
| H  | -0.2156044 | 5.1727903  | 3.3232677  |
| H  | -0.7742975 | 3.9268231  | 2.1930257  |
| H  | -1.9456696 | 3.6070552  | -1.6424362 |
| H  | -1.6501223 | 5.8026067  | -3.2367129 |
| H  | 0.9918833  | 6.4089180  | -3.3304625 |
| H  | 1.8277719  | 6.6240973  | 0.9867377  |
| H  | 0.6661836  | 8.3721233  | -0.7292508 |
| H  | -1.9936812 | 7.8194794  | -0.8006226 |
| H  | -2.4480419 | 5.7256199  | 0.8682367  |
| H  | 2.2161304  | -3.1887347 | 0.0266177  |
| H  | 2.0531622  | -2.9708314 | -0.6945681 |

### Model [c']<sub>TS</sub><sup>+</sup>-H<sub>2</sub>:

|    |            |             |            |
|----|------------|-------------|------------|
| C  | 9.4841911  | 1.5763987   | -4.8068053 |
| C  | 9.5074900  | 0.3718248   | -4.0357200 |
| C  | 8.2966968  | 0.3799022   | -3.2517735 |
| C  | 7.5479067  | 1.5828290   | -3.5248328 |
| C  | 8.2900495  | 2.3117926   | -4.5071457 |
| Fe | 9.4068604  | 2.0965981   | -2.7845226 |
| C  | 10.2358006 | 3.9403731   | -2.3484920 |
| C  | 11.2234393 | 2.9060736   | -2.2351079 |
| C  | 10.7847207 | 1.9953383   | -1.2183419 |
| C  | 9.5370538  | 2.4650334   | -0.6851900 |
| C  | 9.1991889  | 3.6597713   | -1.4011837 |
| C  | 8.7497220  | 1.8429042   | 0.4233702  |
| C  | 10.5237862 | -0.7223575  | -4.0836388 |
| N  | 7.8957050  | -0.6206433  | -2.4098355 |
| C  | 7.3474229  | -1.4149607  | -1.7273732 |
| Fe | 6.4093463  | -2.6014336  | -0.6899167 |
| S  | 4.8887550  | -4.1326414  | 0.2882183  |
| C  | 3.1930349  | -3.4870723  | -0.1480774 |
| C  | 2.7892266  | -3.6984221  | -1.6084278 |
| C  | 3.7155583  | -3.1302207  | -2.6858218 |
| S  | 5.4868124  | -3.7102602  | -2.5847957 |
| Ni | 5.0785692  | -5.6012571  | -1.4165368 |
| S  | 4.2344851  | -7.4376585  | -0.3866019 |
| C  | 4.2475376  | -8.1690081  | -1.9697603 |
| N  | 3.8266559  | -9.4005364  | -2.2413490 |
| C  | 3.2920619  | -10.2862989 | -1.1833146 |
| C  | 4.3501121  | -11.2259789 | -0.6052571 |
| C  | 6.8246426  | -1.9089429  | 0.9132333  |
| O  | 7.0657580  | -1.4668756  | 1.9488343  |
| C  | 5.0982553  | -1.1872869  | -0.7782648 |
| N  | 4.3879622  | -0.2558851  | -0.8474649 |
| C  | 7.8342340  | -3.7171944  | -0.6339639 |
| O  | 8.8427497  | -4.2769438  | -0.5825574 |
| S  | 4.8813469  | -7.0525839  | -3.1505786 |
| C  | 3.8613613  | -9.9360437  | -3.6198033 |
| C  | 2.5557644  | -9.6994914  | -4.3805696 |
| H  | 3.7438764  | -2.0348692  | -2.6711262 |
| H  | 3.3798533  | -3.4708232  | -3.6747277 |
| H  | 2.6496104  | -4.7783334  | -1.7873373 |
| H  | 1.7980385  | -3.2316274  | -1.7478342 |
| H  | 2.5150682  | -4.0513245  | 0.5068259  |
| H  | 3.1735431  | -2.4302554  | 0.1411490  |
| H  | 2.8649436  | -9.6477112  | -0.3981120 |
| H  | 2.4632770  | -10.8515321 | -1.6334099 |
| H  | 3.8887439  | -11.8720722 | 0.1544603  |
| H  | 4.7844429  | -11.8757453 | -1.3776070 |
| H  | 5.1600466  | -10.6601961 | -0.1268048 |
| H  | 4.7075514  | -9.4653433  | -4.1393392 |
| H  | 4.0823932  | -11.0093637 | -3.5363346 |
| H  | 2.6331598  | -10.1385147 | -5.3846689 |
| H  | 1.6995333  | -10.1672184 | -3.8751021 |
| H  | 2.3549845  | -8.6257996  | -4.4910910 |
| H  | 11.5101856 | -0.3377863  | -4.3715265 |
| H  | 10.6156235 | -1.2369453  | -3.1182955 |
| H  | 10.2290772 | -1.4740718  | -4.8336829 |
| H  | 8.9111168  | 0.7585827   | 0.4766852  |
| H  | 9.0701467  | 2.2676190   | 1.3883906  |
| H  | 7.6740547  | 2.0350507   | 0.3193901  |
| H  | 6.5889033  | 1.8407914   | -3.0842094 |
| H  | 8.0012967  | 3.2650051   | -4.9410735 |
| H  | 10.2634530 | 1.8858258   | -5.4988142 |
| H  | 11.3057772 | 1.0954876   | -0.8992096 |
| H  | 12.1366316 | 2.8250371   | -2.8182774 |
| H  | 10.2627924 | 4.7797289   | -3.0381371 |
| H  | 8.2919221  | 4.2417168   | -1.2577597 |
| H  | 7.0705893  | -6.4748375  | -0.7187692 |
| H  | 7.1506947  | -6.4173152  | -1.4731177 |

### Model [c']<sup>+</sup>:

|    |            |             |            |
|----|------------|-------------|------------|
| O  | 7.2444672  | -4.9059736  | -1.3843276 |
| C  | 4.6487684  | -0.8866344  | -0.4552163 |
| Fe | 5.4455374  | -2.6046428  | -0.7979999 |
| C  | 6.5914833  | -1.6135943  | -1.8331408 |
| N  | 7.2931304  | -0.9140874  | -2.4758877 |
| C  | 6.3618522  | -4.1752382  | -1.2012727 |
| Ni | 4.2032603  | -4.8334287  | -1.4621904 |
| S  | 4.3876271  | -6.2199186  | -3.2161354 |
| C  | 4.4771885  | -7.5007102  | -2.0306560 |
| N  | 4.5964811  | -8.7928638  | -2.3121446 |
| C  | 4.6834201  | -9.8072924  | -1.2375397 |
| C  | 6.1268657  | -10.1482600 | -0.8652906 |
| N  | 4.2042132  | 0.1847896   | -0.2815054 |
| S  | 4.3602963  | -6.8323581  | -0.4270580 |
| S  | 3.7447063  | -3.7068889  | 0.4137103  |
| C  | 2.1709876  | -2.7473923  | 0.1955754  |
| C  | 1.5539197  | -2.8108462  | -1.1969902 |
| C  | 2.3825995  | -2.1479094  | -2.2916285 |
| S  | 4.0149728  | -2.9527689  | -2.6593316 |
| C  | 4.6450544  | -9.2764029  | -3.7098895 |
| C  | 3.2722877  | -9.6983158  | -4.2357870 |
| C  | 6.3584771  | -2.4154898  | 0.7357822  |
| O  | 6.9277063  | -2.2723734  | 1.7257805  |
| H  | 2.6021409  | -1.0989153  | -2.0492244 |
| H  | 1.8529554  | -2.1906266  | -3.2530853 |
| H  | 1.3340453  | -3.8558190  | -1.4672809 |
| H  | 0.5850146  | -2.2843330  | -1.1524731 |
| H  | 1.4960071  | -3.1970159  | 0.9365903  |
| H  | 2.3899340  | -1.7130080  | 0.4937767  |
| H  | 4.1340897  | -9.4209610  | -0.3678055 |
| H  | 4.1454136  | -10.6960556 | -1.5964638 |
| H  | 6.1292752  | -10.9184846 | -0.0816254 |
| H  | 6.6863875  | -10.5431082 | -1.7245941 |
| H  | 6.6526642  | -9.2652486  | -0.4792343 |
| H  | 5.0709864  | -8.4725885  | -4.3259093 |
| H  | 5.3533791  | -10.1167774 | -3.7303397 |
| H  | 3.3739928  | -10.0712155 | -5.2642560 |
| H  | 2.8332207  | -10.5029456 | -3.6298223 |
| H  | 2.5771453  | -8.8485684  | -4.2462680 |
| C  | 7.8955813  | 0.0508494   | -3.2373179 |
| C  | 7.4929293  | 1.4351930   | -3.2884549 |
| C  | 8.3316562  | 2.0701457   | -4.2569057 |
| C  | 9.2503418  | 1.0945155   | -4.7668199 |
| C  | 8.9988335  | -0.1682995  | -4.1409145 |
| Fe | 9.4760446  | 1.3242056   | -2.7064664 |
| C  | 9.6659366  | -1.4746867  | -4.4268658 |
| H  | 10.6966133 | -1.3271930  | -4.7735259 |
| H  | 9.6854476  | -2.1250748  | -3.5428923 |
| H  | 9.1209585  | -2.0086894  | -5.2217311 |
| C  | 10.7598357 | 0.6396519   | -1.2289625 |
| C  | 9.7980500  | 1.5191267   | -0.6177053 |
| C  | 9.9259140  | 2.7910293   | -1.2651272 |
| C  | 10.9617733 | 2.7087664   | -2.2478053 |
| C  | 11.4839999 | 1.3744070   | -2.2258335 |
| C  | 8.8751695  | 1.1850806   | 0.5115880  |
| H  | 8.6107855  | 0.1204402   | 0.5184168  |
| H  | 9.3698113  | 1.4046744   | 1.4714692  |
| H  | 7.9512044  | 1.7754844   | 0.4738516  |
| H  | 6.6806671  | 1.8755064   | -2.7170003 |
| H  | 8.2865545  | 3.1172644   | -4.5447129 |
| H  | 10.0322135 | 1.2786068   | -5.4999377 |
| H  | 10.9140193 | -0.4041443  | -0.9661134 |
| H  | 12.2785128 | 0.9878898   | -2.8587178 |
| H  | 11.2776848 | 3.5098976   | -2.9110329 |
| H  | 9.3106939  | 3.6641788   | -1.0608506 |

### Model c':

|    |            |             |            |
|----|------------|-------------|------------|
| O  | 7.0534812  | -4.5484756  | -1.0785257 |
| C  | 4.1782769  | -0.7007040  | -0.1742127 |
| Fe | 5.1400683  | -2.3298552  | -0.5457078 |
| C  | 6.2625691  | -1.3385434  | -1.5986712 |
| N  | 6.9725257  | -0.6941234  | -2.2880498 |
| C  | 6.1036303  | -3.8822994  | -0.9449604 |
| Ni | 4.0963674  | -4.6728539  | -1.3509107 |
| S  | 4.5735910  | -5.9130309  | -3.1759622 |
| C  | 4.6738353  | -7.2523041  | -2.0752294 |
| N  | 4.9518180  | -8.5143360  | -2.4314779 |
| C  | 5.0290127  | -9.5907790  | -1.4281242 |
| C  | 6.4515289  | -9.8213434  | -0.9134567 |
| N  | 3.5979041  | 0.2968903   | 0.0418256  |
| S  | 4.3426501  | -6.7294369  | -0.4531850 |
| S  | 3.5022920  | -3.6625349  | 0.5519335  |
| C  | 1.8644488  | -2.8140419  | 0.3500761  |
| C  | 1.2753709  | -2.8641539  | -1.0549618 |
| C  | 2.0732380  | -2.0913010  | -2.0987191 |
| S  | 3.7637497  | -2.7644653  | -2.4630509 |
| C  | 5.1974848  | -8.8714637  | -3.8392936 |
| C  | 3.9332234  | -9.3357537  | -4.5660763 |
| C  | 6.0308479  | -2.0828963  | 0.9633461  |
| O  | 6.6038276  | -1.9046971  | 1.9528753  |
| H  | 2.2105755  | -1.0441610  | -1.7956281 |
| H  | 1.5614338  | -2.1221900  | -3.0707564 |
| H  | 1.1528476  | -3.9120943  | -1.3743958 |
| H  | 0.2648569  | -2.4195453  | -1.0097959 |
| H  | 1.2076520  | -3.3376840  | 1.0587521  |
| H  | 2.0027217  | -1.7768402  | 0.6850814  |
| H  | 4.3570979  | -9.3238474  | -0.6003045 |
| H  | 4.6263638  | -10.5010894 | -1.8967296 |
| H  | 6.4543366  | -10.6419125 | -0.1816381 |
| H  | 7.1380690  | -10.0940984 | -1.7276377 |
| H  | 6.8355123  | -8.9187088  | -0.4207726 |
| H  | 5.6260047  | -7.9897364  | -4.3362831 |
| H  | 5.9666510  | -9.6584219  | -3.8450943 |
| H  | 4.1770665  | -9.6048191  | -5.6037610 |
| H  | 3.4902420  | -10.2187130 | -4.0838618 |
| H  | 3.1821814  | -8.5348242  | -4.5867364 |
| C  | 7.7153779  | 0.0799254   | -3.1391608 |
| C  | 7.5938793  | 1.5090542   | -3.2933314 |
| C  | 8.4953781  | 1.8926395   | -4.3355233 |
| C  | 9.1722849  | 0.7180816   | -4.8049322 |
| C  | 8.7109061  | -0.4224874  | -4.0662713 |
| Fe | 9.5177152  | 0.9916675   | -2.7925031 |
| C  | 9.0770457  | -1.8577288  | -4.2769028 |
| H  | 10.0984942 | -1.9487818  | -4.6703405 |
| H  | 9.0150287  | -2.4323686  | -3.3435381 |
| H  | 8.3948820  | -2.3309873  | -5.0025826 |
| C  | 10.5823250 | 0.1104789   | -1.2616596 |
| C  | 9.8787836  | 1.2636475   | -0.7641117 |
| C  | 10.3418445 | 2.3946789   | -1.5217556 |
| C  | 11.3175932 | 1.9457821   | -2.4709415 |
| C  | 11.4674413 | 0.5285610   | -2.3087296 |
| C  | 8.8996730  | 1.2901726   | 0.3689608  |
| H  | 8.3309697  | 0.3535989   | 0.4352256  |
| H  | 9.4244752  | 1.4240774   | 1.3292201  |
| H  | 8.1836309  | 2.1163933   | 0.2643326  |
| H  | 6.9250865  | 2.1476647   | -2.7242194 |
| H  | 8.6580088  | 2.9071336   | -4.6891785 |
| H  | 9.9374743  | 0.6912463   | -5.5772098 |
| H  | 10.4448120 | -0.9101907  | -0.9116610 |
| H  | 12.1184038 | -0.1163802  | -2.8932952 |
| H  | 11.8319794 | 2.5641676   | -3.2021226 |
| H  | 9.9844537  | 3.4156409   | -1.4092494 |

### Model c:

|    |           |            |            |
|----|-----------|------------|------------|
| C  | 3.5598478 | 4.7315471  | 3.7515526  |
| C  | 3.8114984 | 5.0960986  | 5.1129808  |
| C  | 5.0860429 | 5.7537715  | 5.1768097  |
| C  | 5.6542620 | 5.8162924  | 3.8594114  |
| C  | 4.7099461 | 5.1489310  | 2.9818079  |
| Fe | 3.8157601 | 6.7589531  | 3.9137789  |
| C  | 2.0962966 | 7.6514244  | 3.2030738  |
| C  | 3.2358425 | 8.1109015  | 2.4654316  |
| C  | 4.1422403 | 8.7241120  | 3.3905178  |
| C  | 3.5549526 | 8.6456139  | 4.6972771  |
| C  | 2.2833214 | 7.9811109  | 4.5914775  |
| C  | 1.2994472 | 7.7587623  | 5.7007731  |
| C  | 7.0020888 | 6.3344275  | 3.4679482  |
| N  | 4.8869100 | 4.9497791  | 1.6477781  |
| C  | 5.1249449 | 4.6052292  | 0.5289367  |
| Fe | 5.1507675 | 4.8535639  | -1.3871253 |
| C  | 5.2126853 | 5.0519524  | -3.2997796 |
| N  | 5.2561349 | 5.1685448  | -4.4671868 |
| C  | 3.4526901 | 5.3635595  | -1.4072759 |
| O  | 2.3459317 | 5.6988109  | -1.4269625 |
| C  | 5.8318498 | 6.4804555  | -1.2188002 |
| O  | 6.2768965 | 7.5430212  | -1.1128174 |
| S  | 7.3357695 | 3.9003994  | -1.3446540 |
| Ni | 6.0514673 | 2.6836818  | 0.0241364  |
| S  | 7.6014948 | 2.4642567  | 1.6557524  |
| C  | 6.4721690 | 1.3737577  | 2.3992597  |
| N  | 6.7135799 | 0.6728244  | 3.5164662  |
| C  | 5.7060434 | -0.2442030 | 4.0758222  |
| C  | 4.8410904 | 0.4097673  | 5.1545707  |
| S  | 4.4975578 | 2.5654714  | -1.5763093 |
| C  | 5.2558969 | 1.9068487  | -3.1369259 |
| C  | 6.7676446 | 1.7104971  | -3.0936242 |
| C  | 7.5736599 | 2.9968080  | -2.9481919 |
| S  | 5.0108168 | 1.2824834  | 1.4654304  |
| C  | 8.0064238 | 0.7796027  | 4.2151445  |
| C  | 9.0240963 | -0.2622801 | 3.7455306  |
| H  | 5.5452869 | 6.1657259  | 6.0722122  |
| H  | 3.1389084 | 4.9242817  | 5.9489904  |
| H  | 5.1089423 | 9.1562222  | 3.1465791  |
| H  | 3.9996425 | 9.0106604  | 5.6201869  |
| H  | 7.3349768 | 3.7089872  | -3.7494484 |
| H  | 8.6500069 | 2.7755766  | -2.9699222 |
| H  | 7.0311105 | 1.0101430  | -2.2844318 |
| H  | 7.0688187 | 1.2343940  | -4.0442976 |
| H  | 4.7514430 | 0.9423635  | -3.2896092 |
| H  | 4.9675671 | 2.5961728  | -3.9422243 |
| H  | 5.0825248 | -0.5997115 | 3.2434065  |
| H  | 6.2456669 | -1.1150957 | 4.4775152  |
| H  | 4.1167203 | -0.3195090 | 5.5449467  |
| H  | 5.4480071 | 0.7673707  | 5.9987173  |
| H  | 4.2852713 | 1.2615344  | 4.7414134  |
| H  | 8.3924603 | 1.7954097  | 4.0491889  |
| H  | 7.8028755 | 0.6768712  | 5.2911582  |
| H  | 9.9618063 | -0.1482914 | 4.3080810  |
| H  | 8.6578179 | -1.2865049 | 3.9044883  |
| H  | 9.2453594 | -0.1310775 | 2.6782022  |
| H  | 6.9911449 | 6.7674160  | 2.4587558  |
| H  | 7.3445948 | 7.1068267  | 4.1696886  |
| H  | 7.7454728 | 5.5202444  | 3.4667850  |
| H  | 1.2384444 | 7.1280204  | 2.7874651  |
| H  | 3.3965192 | 7.9889896  | 1.3976963  |
| H  | 1.8039583 | 7.6458208  | 6.6705223  |
| H  | 0.6112570 | 8.6164595  | 5.7846186  |
| H  | 0.6889167 | 6.8626261  | 5.5241981  |
| H  | 2.6914956 | 4.2166489  | 3.3520193  |

### Model c<sup>+</sup>:

|   |           |           |           |
|---|-----------|-----------|-----------|
| C | 3.5431982 | 4.9723615 | 3.9184015 |
| C | 3.8225933 | 5.3986213 | 5.2551949 |

|    |            |            |            |
|----|------------|------------|------------|
| C  | 5.1167352  | 6.0152008  | 5.2697664  |
| C  | 5.6790624  | 5.9769982  | 3.9541963  |
| C  | 4.7041407  | 5.3054850  | 3.1228275  |
| Fe | 3.8275978  | 7.0103711  | 3.9676314  |
| C  | 2.2935620  | 7.9471989  | 2.9448375  |
| C  | 3.5613454  | 8.4953329  | 2.5518193  |
| C  | 4.1752945  | 9.0543683  | 3.7167309  |
| C  | 3.2872569  | 8.8543616  | 4.8192702  |
| C  | 2.1106334  | 8.1800002  | 4.3524720  |
| C  | 0.8976493  | 7.8402297  | 5.1603999  |
| C  | 7.0324962  | 6.4441584  | 3.5250848  |
| N  | 4.8589015  | 5.0349491  | 1.7986361  |
| C  | 5.0629599  | 4.6588656  | 0.6864120  |
| Fe | 5.0910327  | 4.7554253  | -1.2220535 |
| C  | 5.0888351  | 4.9744200  | -3.1301771 |
| N  | 5.0956050  | 5.0976130  | -4.2962846 |
| C  | 3.3620356  | 5.2364598  | -1.2470561 |
| O  | 2.2535862  | 5.5431145  | -1.2719297 |
| C  | 5.7769445  | 6.4112340  | -1.1414103 |
| O  | 6.2182535  | 7.4731274  | -1.0992323 |
| S  | 7.2811517  | 3.8787229  | -1.2730242 |
| Ni | 6.0014030  | 2.6933892  | 0.1252124  |
| S  | 7.6092416  | 2.4330252  | 1.6834490  |
| C  | 6.5330868  | 1.2659952  | 2.4070352  |
| N  | 6.8416903  | 0.4782253  | 3.4318409  |
| C  | 5.8753213  | -0.5071323 | 3.9636482  |
| C  | 5.0618919  | 0.0361773  | 5.1385714  |
| S  | 4.4233612  | 2.5024267  | -1.4400814 |
| C  | 5.1743198  | 1.8302070  | -2.9968989 |
| C  | 6.6881178  | 1.6531485  | -2.9769615 |
| C  | 7.4867789  | 2.9468520  | -2.8638575 |
| S  | 5.0212399  | 1.2351363  | 1.5403965  |
| C  | 8.1803076  | 0.5263886  | 4.0615866  |
| C  | 9.1473925  | -0.4995718 | 3.4696295  |
| H  | 5.5968738  | 6.4651840  | 6.1351961  |
| H  | 3.1587159  | 5.2868456  | 6.1077435  |
| H  | 5.1528019  | 9.5275344  | 3.7615063  |
| H  | 3.4800914  | 9.1406940  | 5.8503975  |
| H  | 7.2317597  | 3.6519730  | -3.6668426 |
| H  | 8.5647249  | 2.7375207  | -2.8997688 |
| H  | 6.9775984  | 0.9577564  | -2.1735579 |
| H  | 6.9737824  | 1.1746464  | -3.9298449 |
| H  | 4.6744396  | 0.8597770  | -3.1223651 |
| H  | 4.8557609  | 2.5034732  | -3.8050421 |
| H  | 5.2169598  | -0.8082512 | 3.1369352  |
| H  | 6.4556603  | -1.3922282 | 4.2603758  |
| H  | 4.3819129  | -0.7451922 | 5.5046731  |
| H  | 5.7075784  | 0.3378868  | 5.9749460  |
| H  | 4.4568029  | 0.8995318  | 4.8316948  |
| H  | 8.5710110  | 1.5461145  | 3.9391186  |
| H  | 8.0312019  | 0.3583473  | 5.1374976  |
| H  | 10.1148968 | -0.4295509 | 3.9854092  |
| H  | 8.7772635  | -1.5267808 | 3.5914474  |
| H  | 9.3140711  | -0.3103992 | 2.4012637  |
| H  | 7.0195835  | 6.8610339  | 2.5096139  |
| H  | 7.4213373  | 7.2090961  | 4.2089120  |
| H  | 7.7411068  | 5.6000973  | 3.5249241  |
| H  | 1.5809959  | 7.4504379  | 2.2911950  |
| H  | 3.9834048  | 8.4834262  | 1.5507708  |
| H  | 1.1440359  | 7.6822712  | 6.2185058  |
| H  | 0.1753641  | 8.6710904  | 5.1119464  |
| H  | 0.3915821  | 6.9438066  | 4.7787620  |
| H  | 2.6587431  | 4.4563245  | 3.5574209  |

### Model $c_{TS}^+ - H_2$ :

|    |           |           |           |
|----|-----------|-----------|-----------|
| C  | 1.7936050 | 6.4268903 | 3.0464263 |
| C  | 1.9773695 | 6.0931531 | 4.4272423 |
| C  | 3.3835280 | 6.0016254 | 4.6722617 |
| C  | 4.0864246 | 6.2672017 | 3.4511412 |
| C  | 3.0934498 | 6.5443664 | 2.4486639 |
| Fe | 2.8669913 | 7.9217269 | 3.9810634 |
| C  | 4.1055521 | 9.5076087 | 4.4996571 |
| C  | 3.1420821 | 9.3076399 | 5.5386642 |



|    |            |            |            |
|----|------------|------------|------------|
| C  | 1.8244350  | 9.4597135  | 5.0049011  |
| C  | 1.9944913  | 9.7658062  | 3.6001891  |
| C  | 3.4059654  | 9.7799536  | 3.2825652  |
| H  | 3.3665687  | 9.0501421  | 6.5710286  |
| C  | 0.5292611  | 9.4063607  | 5.7498165  |
| N  | 0.9836206  | 10.0605835 | 2.7271770  |
| C  | 0.1368232  | 10.3834513 | 1.9631366  |
| Fe | -1.1511070 | 10.6012033 | 0.6412812  |
| C  | 0.0445576  | 10.1939018 | -0.6339183 |
| O  | 0.8112364  | 9.9504290  | -1.4572761 |
| H  | 5.1846149  | 9.4442461  | 4.6098748  |
| H  | 1.1901328  | 5.9492475  | 5.1626362  |
| H  | 3.8498571  | 5.7918600  | 5.6321548  |
| C  | 5.5677928  | 6.2123690  | 3.2461482  |
| C  | -1.7570183 | 8.9389857  | 0.9254677  |
| O  | -2.1593396 | 7.8760769  | 1.1131947  |
| S  | -2.6928021 | 11.5582290 | 2.1709299  |
| C  | -3.9774505 | 12.4055602 | 1.1153001  |
| C  | -3.5017280 | 13.6962737 | 0.4425161  |
| C  | -2.2466824 | 13.6265989 | -0.4316103 |
| S  | -0.7402484 | 12.9329726 | 0.4241559  |
| Ni | -1.4194834 | 13.3930656 | 2.5249490  |
| S  | -0.5359380 | 15.4797098 | 2.7148614  |
| C  | -1.5451612 | 15.6327729 | 4.1298476  |
| N  | -1.6606365 | 16.7378398 | 4.8605095  |
| C  | -2.5700385 | 16.7997655 | 6.0262806  |
| C  | -3.9549987 | 17.3399804 | 5.6671345  |
| C  | -2.4309584 | 10.6292281 | -0.7982155 |
| N  | -3.1921618 | 10.5963133 | -1.6897096 |
| S  | -2.4046555 | 14.1449826 | 4.4348740  |
| C  | -0.9053228 | 17.9659869 | 4.5272238  |
| C  | 0.4090903  | 18.0813683 | 5.2997229  |
| H  | -4.3238342 | 11.6612462 | 0.3897383  |
| H  | -4.7906729 | 12.6362231 | 1.8167307  |
| H  | -3.3552517 | 14.4697726 | 1.2165033  |
| H  | -4.3269011 | 14.0551415 | -0.1973837 |
| H  | -1.9451918 | 14.6422717 | -0.7218640 |
| H  | -2.3996971 | 13.0221987 | -1.3327009 |
| H  | -0.7234789 | 17.9626132 | 3.4437632  |
| H  | -1.5686455 | 18.8145570 | 4.7460906  |
| H  | 0.9094886  | 19.0221245 | 5.0310563  |
| H  | 0.2437267  | 18.0886604 | 6.3858705  |
| H  | 1.0843603  | 17.2520510 | 5.0521075  |
| H  | -2.6428023 | 15.7877770 | 6.4478054  |
| H  | -2.0792080 | 17.4352588 | 6.7769161  |
| H  | -4.5754299 | 17.3864313 | 6.5726576  |
| H  | -3.9007273 | 18.3532775 | 5.2457999  |
| H  | -4.4559314 | 16.6848276 | 4.9424416  |
| H  | 0.5104139  | 12.8475882 | 3.5340662  |
| H  | 0.0046508  | 12.5130225 | 3.9943520  |
| H  | -0.2906413 | 9.0369749  | 5.1201720  |
| H  | 0.6068965  | 8.7626304  | 6.6349806  |
| H  | 0.2518530  | 10.4144896 | 6.0984277  |
| H  | 3.2996253  | 6.7915379  | 1.4100150  |
| H  | 0.8410208  | 6.5678981  | 2.5425138  |
| H  | 6.1158545  | 6.4493511  | 4.1674827  |
| H  | 5.8608119  | 5.1944272  | 2.9426090  |
| H  | 5.8958037  | 6.8974726  | 2.4536116  |
| H  | 3.8336126  | 9.9995781  | 2.3088154  |

### Model $c^+-H_2$ :

|    |           |           |           |
|----|-----------|-----------|-----------|
| C  | 3.2599534 | 9.5567594 | 3.3870826 |
| C  | 4.0456210 | 9.2577944 | 4.5426253 |
| C  | 3.1737665 | 9.2156146 | 5.6812823 |
| C  | 1.8302110 | 9.4980587 | 5.2608190 |
| C  | 1.9019989 | 9.7266352 | 3.8348764 |
| Fe | 2.6056500 | 7.7995280 | 4.2868218 |
| C  | 3.2239142 | 6.1350361 | 3.1606053 |
| C  | 1.8193266 | 6.3527168 | 3.0129084 |
| C  | 1.2210316 | 6.2690327 | 4.3134028 |
| C  | 2.2683994 | 6.0004759 | 5.2562312 |
| C  | 3.5152020 | 5.9063722 | 4.5460986 |
| C  | 4.8508324 | 5.5753460 | 5.1349488 |

|    |            |            |            |
|----|------------|------------|------------|
| C  | 0.6167099  | 9.6329868  | 6.1243143  |
| N  | 0.8424638  | 10.0594189 | 3.0380197  |
| C  | -0.0659352 | 10.3882726 | 2.3507226  |
| Fe | -1.5313881 | 10.5588498 | 1.2160299  |
| C  | -3.0486071 | 10.4833232 | 0.0325630  |
| N  | -3.9687581 | 10.3822877 | -0.6875273 |
| C  | -0.7016578 | 9.5787607  | -0.0382611 |
| O  | -0.1691636 | 8.9661940  | -0.8543132 |
| C  | -2.3535298 | 9.2107372  | 2.0666604  |
| O  | -2.8932103 | 8.3556854  | 2.6173431  |
| S  | -2.5532504 | 12.2090363 | 2.5813724  |
| Ni | -0.9258410 | 13.7413847 | 2.2083243  |
| S  | -1.4841270 | 15.2311981 | 3.8441421  |
| C  | -0.4666132 | 16.3556016 | 2.9808570  |
| N  | -0.2817763 | 17.6265918 | 3.3248520  |
| C  | 0.5998604  | 18.5166541 | 2.5369638  |
| C  | 2.0321168  | 18.5522871 | 3.0716025  |
| S  | -0.7744261 | 12.5943871 | 0.2613674  |
| C  | -2.2734347 | 13.3494435 | -0.5528238 |
| C  | -3.3077757 | 13.9282153 | 0.4153814  |
| C  | -3.8544077 | 13.0066280 | 1.5084960  |
| S  | 0.2557192  | 15.5901627 | 1.5907961  |
| C  | -0.9596919 | 18.2128086 | 4.5024033  |
| C  | -2.2755409 | 18.9033736 | 4.1427934  |
| H  | 3.4712779  | 9.0031183  | 6.7049485  |
| H  | 5.1175257  | 9.0812045  | 4.5502900  |
| H  | 0.1653534  | 6.3843680  | 4.5433328  |
| H  | 2.1472823  | 5.8850518  | 6.3307217  |
| H  | -4.4611168 | 12.1905414 | 1.0997044  |
| H  | -4.4604665 | 13.5919820 | 2.2132907  |
| H  | -2.8875072 | 14.8324220 | 0.8873229  |
| H  | -4.1680450 | 14.2665866 | -0.1880796 |
| H  | -1.8610763 | 14.1558823 | -1.1745743 |
| H  | -2.6970429 | 12.5736757 | -1.2005452 |
| H  | 0.5796779  | 18.1701685 | 1.4945922  |
| H  | 0.1427204  | 19.5160067 | 2.5602292  |
| H  | 2.6309955  | 19.2464095 | 2.4661500  |
| H  | 2.0687082  | 18.8985453 | 4.1136898  |
| H  | 2.4976187  | 17.5594904 | 3.0143195  |
| H  | -1.1272893 | 17.4046680 | 5.2275816  |
| H  | -0.2511398 | 18.9206897 | 4.9557042  |
| H  | -2.7209200 | 19.3376001 | 5.0483736  |
| H  | -2.1238974 | 19.7174183 | 3.4206578  |
| H  | -2.9918775 | 18.1872737 | 3.7194514  |
| H  | 0.7098447  | 12.9844943 | 2.8561976  |
| H  | 0.2572507  | 12.9740447 | 3.4882396  |
| H  | -0.3017798 | 9.3747184  | 5.5814906  |
| H  | 0.6884505  | 8.9883261  | 7.0094185  |
| H  | 0.5140783  | 10.6709627 | 6.4793407  |
| H  | 3.9598023  | 6.1666951  | 2.3604156  |
| H  | 1.3022553  | 6.5629819  | 2.0804438  |
| H  | 4.9417450  | 5.9365517  | 6.1677884  |
| H  | 4.9855308  | 4.4819275  | 5.1564623  |
| H  | 5.6735146  | 5.9952102  | 4.5415207  |
| H  | 3.6038526  | 9.6559815  | 2.3617427  |

### Model d:

|    |            |           |           |
|----|------------|-----------|-----------|
| C  | 3.6113995  | 4.7110964 | 3.8293861 |
| C  | 3.7842065  | 5.1025737 | 5.2159902 |
| C  | 5.0596021  | 5.7653990 | 5.3677980 |
| C  | 5.6987906  | 5.7429804 | 4.0866162 |
| C  | 4.8173955  | 5.1005454 | 3.1530164 |
| Fe | 3.9153604  | 6.7492207 | 3.9800104 |
| C  | 3.3926905  | 7.9900894 | 2.4227898 |
| C  | 4.3496215  | 8.6492844 | 3.2716778 |
| C  | 3.7675678  | 8.7175519 | 4.5859217 |
| C  | 2.4705005  | 8.1104447 | 4.5458243 |
| C  | 2.2377219  | 7.6566065 | 3.2062064 |
| C  | 5.6641855  | 9.2329761 | 2.8481774 |
| N  | 2.8859920  | 4.8740490 | 6.2129937 |
| C  | 2.2312152  | 4.4857325 | 7.1338506 |
| Fe | 0.8135589  | 4.6087777 | 8.4355950 |
| C  | -0.3921915 | 4.9760627 | 7.1884133 |

|    |            |            |            |
|----|------------|------------|------------|
| O  | -1.1841011 | 5.2119605  | 6.3791814  |
| C  | 2.4580038  | 3.9392166  | 3.2708251  |
| Ni | 2.6636474  | 2.6048736  | 8.1856835  |
| S  | 3.1564314  | 1.2174107  | 6.4716782  |
| C  | 4.8180167  | 1.4873924  | 6.9022134  |
| N  | 5.8644374  | 0.8864511  | 6.3180038  |
| C  | 7.2449713  | 1.1621512  | 6.7513018  |
| C  | 7.9326633  | 2.2330983  | 5.9019544  |
| S  | 4.9228297  | 2.6087066  | 8.2244325  |
| S  | 2.4003551  | 3.8243398  | 10.0408277 |
| C  | 1.4167147  | 2.7673358  | 11.2954365 |
| N  | 0.9152848  | 1.5171546  | 10.8218278 |
| C  | -0.0860250 | 1.5692198  | 9.8054783  |
| S  | 0.4526542  | 2.2703595  | 8.1081752  |
| C  | 5.6704639  | -0.0866460 | 5.2290339  |
| C  | 5.5659767  | -1.5288000 | 5.7301376  |
| C  | -0.5714738 | 4.6912376  | 9.7706323  |
| N  | -1.4118577 | 4.7378157  | 10.5891906 |
| C  | 1.2258675  | 6.2926380  | 8.8055292  |
| O  | 1.4864796  | 7.3924187  | 9.0506137  |
| H  | 5.0122059  | 4.9497106  | 2.0937471  |
| H  | 6.6745119  | 6.1635395  | 3.8578358  |
| H  | 1.3499889  | 7.1394520  | 2.8513089  |
| H  | 3.5338852  | 7.7683902  | 1.3674816  |
| H  | -0.9236640 | 2.1990034  | 10.1285131 |
| H  | -0.4306955 | 0.5569757  | 9.5643661  |
| H  | 1.6676483  | 0.8666468  | 10.5861176 |
| H  | 2.1348366  | 2.6014000  | 12.1067932 |
| H  | 0.5912797  | 3.4065749  | 11.6309437 |
| H  | 7.2062176  | 1.4712270  | 7.8052911  |
| H  | 7.7961088  | 0.2109082  | 6.7079022  |
| H  | 8.9592074  | 2.3912502  | 6.2627230  |
| H  | 7.9896174  | 1.9374983  | 4.8445295  |
| H  | 7.3916501  | 3.1860773  | 5.9669645  |
| H  | 4.7584038  | 0.1982203  | 4.6857628  |
| H  | 6.5161308  | 0.0301705  | 4.5353518  |
| H  | 5.4397006  | -2.2115142 | 4.8776794  |
| H  | 6.4700770  | -1.8346158 | 6.2758854  |
| H  | 4.6997574  | -1.6449756 | 6.3944236  |
| H  | 1.5144650  | 4.2128337  | 3.7616642  |
| H  | 2.3499526  | 4.1192281  | 2.1927123  |
| H  | 2.6041133  | 2.8574413  | 3.4242093  |
| H  | 4.2434640  | 9.1437584  | 5.4658642  |
| H  | 1.7969789  | 7.9879964  | 5.3893519  |
| H  | 6.1037904  | 8.6719919  | 2.0119725  |
| H  | 5.5349059  | 10.2762570 | 2.5154141  |
| H  | 6.3874140  | 9.2390892  | 3.6757077  |
| H  | 5.4484409  | 6.1719154  | 6.2963759  |

### Model d<sup>+</sup>:

|    |            |           |           |
|----|------------|-----------|-----------|
| C  | 3.6113995  | 4.7110964 | 3.8293861 |
| C  | 3.7842065  | 5.1025737 | 5.2159902 |
| C  | 5.0596021  | 5.7653990 | 5.3677980 |
| C  | 5.6987906  | 5.7429804 | 4.0866162 |
| C  | 4.8173955  | 5.1005454 | 3.1530164 |
| Fe | 3.9153604  | 6.7492207 | 3.9800104 |
| C  | 3.3926905  | 7.9900894 | 2.4227898 |
| C  | 4.3496215  | 8.6492844 | 3.2716778 |
| C  | 3.7675678  | 8.7175519 | 4.5859217 |
| C  | 2.4705005  | 8.1104447 | 4.5458243 |
| C  | 2.2377219  | 7.6566065 | 3.2062064 |
| C  | 5.6641855  | 9.2329761 | 2.8481774 |
| N  | 2.8859920  | 4.8740490 | 6.2129937 |
| C  | 2.2312152  | 4.4857325 | 7.1338506 |
| Fe | 0.8135589  | 4.6087777 | 8.4355950 |
| C  | -0.3921915 | 4.9760627 | 7.1884133 |
| O  | -1.1841011 | 5.2119605 | 6.3791814 |
| C  | 2.4580038  | 3.9392166 | 3.2708251 |
| Ni | 2.6636474  | 2.6048736 | 8.1856835 |
| S  | 3.1564314  | 1.2174107 | 6.4716782 |
| C  | 4.8180167  | 1.4873924 | 6.9022134 |
| N  | 5.8644374  | 0.8864511 | 6.3180038 |

|   |            |            |            |
|---|------------|------------|------------|
| C | 7.2449713  | 1.1621512  | 6.7513018  |
| C | 7.9326633  | 2.2330983  | 5.9019544  |
| S | 4.9228297  | 2.6087066  | 8.2244325  |
| S | 2.4003551  | 3.8243398  | 10.0408277 |
| C | 1.4167147  | 2.7673358  | 11.2954365 |
| N | 0.9152848  | 1.5171546  | 10.8218278 |
| C | -0.0860250 | 1.5692198  | 9.8054783  |
| S | 0.4526542  | 2.2703595  | 8.1081752  |
| C | 5.6704639  | -0.0866460 | 5.2290339  |
| C | 5.5659767  | -1.5288000 | 5.7301376  |
| C | -0.5714738 | 4.6912376  | 9.7706323  |
| N | -1.4118577 | 4.7378157  | 10.5891906 |
| C | 1.2258675  | 6.2926380  | 8.8055292  |
| O | 1.4864796  | 7.3924187  | 9.0506137  |
| H | 5.0122059  | 4.9497106  | 2.0937471  |
| H | 6.6745119  | 6.1635395  | 3.8578358  |
| H | 1.3499889  | 7.1394520  | 2.8513089  |
| H | 3.5338852  | 7.7683902  | 1.3674816  |
| H | -0.9236640 | 2.1990034  | 10.1285131 |
| H | -0.4306955 | 0.5569757  | 9.5643661  |
| H | 1.6676483  | 0.8666468  | 10.5861176 |
| H | 2.1348366  | 2.6014000  | 12.1067932 |
| H | 0.5912797  | 3.4065749  | 11.6309437 |
| H | 7.2062176  | 1.4712270  | 7.8052911  |
| H | 7.7961088  | 0.2109082  | 6.7079022  |
| H | 8.9592074  | 2.3912502  | 6.2627230  |
| H | 7.9896174  | 1.9374983  | 4.8445295  |
| H | 7.3916501  | 3.1860773  | 5.9669645  |
| H | 4.7584038  | 0.1982203  | 4.6857628  |
| H | 6.5161308  | 0.0301705  | 4.5353518  |
| H | 5.4397006  | -2.2115142 | 4.8776794  |
| H | 6.4700770  | -1.8346158 | 6.2758854  |
| H | 4.6997574  | -1.6449756 | 6.3944236  |
| H | 1.5144650  | 4.2128337  | 3.7616642  |
| H | 2.3499526  | 4.1192281  | 2.1927123  |
| H | 2.6041133  | 2.8574413  | 3.4242093  |
| H | 4.2434640  | 9.1437584  | 5.4658642  |
| H | 1.7969789  | 7.9879964  | 5.3893519  |
| H | 6.1037904  | 8.6719919  | 2.0119725  |
| H | 5.5349059  | 10.2762570 | 2.5154141  |
| H | 6.3874140  | 9.2390892  | 3.6757077  |
| H | 5.4484409  | 6.1719154  | 6.2963759  |

### Model $d^+-H_2$ :

|    |           |            |            |
|----|-----------|------------|------------|
| C  | 3.5092861 | 4.7405899  | 3.7283913  |
| C  | 3.7750451 | 5.0761034  | 5.1032100  |
| C  | 5.0719159 | 5.6728170  | 5.1849596  |
| C  | 5.6185939 | 5.7313361  | 3.8669856  |
| C  | 4.6592531 | 5.1596552  | 2.9696471  |
| Fe | 3.8196229 | 6.7903397  | 3.9251872  |
| C  | 3.5525798 | 8.7509975  | 4.6266116  |
| C  | 2.2961215 | 8.0469556  | 4.5330111  |
| C  | 2.1305235 | 7.6761532  | 3.1613083  |
| C  | 3.2881152 | 8.1118082  | 2.4334686  |
| C  | 4.1950568 | 8.7706238  | 3.3300328  |
| C  | 5.4841405 | 9.4473529  | 2.9902808  |
| N  | 4.0696563 | 9.2879727  | 5.7654378  |
| C  | 4.4835810 | 9.8108029  | 6.7473704  |
| Ni | 3.7670517 | 12.1387664 | 7.3011478  |
| S  | 1.5996657 | 11.8506243 | 6.6707219  |
| C  | 2.0634361 | 12.5970679 | 5.1669284  |
| N  | 1.2221182 | 12.9457744 | 4.1971775  |
| C  | 1.6991431 | 13.6369973 | 2.9791860  |
| C  | 1.6256097 | 15.1597466 | 3.0957441  |
| C  | 2.3143696 | 4.0053772  | 3.2047822  |
| Fe | 5.4310243 | 10.0988836 | 8.3690167  |
| S  | 3.5583339 | 11.1887461 | 9.3328592  |
| C  | 4.2584550 | 12.4339079 | 10.5544556 |
| N  | 4.9056069 | 13.5524039 | 9.9085436  |
| C  | 6.1685788 | 13.3038907 | 9.2533787  |

|   |            |            |            |
|---|------------|------------|------------|
| S | 5.9880202  | 12.2979392 | 7.6754327  |
| C | 6.4331379  | 10.2953598 | 9.9940867  |
| N | 7.0428690  | 10.4270455 | 10.9875899 |
| C | 4.8559088  | 8.5333676  | 9.0158987  |
| O | 4.4847597  | 7.5295582  | 9.4398641  |
| C | 6.9394506  | 9.4710551  | 7.6413841  |
| O | 7.9174975  | 9.0718248  | 7.1837330  |
| S | 3.7840792  | 12.8766606 | 5.1445052  |
| C | -0.2318896 | 12.7047640 | 4.3165865  |
| C | -0.6752034 | 11.4002683 | 3.6540725  |
| H | 3.4663287  | 7.9617489  | 1.3716026  |
| H | 1.2794735  | 7.1409830  | 2.7489565  |
| H | 6.5828889  | 6.1500873  | 3.5919616  |
| H | 4.7740591  | 5.0608118  | 1.8929180  |
| H | 6.8915336  | 12.7403311 | 9.8648901  |
| H | 6.6000446  | 14.2597324 | 8.9324701  |
| H | 4.9203405  | 14.3901019 | 10.4906853 |
| H | 3.3896462  | 12.7982518 | 11.1160312 |
| H | 4.9207168  | 11.8446365 | 11.2088537 |
| H | -0.4835619 | 12.7060764 | 5.3864490  |
| H | -0.7356311 | 13.5693281 | 3.8617728  |
| H | -1.7634816 | 11.2884329 | 3.7565672  |
| H | -0.4366542 | 11.3875083 | 2.5814575  |
| H | -0.1954655 | 10.5349843 | 4.1303380  |
| H | 2.7312856  | 13.3100061 | 2.7911492  |
| H | 1.0831097  | 13.2724543 | 2.1448013  |
| H | 1.9705407  | 15.6165398 | 2.1579002  |
| H | 0.5983620  | 15.5046298 | 3.2776334  |
| H | 2.2669358  | 15.5227589 | 3.9092465  |
| H | 6.2130894  | 9.3725772  | 3.8081707  |
| H | 5.9316108  | 9.0114689  | 2.0883958  |
| H | 5.3144061  | 10.5190101 | 2.7984153  |
| H | 3.1002745  | 4.9016095  | 5.9374901  |
| H | 5.5435916  | 6.0504434  | 6.0881558  |
| H | 2.1071706  | 4.2605599  | 2.1570780  |
| H | 2.4947839  | 2.9193684  | 3.2492382  |
| H | 1.4158292  | 4.2132657  | 3.8007002  |
| H | 1.6082006  | 7.8744051  | 5.3550863  |
| H | 3.6663224  | 13.9413242 | 8.3482283  |
| H | 3.2084668  | 13.9889897 | 7.7109187  |

### Model $d^+-2H$ :

|    |           |            |            |
|----|-----------|------------|------------|
| C  | 3.4860523 | 4.7359911  | 3.6095857  |
| C  | 3.7372452 | 5.0065651  | 5.0001743  |
| C  | 5.0313842 | 5.6068459  | 5.1218985  |
| C  | 5.5922831 | 5.7234277  | 3.8094564  |
| C  | 4.6412596 | 5.1876018  | 2.8802301  |
| Fe | 3.8132410 | 6.7670875  | 3.9136088  |
| C  | 3.6057845 | 8.6407698  | 4.7070519  |
| C  | 2.3185938 | 7.9892457  | 4.5945816  |
| C  | 2.1236488 | 7.7055204  | 3.2062092  |
| C  | 3.2802262 | 8.1491579  | 2.4825120  |
| C  | 4.2278612 | 8.7217211  | 3.3961055  |
| C  | 5.5245439 | 9.3912659  | 3.0672818  |
| N  | 4.1443071 | 9.1342099  | 5.8629221  |
| C  | 4.5910588 | 9.6167926  | 6.8432734  |
| Ni | 3.7162251 | 12.2848884 | 7.3395477  |
| S  | 1.5635353 | 12.0331081 | 6.7457354  |
| C  | 2.0236541 | 12.6992003 | 5.2046557  |
| N  | 1.1892340 | 13.0008950 | 4.2152583  |
| C  | 1.6787869 | 13.6110281 | 2.9598657  |
| C  | 1.5927059 | 15.1374620 | 2.9708116  |
| C  | 2.2912100 | 4.0345796  | 3.0397611  |
| Fe | 5.5118345 | 10.0337211 | 8.4579146  |
| S  | 3.5893572 | 11.1370222 | 9.3113805  |
| C  | 4.2202512 | 12.3962143 | 10.5112947 |
| N  | 4.8770323 | 13.5496307 | 9.8175730  |
| C  | 6.1813298 | 13.2878051 | 9.1316705  |
| S  | 5.9685697 | 12.2164643 | 7.6375013  |

|   |            |            |            |
|---|------------|------------|------------|
| C | 6.4713690  | 10.4157271 | 10.0708999 |
| N | 7.0329847  | 10.7207061 | 11.0553945 |
| C | 5.0012994  | 8.4828519  | 9.1890360  |
| O | 4.6691699  | 7.4912859  | 9.6683062  |
| C | 7.0411829  | 9.3953971  | 7.7879782  |
| O | 8.0326572  | 8.9921968  | 7.3659932  |
| S | 3.7459930  | 12.9527507 | 5.1848538  |
| C | -0.2632607 | 12.7503396 | 4.3328329  |
| C | -0.6851988 | 11.4136160 | 3.7220736  |
| H | 3.4365269  | 8.0456492  | 1.4116340  |
| H | 1.2565017  | 7.2089951  | 2.7791175  |
| H | 6.5607166  | 6.1489952  | 3.5610515  |
| H | 4.7620766  | 5.1394441  | 1.8007261  |
| H | 6.8832203  | 12.8106332 | 9.8264877  |
| H | 6.5570636  | 14.2557179 | 8.7785763  |
| H | 4.9757834  | 14.3406257 | 10.4688083 |
| H | 3.3462793  | 12.7974665 | 11.0386939 |
| H | 4.9267809  | 11.9231181 | 11.2039265 |
| H | -0.5228534 | 12.7939536 | 5.4000514  |
| H | -0.7721230 | 13.5900688 | 3.8389398  |
| H | -1.7715900 | 11.2894422 | 3.8296047  |
| H | -0.4468656 | 11.3625802 | 2.6506518  |
| H | -0.1909755 | 10.5752020 | 4.2301491  |
| H | 2.7157864  | 13.2791995 | 2.8096723  |
| H | 1.0784787  | 13.1849006 | 2.1434859  |
| H | 1.9499311  | 15.5305823 | 2.0090863  |
| H | 0.5602193  | 15.4860452 | 3.1112909  |
| H | 2.2174196  | 15.5610735 | 3.7678493  |
| H | 6.2675228  | 9.2570030  | 3.8651816  |
| H | 5.9476867  | 8.9877152  | 2.1385895  |
| H | 5.3800775  | 10.4751019 | 2.9270246  |
| H | 3.0528593  | 4.7933231  | 5.8174644  |
| H | 5.4961615  | 5.9375617  | 6.0469172  |
| H | 2.0926397  | 4.3477014  | 2.0058919  |
| H | 2.4618028  | 2.9459530  | 3.0271828  |
| H | 1.3891576  | 4.2189627  | 3.6386216  |
| H | 1.6359369  | 7.7894174  | 5.4149988  |
| H | 3.4616291  | 13.7621845 | 7.9183518  |
| H | 4.1630936  | 13.8061184 | 8.9639943  |

### Model $d_{TS}^+ - H_2$ :

|    |            |            |            |
|----|------------|------------|------------|
| C  | 4.1852892  | 8.7343431  | 3.3932462  |
| C  | 3.5790677  | 8.6482386  | 4.7101019  |
| C  | 2.3037750  | 7.9724666  | 4.6145364  |
| C  | 2.0976488  | 7.6805605  | 3.2294906  |
| C  | 3.2382903  | 8.1417328  | 2.4916221  |
| Fe | 3.8092641  | 6.7681203  | 3.9164587  |
| C  | 4.6487783  | 5.2006243  | 2.8726562  |
| C  | 3.5073536  | 4.7321407  | 3.6132741  |
| C  | 3.7703457  | 5.0031154  | 5.0017139  |
| C  | 5.0580103  | 5.6184846  | 5.1107494  |
| C  | 5.6028722  | 5.7458912  | 3.7931503  |
| C  | 2.3161975  | 4.0153665  | 3.0551220  |
| N  | 4.1244239  | 9.1454740  | 5.8601242  |
| C  | 4.5677413  | 9.6261201  | 6.8439577  |
| Fe | 5.4851624  | 10.0158115 | 8.4665000  |
| C  | 7.0128559  | 9.3644095  | 7.8045786  |
| O  | 8.0038302  | 8.9535977  | 7.3886095  |
| C  | 5.4673875  | 9.4236222  | 3.0488899  |
| Ni | 3.7304157  | 12.2461381 | 7.3456503  |
| S  | 3.7603619  | 12.9508560 | 5.2018970  |
| C  | 2.0399452  | 12.6784327 | 5.2106441  |
| N  | 1.2071387  | 12.9879982 | 4.2224973  |
| C  | -0.2437003 | 12.7224408 | 4.3300144  |
| C  | -0.6499246 | 11.3877799 | 3.7044335  |
| S  | 1.5772010  | 11.9809197 | 6.7369441  |
| S  | 3.5741530  | 11.1336247 | 9.3233938  |
| C  | 4.2116905  | 12.4100860 | 10.5111447 |
| N  | 4.8645851  | 13.5427624 | 9.8053198  |
| C  | 6.1731998  | 13.2692792 | 9.1576632  |
| S  | 5.9846168  | 12.1918755 | 7.6570684  |

|   |            |            |            |
|---|------------|------------|------------|
| C | 1.6943877  | 13.6297879 | 2.9818630  |
| C | 1.5961329  | 15.1548425 | 3.0277385  |
| C | 6.4369371  | 10.3717088 | 10.0907197 |
| N | 6.9955170  | 10.6542177 | 11.0833977 |
| C | 4.9456168  | 8.4661576  | 9.1789739  |
| O | 4.5938140  | 7.4738483  | 9.6427363  |
| H | 3.3842483  | 8.0390179  | 1.4192356  |
| H | 1.2335572  | 7.1690646  | 2.8140613  |
| H | 6.5629674  | 6.1846885  | 3.5356987  |
| H | 4.7590406  | 5.1560104  | 1.7918872  |
| H | 6.8628592  | 12.7791381 | 9.8571070  |
| H | 6.5745765  | 14.2272123 | 8.8058636  |
| H | 4.9339246  | 14.3599385 | 10.4246225 |
| H | 3.3360522  | 12.8099116 | 11.0366564 |
| H | 4.9091075  | 11.9261970 | 11.2070490 |
| H | -0.5096350 | 12.7534945 | 5.3960910  |
| H | -0.7575535 | 13.5620093 | 3.8410821  |
| H | -1.7358542 | 11.2531135 | 3.8037804  |
| H | -0.4040939 | 11.3486421 | 2.6342155  |
| H | -0.1518252 | 10.5491223 | 4.2083569  |
| H | 2.7341132  | 13.3096447 | 2.8257571  |
| H | 1.0984401  | 13.2175918 | 2.1552060  |
| H | 1.9505651  | 15.5731469 | 2.0756432  |
| H | 0.5608165  | 15.4915134 | 3.1759647  |
| H | 2.2171821  | 15.5648221 | 3.8346938  |
| H | 6.2192793  | 9.3068241  | 3.8411362  |
| H | 5.8888281  | 9.0227772  | 2.1183378  |
| H | 5.3026564  | 10.5040345 | 2.9053183  |
| H | 3.0977408  | 4.7798315  | 5.8260544  |
| H | 5.5280345  | 5.9541061  | 6.0313018  |
| H | 2.1033024  | 4.3256823  | 2.0233263  |
| H | 2.5015955  | 2.9292106  | 3.0407090  |
| H | 1.4177976  | 4.1871099  | 3.6630933  |
| H | 1.6344185  | 7.7638294  | 5.4436571  |
| H | 3.4852767  | 13.7496690 | 7.9405247  |
| H | 4.1012320  | 13.7597635 | 8.8366250  |

### Model e:

|    |           |           |           |
|----|-----------|-----------|-----------|
| C  | 5.5434218 | 5.6825439 | 4.1765084 |
| C  | 4.5525935 | 5.1503320 | 3.2778994 |
| C  | 3.3372054 | 4.9371160 | 4.0309169 |
| C  | 3.6197858 | 5.3211790 | 5.4035168 |
| C  | 4.9761333 | 5.8080069 | 5.4833444 |
| Fe | 3.9033908 | 6.9126963 | 4.1257953 |
| C  | 2.4041529 | 8.3003394 | 4.4377719 |
| C  | 2.5318585 | 8.0089765 | 3.0404684 |
| C  | 3.8669346 | 8.3468021 | 2.6408032 |
| C  | 4.5767164 | 8.8474353 | 3.7869829 |
| C  | 3.6613737 | 8.8122178 | 4.8971158 |
| H  | 1.7583829 | 7.5901033 | 2.4019819 |
| C  | 5.9776736 | 9.3802242 | 3.8074937 |
| C  | 2.0279322 | 4.3780037 | 3.5517275 |
| N  | 1.8155252 | 2.9780591 | 3.9472128 |
| C  | 0.4465693 | 2.5602581 | 3.6607947 |
| N  | 2.7436710 | 5.2569436 | 6.4409968 |
| C  | 2.0822023 | 5.1124140 | 7.4245176 |
| Ni | 2.4331514 | 3.5750113 | 8.9306427 |
| S  | 4.6894586 | 3.5690772 | 9.1185659 |
| C  | 4.6200783 | 2.0922035 | 8.2042824 |
| N  | 5.6693840 | 1.2916264 | 7.9605287 |
| C  | 7.0191997 | 1.6269233 | 8.4426921 |
| C  | 7.8767285 | 2.3191893 | 7.3809428 |
| C  | 2.7820601 | 2.0724674 | 3.3388422 |
| Fe | 0.6171643 | 5.5955947 | 8.6005991 |

|   |            |            |            |
|---|------------|------------|------------|
| C | -0.8304178 | 6.0140201  | 9.7974961  |
| N | -1.7106655 | 6.2599901  | 10.5345575 |
| S | 0.2187260  | 3.2563295  | 8.8225431  |
| C | -0.4517865 | 2.9703814  | 10.5289167 |
| C | 0.5557083  | 3.1388204  | 11.6611854 |
| C | 1.0841258  | 4.5583405  | 11.8368512 |
| S | 2.1017914  | 5.2034578  | 10.4256234 |
| S | 2.9944940  | 1.7670276  | 7.6987932  |
| C | 1.0809811  | 7.3055021  | 8.5826943  |
| O | 1.3807558  | 8.4229964  | 8.5748571  |
| C | -0.5046396 | 5.7005226  | 7.2347513  |
| O | -1.2364577 | 5.7823227  | 6.3416064  |
| C | 5.4972881  | 0.0219232  | 7.2339792  |
| C | 5.2037946  | -1.1600289 | 8.1616730  |
| C | 4.7793258  | 4.8322865  | 1.8300303  |
| H | 6.5551123  | 5.9675849  | 3.8961788  |
| H | 4.2839829  | 8.2273541  | 1.6433734  |
| H | -1.3045196 | 3.6524198  | 10.6510497 |
| H | -0.8196992 | 1.9351834  | 10.4990018 |
| H | 1.3972107  | 2.4406311  | 11.5211614 |
| H | 0.0512021  | 2.8526120  | 12.6017185 |
| H | 1.7655983  | 4.6070849  | 12.6977351 |
| H | 0.2631849  | 5.2730715  | 11.9861686 |
| H | 6.9047690  | 2.2707373  | 9.3258091  |
| H | 7.4889325  | 0.6898201  | 8.7778755  |
| H | 8.8755214  | 2.5318924  | 7.7884556  |
| H | 8.0036231  | 1.6894419  | 6.4890150  |
| H | 7.4203441  | 3.2693103  | 7.0731197  |
| H | 4.6776600  | 0.1580786  | 6.5143270  |
| H | 6.4173702  | -0.1494391 | 6.6560574  |
| H | 5.0939194  | -2.0807487 | 7.5707656  |
| H | 6.0159588  | -1.3184501 | 8.8854572  |
| H | 4.2698025  | -0.9920750 | 8.7135633  |
| H | 1.9577733  | 4.5069227  | 2.4458138  |
| H | 3.8921537  | 9.1108099  | 5.9166123  |
| H | 1.5195571  | 8.1379113  | 5.0474320  |
| H | 6.5997340  | 8.9085032  | 3.0343262  |
| H | 5.9806440  | 10.4665960 | 3.6185727  |
| H | 6.4572488  | 9.2143315  | 4.7822061  |
| H | 5.4562398  | 6.1777024  | 6.3842505  |
| H | 1.2055788  | 4.9631736  | 3.9901635  |
| H | 2.6142140  | 1.0534053  | 3.7156156  |
| H | 2.7109151  | 2.0450309  | 2.2260269  |
| H | 3.8017204  | 2.3730359  | 3.6137944  |
| H | 0.2894960  | 1.5380347  | 4.0328782  |
| H | -0.2625778 | 3.2223426  | 4.1762919  |
| H | 0.2065323  | 2.5714268  | 2.5724408  |
| H | 5.1113658  | 3.7884618  | 1.7016976  |
| H | 3.8653388  | 4.9607427  | 1.2349985  |
| H | 5.5564402  | 5.4818610  | 1.4039736  |

### Model e<sup>+</sup>:

|    |           |           |           |
|----|-----------|-----------|-----------|
| C  | 5.5256858 | 5.8404744 | 3.9962821 |
| C  | 4.5194218 | 5.2616821 | 3.1495083 |
| C  | 3.3478831 | 5.0191604 | 3.9503403 |
| C  | 3.6698710 | 5.4328868 | 5.3017423 |
| C  | 5.0121770 | 5.9655887 | 5.3250689 |
| Fe | 3.8549075 | 7.0599368 | 4.0285580 |
| C  | 2.3217584 | 8.4077193 | 4.3541309 |
| C  | 2.4485148 | 8.1460520 | 2.9512035 |
| C  | 3.7623691 | 8.5452836 | 2.5488259 |
| C  | 4.4591687 | 9.0635733 | 3.6898285 |
| C  | 3.5633557 | 8.9633442 | 4.8091800 |
| H  | 1.6867363 | 7.7126653 | 2.3087008 |
| C  | 5.8376877 | 9.6464361 | 3.7045697 |
| C  | 2.0383351 | 4.4119108 | 3.5306193 |
| N  | 1.8971816 | 3.0131692 | 3.9593631 |
| C  | 0.5249479 | 2.5451811 | 3.7586430 |
| N  | 2.8437868 | 5.3315289 | 6.3782615 |
| C  | 2.1654458 | 5.1874538 | 7.3443108 |
| Ni | 2.4713990 | 3.5381076 | 8.8675460 |
| S  | 4.7260555 | 3.5058770 | 9.0795291 |
| C  | 4.6287899 | 1.9726916 | 8.2580259 |



|    |            |            |            |
|----|------------|------------|------------|
| N  | 5.6374765  | 1.1184262  | 8.1127970  |
| C  | 6.9892595  | 1.4265842  | 8.6279411  |
| C  | 7.9096047  | 2.0182296  | 7.5595282  |
| C  | 2.8597505  | 2.1266127  | 3.3089767  |
| Fe | 0.7505818  | 5.5729296  | 8.5872953  |
| C  | -0.6913381 | 6.0096970  | 9.7740500  |
| N  | -1.5714537 | 6.2643013  | 10.5061860 |
| S  | 0.2522121  | 3.2726426  | 8.7212756  |
| C  | -0.4224135 | 2.9289281  | 10.4148728 |
| C  | 0.5809762  | 3.0368088  | 11.5575976 |
| C  | 1.1405795  | 4.4352007  | 11.7934987 |
| S  | 2.1749036  | 5.1261199  | 10.4168783 |
| S  | 2.9932069  | 1.6818462  | 7.7212011  |
| C  | 1.2317742  | 7.2959396  | 8.6527371  |
| O  | 1.5355299  | 8.4058371  | 8.6994722  |
| C  | -0.4187385 | 5.7440832  | 7.2455762  |
| O  | -1.1811929 | 5.8562177  | 6.3891936  |
| C  | 5.4409241  | -0.2020733 | 7.4745131  |
| C  | 5.1353604  | -1.3073038 | 8.4872561  |
| C  | 4.6920133  | 4.9474172  | 1.6946959  |
| H  | 6.5160407  | 6.1491764  | 3.6701413  |
| H  | 4.1775292  | 8.4523803  | 1.5480249  |
| H  | -1.2658789 | 3.6198607  | 10.5524580 |
| H  | -0.8078449 | 1.9031446  | 10.3378441 |
| H  | 1.4032767  | 2.3186882  | 11.4092960 |
| H  | 0.0589257  | 2.7333062  | 12.4816006 |
| H  | 1.8243942  | 4.4348678  | 12.6533828 |
| H  | 0.3398985  | 5.1662999  | 11.9714855 |
| H  | 6.8731897  | 2.1197034  | 9.4724834  |
| H  | 7.3996333  | 0.4882951  | 9.0266680  |
| H  | 8.8999465  | 2.2089392  | 7.9954938  |
| H  | 8.0438564  | 1.3321235  | 6.7119447  |
| H  | 7.5123724  | 2.9696821  | 7.1823889  |
| H  | 4.6233547  | -0.1032878 | 6.7472958  |
| H  | 6.3585395  | -0.4225536 | 6.9111122  |
| H  | 5.0226538  | -2.2649256 | 7.9606213  |
| H  | 5.9444659  | -1.4236466 | 9.2215912  |
| H  | 4.2009689  | -1.0986598 | 9.0242170  |
| H  | 1.9223122  | 4.5199184  | 2.4280540  |
| H  | 3.7934582  | 9.2650165  | 5.8278885  |
| H  | 1.4429723  | 8.2178156  | 4.9639124  |
| H  | 6.4724142  | 9.2113194  | 2.9214908  |
| H  | 5.7836764  | 10.7312835 | 3.5192080  |
| H  | 6.3296563  | 9.5042264  | 4.6757826  |
| H  | 5.5259075  | 6.3470722  | 6.2023241  |
| H  | 1.2139172  | 4.9764558  | 3.9911160  |
| H  | 2.7313498  | 1.1069023  | 3.6957884  |
| H  | 2.7360899  | 2.0931584  | 2.2038286  |
| H  | 3.8848397  | 2.4481620  | 3.5364475  |
| H  | 0.4286044  | 1.5233132  | 4.1493794  |
| H  | -0.1754216 | 3.1886795  | 4.3080951  |
| H  | 0.2233578  | 2.5342719  | 2.6888434  |
| H  | 5.0570651  | 3.9157196  | 1.5668479  |
| H  | 3.7496068  | 5.0321980  | 1.1389277  |
| H  | 5.4284963  | 5.6163636  | 1.2306656  |

### Model e<sup>+</sup>-2H:

|    |           |            |           |
|----|-----------|------------|-----------|
| C  | 4.0109529 | 9.4556436  | 4.2690573 |
| C  | 3.1186031 | 9.7147932  | 5.3657559 |
| C  | 1.7862047 | 9.8674924  | 4.8135926 |
| C  | 1.8993295 | 9.6939022  | 3.3709311 |
| C  | 3.2749776 | 9.4297742  | 3.0433409 |
| Fe | 2.5317799 | 8.0223457  | 4.3408201 |
| C  | 1.4509788 | 6.4101742  | 3.6167958 |
| C  | 1.2312709 | 6.5654057  | 5.0231107 |
| C  | 2.4993907 | 6.4503339  | 5.6829030 |
| C  | 3.5136100 | 6.2186090  | 4.6907405 |
| C  | 2.8524751 | 6.2029703  | 3.4127794 |
| C  | 4.9650807 | 5.9478534  | 4.9440874 |
| C  | 0.5125899 | 10.1570899 | 5.5253356 |
| N  | 0.0936383 | 11.6326670 | 5.4985648 |
| C  | 1.1222771 | 12.5456372 | 6.0769983 |
| N  | 0.8574095 | 9.8250619  | 2.4955372 |

|    |            |            |            |
|----|------------|------------|------------|
| C  | -0.1273512 | 10.1163287 | 1.9036262  |
| Fe | -1.6433429 | 10.3145759 | 0.8434548  |
| C  | -3.1692695 | 10.4008045 | -0.3272468 |
| N  | -4.0957306 | 10.4126752 | -1.0463729 |
| C  | -0.8292389 | 9.4875101  | -0.5198511 |
| O  | -0.3083340 | 8.9663588  | -1.4040010 |
| C  | -2.4091359 | 8.8575861  | 1.5439279  |
| O  | -2.9107494 | 7.9314918  | 2.0129122  |
| S  | -0.8562182 | 12.4551645 | 0.1979055  |
| Ni | -1.0161752 | 13.2851690 | 2.3328639  |
| S  | -1.7125692 | 14.7917702 | 3.9640759  |
| C  | -0.4258279 | 15.7995402 | 3.3445162  |
| N  | -0.1810160 | 17.0458996 | 3.7511539  |
| C  | 0.9181569  | 17.8429435 | 3.1644850  |
| C  | 2.2177004  | 17.7397611 | 3.9645415  |
| S  | -2.6852405 | 11.7819765 | 2.4068120  |
| C  | -3.9596345 | 12.7378473 | 1.4341549  |
| C  | -3.3718927 | 13.7948198 | 0.4955879  |
| C  | -2.3340464 | 13.3287029 | -0.5288727 |
| S  | 0.4635449  | 14.9757365 | 2.0956251  |
| C  | -1.0219317 | 17.7076695 | 4.7718686  |
| C  | -2.1554982 | 18.5327040 | 4.1606470  |
| C  | -1.2388751 | 11.8116492 | 6.1526176  |
| C  | 3.5278526  | 9.8653118  | 6.8008845  |
| H  | 5.0789494  | 9.2757469  | 4.3635055  |
| H  | 0.2712843  | 6.7334423  | 5.5049334  |
| H  | 2.6716829  | 6.5229039  | 6.7540592  |
| H  | -4.5620032 | 11.9957825 | 0.8972866  |
| H  | -4.5763492 | 13.2270286 | 2.2005252  |
| H  | -2.9384982 | 14.6088744 | 1.1019945  |
| H  | -4.2126853 | 14.2401220 | -0.0637285 |
| H  | -1.9076922 | 14.2013323 | -1.0421074 |
| H  | -2.7656370 | 12.6469191 | -1.2708132 |
| H  | 1.0671826  | 17.4991557 | 2.1315215  |
| H  | 0.5666162  | 18.8832591 | 3.1165726  |
| H  | 2.9856148  | 18.3743154 | 3.5009596  |
| H  | 2.0843766  | 18.0789663 | 5.0013727  |
| H  | 2.5907484  | 16.7069754 | 3.9754572  |
| H  | -1.4245522 | 16.9263516 | 5.4309445  |
| H  | -0.3531703 | 18.3391768 | 5.3739222  |
| H  | -2.7278159 | 19.0203553 | 4.9619019  |
| H  | -1.7746775 | 19.3200827 | 3.4954287  |
| H  | -2.8409369 | 17.8926634 | 3.5901139  |
| H  | -0.0289139 | 12.3819865 | 3.1500582  |
| H  | -0.3276401 | 9.6170090  | 5.0686467  |
| H  | 0.5709975  | 9.8735106  | 6.5851403  |
| H  | 3.3428557  | 6.0668092  | 2.4520867  |
| H  | 0.6932124  | 6.4628489  | 2.8396224  |
| H  | 5.3207878  | 6.4506979  | 5.8533971  |
| H  | 5.1273581  | 4.8666250  | 5.0817375  |
| H  | 5.5917942  | 6.2681882  | 4.1009650  |
| H  | 3.6641548  | 9.2549234  | 2.0449521  |
| H  | 0.7736498  | 13.5765449 | 5.9503065  |
| H  | 1.2549855  | 12.3171320 | 7.1417063  |
| H  | 2.0635471  | 12.4040267 | 5.5363383  |
| H  | -1.5257085 | 12.8661042 | 6.0726429  |
| H  | -1.9779464 | 11.1946409 | 5.6287580  |
| H  | -1.1689049 | 11.5112815 | 7.2053777  |
| H  | -0.0200554 | 11.9377233 | 4.4523775  |
| H  | 3.7964434  | 10.9092859 | 7.0328021  |
| H  | 2.7330054  | 9.5607639  | 7.4965372  |
| H  | 4.4101997  | 9.2499908  | 7.019683   |

Model  $\text{disp}^b$ :

|    |           |           |           |
|----|-----------|-----------|-----------|
| C  | 6.4702769 | 4.2733249 | 4.1809208 |
| N  | 6.3939829 | 4.3591290 | 5.3514349 |
| Fe | 6.4417490 | 4.3429097 | 2.2251744 |

|    |            |           |            |
|----|------------|-----------|------------|
| C  | 6.4066876  | 6.1060864 | 2.3185864  |
| O  | 6.3836839  | 7.2652781 | 2.3724340  |
| S  | 8.8326766  | 4.2808289 | 2.2871443  |
| Ni | 8.4854887  | 2.4935247 | 3.5630201  |
| S  | 9.8290297  | 3.1320846 | 5.2420246  |
| C  | 8.6535543  | 2.1231009 | 6.0359192  |
| N  | 8.1264703  | 2.4082695 | 7.2343310  |
| C  | 7.0913748  | 1.5576965 | 7.8416065  |
| C  | 5.6834861  | 2.0016539 | 7.4444770  |
| C  | 9.3551815  | 3.5947599 | 0.6426981  |
| C  | 9.1257825  | 2.0928454 | 0.4841935  |
| C  | 7.6653102  | 1.6509104 | 0.5404001  |
| S  | 6.8362520  | 1.9824018 | 2.1683302  |
| C  | 6.4115885  | 4.4563259 | 0.3027999  |
| N  | 6.3897924  | 4.5314775 | -0.8705259 |
| C  | 4.6910386  | 4.1117557 | 2.2478155  |
| O  | 3.5406814  | 3.9555982 | 2.2592247  |
| S  | 8.0762131  | 0.8211970 | 5.0195752  |
| C  | 8.3776125  | 3.7002944 | 7.8919693  |
| C  | 9.6481961  | 3.6710510 | 8.7415782  |
| H  | 8.8181559  | 4.1572653 | -0.1333889 |
| H  | 10.4328212 | 3.8089872 | 0.5750782  |
| H  | 9.6896434  | 1.5600231 | 1.2697295  |
| H  | 9.5359745  | 1.7885102 | -0.4978766 |
| H  | 7.6066487  | 0.5594302 | 0.4084748  |
| H  | 7.0733655  | 2.1489383 | -0.2396832 |
| H  | 7.2736165  | 0.5205221 | 7.5268465  |
| H  | 7.2373481  | 1.6147997 | 8.9332313  |
| H  | 4.9364968  | 1.3595997 | 7.9391290  |
| H  | 5.5090815  | 3.0497055 | 7.7248178  |
| H  | 5.5714565  | 1.9338018 | 6.3548152  |
| H  | 8.4272728  | 4.4673029 | 7.1064848  |
| H  | 7.4915760  | 3.9181577 | 8.5048094  |
| H  | 9.7882254  | 4.6388974 | 9.2488860  |
| H  | 9.5931760  | 2.8798216 | 9.5070487  |
| H  | 10.5225179 | 3.4823708 | 8.1018234  |
| H  | 5.6505169  | 5.3624847 | 7.4413433  |
| H  | 5.4257929  | 5.6443928 | 8.1076309  |

### Model <sup>solvr</sup>b:

|    |            |           |            |
|----|------------|-----------|------------|
| C  | 7.8251196  | 1.7559834 | 0.7272223  |
| C  | 9.2221594  | 2.3140401 | 0.9792228  |
| C  | 9.3405995  | 3.8345997 | 0.9374670  |
| S  | 8.3381220  | 4.7326531 | 2.2227561  |
| Fe | 6.0524826  | 4.5625693 | 1.5590666  |
| C  | 5.5646349  | 4.7249357 | 3.4494786  |
| N  | 5.0849611  | 4.9669253 | 4.4978868  |
| Ni | 7.6334513  | 3.2026877 | 3.6703401  |
| S  | 7.0188332  | 1.7276772 | 5.2638515  |
| C  | 7.9189809  | 2.7332893 | 6.3624518  |
| N  | 7.9849990  | 2.5581035 | 7.6850783  |
| C  | 8.7785283  | 3.4609044 | 8.5404629  |
| C  | 10.1895568 | 2.9336708 | 8.8074841  |
| S  | 6.5446340  | 2.2642469 | 1.9778363  |
| S  | 8.7012806  | 4.0150984 | 5.4821334  |
| C  | 6.5015675  | 4.4296490 | -0.3069336 |
| N  | 6.7209238  | 4.3916560 | -1.4628717 |
| C  | 4.3703168  | 4.1853719 | 1.1822836  |
| O  | 3.2663483  | 3.9289148 | 0.9305010  |
| C  | 5.9076218  | 6.3145025 | 1.4031117  |
| O  | 5.8162631  | 7.4675210 | 1.3023749  |
| C  | 7.2524838  | 1.4630132 | 8.3499901  |
| C  | 5.8660108  | 1.8917827 | 8.8333598  |
| H  | 9.0401797  | 4.2346464 | -0.0397818 |
| H  | 10.3783248 | 4.1344592 | 1.1391887  |
| H  | 9.5894738  | 1.9470813 | 1.9514181  |
| H  | 9.8933365  | 1.9037573 | 0.2029371  |
| H  | 7.8448555  | 0.6586996 | 0.7830970  |
| H  | 7.4457382  | 2.0528600 | -0.2590586 |
| H  | 7.1744774  | 0.6302185 | 7.6378755  |

|   |            |           |           |
|---|------------|-----------|-----------|
| H | 7.8743815  | 1.1217286 | 9.1899232 |
| H | 5.3750376  | 1.0475920 | 9.3383871 |
| H | 5.9291199  | 2.7254703 | 9.5470717 |
| H | 5.2383846  | 2.2015972 | 7.9867727 |
| H | 8.8167835  | 4.4408514 | 8.0455546 |
| H | 8.2223592  | 3.5870366 | 9.4805249 |
| H | 10.7265521 | 3.6355698 | 9.4615071 |
| H | 10.1663649 | 1.9546973 | 9.3071663 |
| H | 10.7531231 | 2.8365450 | 7.8695672 |

Model <sup>disp</sup>**b**:

|    |            |           |            |
|----|------------|-----------|------------|
| C  | 4.6786573  | 5.4048625 | 2.2649623  |
| N  | 3.9297719  | 5.7653967 | 3.0990168  |
| Fe | 5.9093783  | 4.7580905 | 0.9471230  |
| C  | 6.0116388  | 6.3951178 | 0.2355630  |
| O  | 6.0947416  | 7.4538914 | -0.2112919 |
| S  | 7.6969231  | 5.1775836 | 2.4285583  |
| Ni | 6.9252975  | 3.7493674 | 3.9976329  |
| S  | 8.4172568  | 4.2594913 | 5.6740060  |
| C  | 7.8048812  | 2.8246202 | 6.4531506  |
| N  | 8.1915599  | 2.3958934 | 7.6544349  |
| C  | 7.5818661  | 1.2089099 | 8.2836792  |
| C  | 6.3469557  | 1.5937213 | 9.0989730  |
| C  | 9.0798319  | 4.0901400 | 1.8229808  |
| C  | 8.8935087  | 2.5906589 | 2.0871483  |
| C  | 7.5927414  | 1.9368616 | 1.6034354  |
| S  | 6.0187589  | 2.7570832 | 2.1758706  |
| C  | 7.0718745  | 4.1194058 | -0.4453259 |
| N  | 7.7909822  | 3.7154111 | -1.2815309 |
| C  | 4.5246317  | 4.1920839 | -0.0342891 |
| O  | 3.6363981  | 3.8074534 | -0.6588608 |
| S  | 6.6023795  | 2.0307343 | 5.4742613  |
| C  | 9.2169532  | 3.0979804 | 8.4465212  |
| C  | 10.5962688 | 2.4703018 | 8.2482041  |
| H  | 9.1846194  | 4.2995883 | 0.7511975  |
| H  | 9.9718763  | 4.4377222 | 2.3637550  |
| H  | 9.0074097  | 2.4041062 | 3.1693197  |
| H  | 9.7255520  | 2.0663879 | 1.5852627  |
| H  | 7.5401433  | 0.9140047 | 2.0026225  |
| H  | 7.5389918  | 1.9177682 | 0.5076637  |
| H  | 7.3249930  | 0.4895736 | 7.4935983  |
| H  | 8.3576417  | 0.7531523 | 8.9166612  |
| H  | 5.9244763  | 0.7033640 | 9.5871692  |
| H  | 6.6051998  | 2.3276131 | 9.8767091  |
| H  | 5.5825268  | 2.0286411 | 8.4398112  |
| H  | 9.2178816  | 4.1563012 | 8.1508383  |
| H  | 8.8981345  | 3.0404439 | 9.4985420  |
| H  | 11.3372838 | 2.9830166 | 8.8789399  |
| H  | 10.5862659 | 1.4051082 | 8.5245366  |
| H  | 10.9060056 | 2.5603207 | 7.1974938  |
| H  | 5.3736244  | 4.7972287 | 4.2128024  |
| H  | 5.8040001  | 4.7281511 | 4.8832376  |

Model <sup>solv</sup>**b**:

|    |           |           |           |
|----|-----------|-----------|-----------|
| C  | 4.6552405 | 5.3845219 | 2.2563713 |
| N  | 3.8634118 | 5.7721666 | 3.0363369 |
| Fe | 5.8900105 | 4.7550518 | 0.9239373 |

|    |            |           |            |
|----|------------|-----------|------------|
| C  | 5.9485068  | 6.3957352 | 0.2326623  |
| O  | 5.9975514  | 7.4623806 | -0.2063000 |
| S  | 7.7069582  | 5.1693169 | 2.3903527  |
| Ni | 6.9792189  | 3.7126654 | 3.9875926  |
| S  | 8.4250439  | 4.2461176 | 5.6875207  |
| C  | 7.8152934  | 2.8078373 | 6.4751140  |
| N  | 8.1775950  | 2.3930308 | 7.6795323  |
| C  | 7.5318486  | 1.2211668 | 8.3156100  |
| C  | 6.3341895  | 1.6269460 | 9.1754863  |
| C  | 9.1024085  | 4.1042450 | 1.7720571  |
| C  | 8.9329774  | 2.6080270 | 2.0495281  |
| C  | 7.6475157  | 1.9364216 | 1.5579487  |
| S  | 6.0648760  | 2.7373165 | 2.1370702  |
| C  | 7.0290616  | 4.1585360 | -0.5094906 |
| N  | 7.6776898  | 3.8262191 | -1.4317032 |
| C  | 4.4972067  | 4.1944879 | -0.0351612 |
| O  | 3.5966427  | 3.8195152 | -0.6523539 |
| S  | 6.6471161  | 1.9993768 | 5.4581506  |
| C  | 9.2256019  | 3.0876972 | 8.4603026  |
| C  | 10.5935564 | 2.4216368 | 8.3110754  |
| H  | 9.1996328  | 4.3184596 | 0.7018329  |
| H  | 9.9923444  | 4.4754183 | 2.2976499  |
| H  | 9.0433134  | 2.4283990 | 3.1329350  |
| H  | 9.7800276  | 2.0857127 | 1.5729614  |
| H  | 7.5998206  | 0.9109365 | 1.9472477  |
| H  | 7.5882839  | 1.9112972 | 0.4638345  |
| H  | 7.2310475  | 0.5259435 | 7.5207844  |
| H  | 8.3028205  | 0.7215523 | 8.9168234  |
| H  | 5.9034126  | 0.7290867 | 9.6394351  |
| H  | 6.6297296  | 2.3168338 | 9.9775913  |
| H  | 5.5567927  | 2.1070148 | 8.5659688  |
| H  | 9.2574205  | 4.1330722 | 8.1256611  |
| H  | 8.8947775  | 3.0842804 | 9.5078797  |
| H  | 11.3247624 | 2.9613172 | 8.9284917  |
| H  | 10.5724870 | 1.3761140 | 8.6479243  |
| H  | 10.9350097 | 2.4487261 | 7.2675005  |
| H  | 5.4503869  | 4.6969117 | 4.2301200  |
| H  | 5.8982922  | 4.7360601 | 4.888101   |

Model <sup>dispc</sup>:

|    |           |           |            |
|----|-----------|-----------|------------|
| C  | 3.9128065 | 4.2936312 | 3.5428342  |
| C  | 4.4138648 | 4.4337182 | 4.8792266  |
| C  | 5.6767223 | 5.1203207 | 4.8200311  |
| C  | 5.9774205 | 5.4313761 | 3.4493611  |
| C  | 4.8911519 | 4.8837123 | 2.6634726  |
| Fe | 4.1943730 | 6.2521146 | 4.0033411  |
| C  | 2.4015810 | 7.1827824 | 3.6942661  |
| C  | 3.4316928 | 7.7987842 | 2.9069837  |
| C  | 4.4512621 | 8.2648973 | 3.8030710  |
| C  | 4.0434536 | 7.9388467 | 5.1416916  |
| C  | 2.7748591 | 7.2624276 | 5.0820697  |
| C  | 1.9780434 | 6.7583064 | 6.2455311  |
| C  | 7.1833384 | 6.1188709 | 2.8996975  |
| N  | 4.8079692 | 4.9591540 | 1.3036082  |
| C  | 5.0350649 | 4.6068716 | 0.1790977  |
| Fe | 5.1093522 | 4.8207696 | -1.7177148 |
| C  | 5.2729421 | 4.9591280 | -3.6290352 |
| N  | 5.3957732 | 5.0093417 | -4.7948825 |
| C  | 3.4013941 | 5.2927396 | -1.8109731 |
| O  | 2.2894215 | 5.6036299 | -1.8642525 |
| C  | 5.7449509 | 6.4661159 | -1.5452595 |
| O  | 6.1624247 | 7.5371860 | -1.4204194 |
| S  | 7.3250575 | 3.9276670 | -1.5317599 |
| Ni | 5.9899773 | 2.7048685 | -0.2190338 |
| S  | 7.3544560 | 2.7235685 | 1.5807935  |
| C  | 6.1128031 | 1.7959111 | 2.3652757  |
| N  | 6.1430476 | 1.4141567 | 3.6451999  |
| C  | 5.1903138 | 0.4322556 | 4.1857238  |
| C  | 4.0052333 | 1.0881003 | 4.8914601  |

|   |           |            |            |
|---|-----------|------------|------------|
| S | 4.5116676 | 2.5102736  | -1.8780998 |
| C | 5.3751200 | 1.8484153  | -3.3748114 |
| C | 6.8821317 | 1.6788305  | -3.2149189 |
| C | 7.6451500 | 2.9934290  | -3.0959931 |
| S | 4.8365273 | 1.4243183  | 1.2465981  |
| C | 7.1711767 | 1.9173493  | 4.5688492  |
| C | 8.4128813 | 1.0251028  | 4.5861151  |
| H | 6.2880049 | 5.4095059  | 5.6716659  |
| H | 3.9037927 | 4.1101167  | 5.7824517  |
| H | 5.3855959 | 8.7387283  | 3.5142390  |
| H | 4.6129671 | 8.1272498  | 6.0485434  |
| H | 7.4003297 | 3.6648086  | -3.9310066 |
| H | 8.7280402 | 2.8020330  | -3.0804590 |
| H | 7.0962206 | 1.0420445  | -2.3399427 |
| H | 7.2563793 | 1.1545792  | -4.1125994 |
| H | 4.9015765 | 0.8715458  | -3.5510638 |
| H | 5.1448798 | 2.5261987  | -4.2089947 |
| H | 4.8463566 | -0.2007751 | 3.3554349  |
| H | 5.7596327 | -0.2053518 | 4.8805782  |
| H | 3.3502625 | 0.3137753  | 5.3185939  |
| H | 4.3484468 | 1.7470147  | 5.7020712  |
| H | 3.4314387 | 1.6921800  | 4.1769347  |
| H | 7.4174208 | 2.9457850  | 4.2684382  |
| H | 6.7001862 | 1.9690367  | 5.5622565  |
| H | 9.1481596 | 1.4129096  | 5.3071850  |
| H | 8.1520854 | -0.0037187 | 4.8783182  |
| H | 8.8750738 | 1.0035745  | 3.5892137  |
| H | 6.9300007 | 6.6658786  | 1.9798660  |
| H | 7.5922988 | 6.8310816  | 3.6309475  |
| H | 7.9635865 | 5.3824489  | 2.6448098  |
| H | 1.5076246 | 6.6982386  | 3.3092625  |
| H | 3.4624718 | 7.8487223  | 1.8217597  |
| H | 2.6368305 | 6.4868031  | 7.0834866  |
| H | 1.2744076 | 7.5295833  | 6.6036087  |
| H | 1.3902516 | 5.8722300  | 5.9633874  |
| H | 2.9853573 | 3.8301550  | 3.2227862  |

Model <sup>disp</sup>c<sup>+</sup>:

|    |           |           |            |
|----|-----------|-----------|------------|
| C  | 3.6418993 | 4.5048768 | 3.6069999  |
| C  | 4.0158282 | 4.6583825 | 4.9827232  |
| C  | 5.3385589 | 5.2172706 | 5.0298902  |
| C  | 5.8154328 | 5.4194090 | 3.6929777  |
| C  | 4.7706875 | 4.9427511 | 2.8196109  |
| Fe | 4.0377510 | 6.4616340 | 4.0317257  |
| C  | 2.4713795 | 7.5918024 | 3.3527097  |
| C  | 3.7149518 | 8.1614118 | 2.9126159  |
| C  | 4.4819542 | 8.4904375 | 4.0743326  |
| C  | 3.7131876 | 8.1302985 | 5.2262889  |
| C  | 2.4617995 | 7.5768407 | 4.7927727  |
| C  | 1.3480405 | 7.0977305 | 5.6683671  |
| C  | 7.1306201 | 5.9695255 | 3.2521884  |
| N  | 4.8195906 | 4.9843433 | 1.4606898  |
| C  | 5.0545849 | 4.6486589 | 0.3381242  |
| Fe | 5.1115995 | 4.7516947 | -1.5551974 |
| C  | 5.1426098 | 4.9245631 | -3.4657891 |
| N  | 5.1839676 | 4.9843129 | -4.6355675 |
| C  | 3.3788802 | 5.2224990 | -1.6019840 |
| O  | 2.2686936 | 5.5186986 | -1.6311052 |
| C  | 5.7868379 | 6.4135785 | -1.4683735 |
| O  | 6.2231667 | 7.4757255 | -1.4115323 |
| S  | 7.3189014 | 3.9004719 | -1.5599603 |
| Ni | 6.0082197 | 2.7482344 | -0.1678813 |
| S  | 7.5247359 | 2.6763239 | 1.4980272  |
| C  | 6.3465902 | 1.7180638 | 2.3561803  |
| N  | 6.5140374 | 1.2205155 | 3.5741962  |
| C  | 5.4902807 | 0.3703595 | 4.2129788  |
| C  | 4.5279592 | 1.2044397 | 5.0573220  |
| S  | 4.4458129 | 2.4885050 | -1.7364538 |
| C  | 5.2325458 | 1.8097595 | -3.2639410 |
| C  | 6.7439902 | 1.6314508 | -3.1839772 |
| C  | 7.5257511 | 2.9390516 | -3.1249888 |

|   |           |            |            |
|---|-----------|------------|------------|
| S | 4.9369259 | 1.4756994  | 1.3608314  |
| C | 7.7444612 | 1.4648839  | 4.3528857  |
| C | 8.7758690 | 0.3604005  | 4.1254393  |
| H | 5.8838009 | 5.4936399  | 5.9287892  |
| H | 3.3902624 | 4.4193358  | 5.8380077  |
| H | 5.4902194 | 8.8963858  | 4.0801106  |
| H | 4.0370285 | 8.2136896  | 6.2608198  |
| H | 7.2402677 | 3.6103083  | -3.9478335 |
| H | 8.6061628 | 2.7412307  | -3.1705634 |
| H | 7.0056436 | 0.9939688  | -2.3237490 |
| H | 7.0606328 | 1.1003269  | -4.0980798 |
| H | 4.7381826 | 0.8375657  | -3.4033130 |
| H | 4.9545346 | 2.4837214  | -4.0875551 |
| H | 4.9544034 | -0.1782891 | 3.4254070  |
| H | 6.0318263 | -0.3647471 | 4.8260402  |
| H | 3.7919058 | 0.5483168  | 5.5439057  |
| H | 5.0713158 | 1.7577018  | 5.8375655  |
| H | 3.9990869 | 1.9274060  | 4.4214867  |
| H | 8.1453727 | 2.4471963  | 4.0648367  |
| H | 7.4396052 | 1.5207135  | 5.4083186  |
| H | 9.6665951 | 0.5485840  | 4.7419872  |
| H | 8.3668921 | -0.6221715 | 4.4030816  |
| H | 9.0786475 | 0.3337252  | 3.0694834  |
| H | 7.0189029 | 6.5661202  | 2.3354111  |
| H | 7.5743502 | 6.5991871  | 4.0350854  |
| H | 7.8266121 | 5.1449395  | 3.0228348  |
| H | 1.6722949 | 7.2234145  | 2.7145060  |
| H | 4.0341610 | 8.2840116  | 1.8807679  |
| H | 1.7286667 | 6.7389865  | 6.6351457  |
| H | 0.6458458 | 7.9235173  | 5.8701669  |
| H | 0.7824210 | 6.2887484  | 5.1848528  |
| H | 2.7113416 | 4.1132147  | 3.2082742  |

Model  $\text{disp}^{\text{c}^+}\text{-H}_2$ :

|    |            |            |            |
|----|------------|------------|------------|
| C  | 3.3804372  | 9.6035371  | 3.5580397  |
| C  | 4.0107495  | 9.2366309  | 4.7891853  |
| C  | 3.0054144  | 9.1782201  | 5.8141180  |
| C  | 1.7305066  | 9.5106676  | 5.2423509  |
| C  | 1.9831555  | 9.7910188  | 3.8468681  |
| Fe | 2.5664826  | 7.8606353  | 4.3104512  |
| C  | 3.1578925  | 6.2628670  | 3.1123592  |
| C  | 1.7570244  | 6.5113215  | 2.9688637  |
| C  | 1.1495631  | 6.3851258  | 4.2629768  |
| C  | 2.1881904  | 6.0569950  | 5.1997593  |
| C  | 3.4374501  | 5.9780040  | 4.4900941  |
| C  | 4.7722148  | 5.6490236  | 5.0791045  |
| C  | 0.4080427  | 9.6141418  | 5.9282228  |
| N  | 1.0131707  | 10.1302269 | 2.9486628  |
| C  | 0.0766114  | 10.4113399 | 2.2818981  |
| Fe | -1.4314375 | 10.5499364 | 1.2104217  |
| C  | -3.0074405 | 10.4858502 | 0.1117500  |
| N  | -3.9706351 | 10.4254360 | -0.5533016 |
| C  | -0.6493393 | 9.5925310  | -0.0935810 |
| O  | -0.1470926 | 8.9932406  | -0.9373461 |
| C  | -2.1894034 | 9.1766802  | 2.0810299  |
| O  | -2.6873869 | 8.3087930  | 2.6506438  |
| S  | -2.3851708 | 12.1421644 | 2.6749168  |
| Ni | -0.7750286 | 13.6680106 | 2.2304850  |
| S  | -1.2902293 | 15.1340994 | 3.8955286  |
| C  | -0.3809512 | 16.2996795 | 2.9663904  |
| N  | -0.2475941 | 17.5814354 | 3.2824702  |
| C  | 0.5131806  | 18.5198236 | 2.4312744  |
| C  | 1.9743624  | 18.6081353 | 2.8706885  |
| S  | -0.7335841 | 12.5911895 | 0.2464212  |
| C  | -2.2841932 | 13.3541509 | -0.4520812 |
| C  | -3.2654236 | 13.9011672 | 0.5895503  |
| C  | -3.7449841 | 12.9507158 | 1.6908870  |
| S  | 0.3029057  | 15.5513363 | 1.5461663  |
| C  | -0.8644227 | 18.1548156 | 4.4960823  |

|   |            |            |            |
|---|------------|------------|------------|
| C | -2.2503405 | 18.7257025 | 4.1966545  |
| H | 3.1668591  | 8.9034665  | 6.8530965  |
| H | 5.0648923  | 9.0063190  | 4.9148318  |
| H | 0.0980809  | 6.5301409  | 4.4956081  |
| H | 2.0655405  | 5.9135969  | 6.2704296  |
| H | -4.3660796 | 12.1390455 | 1.2935892  |
| H | -4.3144902 | 13.5234567 | 2.4364355  |
| H | -2.8214063 | 14.7949244 | 1.0604010  |
| H | -4.1616694 | 14.2416025 | 0.0426136  |
| H | -1.9180832 | 14.1859532 | -1.0703013 |
| H | -2.7448371 | 12.5923245 | -1.0917270 |
| H | 0.4314423  | 18.1852519 | 1.3875140  |
| H | 0.0086131  | 19.4935142 | 2.5136998  |
| H | 2.5062499  | 19.3410300 | 2.2470956  |
| H | 2.0508044  | 18.9286226 | 3.9202806  |
| H | 2.4651661  | 17.6310813 | 2.7597597  |
| H | -0.9154403 | 17.3690636 | 5.2631773  |
| H | -0.1771485 | 18.9348559 | 4.8557574  |
| H | -2.6699138 | 19.1821694 | 5.1044547  |
| H | -2.1967978 | 19.4993788 | 3.4159139  |
| H | -2.9263645 | 17.9270602 | 3.8604115  |
| H | 0.8451264  | 12.9318959 | 2.7195744  |
| H | 0.4187242  | 12.8638385 | 3.3725436  |
| H | -0.4148950 | 9.4088466  | 5.2290408  |
| H | 0.3457918  | 8.9030452  | 6.7629432  |
| H | 0.2619049  | 10.6282853 | 6.3361078  |
| H | 3.9021382  | 6.3298633  | 2.3226728  |
| H | 1.2510398  | 6.7919465  | 2.0488445  |
| H | 4.8433184  | 5.9949974  | 6.1200418  |
| H | 4.9257775  | 4.5570649  | 5.0776962  |
| H | 5.5865751  | 6.1024073  | 4.4965960  |
| H | 3.8453522  | 9.7129580  | 2.5828952  |

Model  $\text{disp}_{\text{C}_{\text{TS}}^+ - \text{H}_2}$ :

|    |            |            |            |
|----|------------|------------|------------|
| C  | 1.6764955  | 6.6104085  | 3.1283635  |
| C  | 1.8112716  | 6.3496279  | 4.5322362  |
| C  | 3.2064999  | 6.1957675  | 4.8173176  |
| C  | 3.9476478  | 6.3550221  | 3.6008607  |
| C  | 2.9952319  | 6.6194907  | 2.5573083  |
| Fe | 2.8126382  | 8.0710029  | 4.0005019  |
| C  | 4.1106837  | 9.5981020  | 4.4841059  |
| C  | 3.0791436  | 9.5194424  | 5.4765521  |
| C  | 1.8053653  | 9.6971829  | 4.8528871  |
| C  | 2.0725703  | 9.8945190  | 3.4449902  |
| C  | 3.4973567  | 9.8222899  | 3.2097705  |
| H  | 3.2280685  | 9.3071041  | 6.5323104  |
| C  | 0.4557689  | 9.7142157  | 5.4922076  |
| N  | 1.1134132  | 10.1292452 | 2.5035616  |
| C  | 0.2175974  | 10.4028857 | 1.7811720  |
| Fe | -1.1319305 | 10.6001408 | 0.5271347  |
| C  | 0.0074978  | 10.2424115 | -0.8157891 |
| O  | 0.7347214  | 10.0308261 | -1.6814787 |
| H  | 5.1752772  | 9.4714390  | 4.6602832  |
| H  | 1.0022279  | 6.3102400  | 5.2567954  |
| H  | 3.6441786  | 6.0361185  | 5.7997279  |
| C  | 5.4318662  | 6.2644743  | 3.4444510  |
| C  | -1.6852619 | 8.9160243  | 0.8051211  |
| O  | -2.0488862 | 7.8407099  | 0.9983840  |
| S  | -2.6160927 | 11.4652159 | 2.1552401  |
| C  | -3.9463862 | 12.3412841 | 1.1854947  |
| C  | -3.5082917 | 13.6584888 | 0.5366360  |
| C  | -2.2939696 | 13.6299122 | -0.3966137 |
| S  | -0.7388919 | 12.9281046 | 0.3549342  |
| Ni | -1.3092414 | 13.2608008 | 2.5046461  |
| S  | -0.4354463 | 15.3363250 | 2.7263989  |
| C  | -1.4158539 | 15.4471527 | 4.1690424  |
| N  | -1.5600420 | 16.5452249 | 4.9002878  |



|   |            |            |            |
|---|------------|------------|------------|
| C | -2.4381800 | 16.5827276 | 6.0879185  |
| C | -3.8441708 | 17.0577932 | 5.7211018  |
| C | -2.4835942 | 10.6495741 | -0.8395014 |
| N | -3.3008419 | 10.6653500 | -1.6794132 |
| S | -2.2153994 | 13.9275918 | 4.4809409  |
| C | -0.8823397 | 17.8120213 | 4.5549557  |
| C | 0.4539702  | 17.9460629 | 5.2837670  |
| H | -4.3201544 | 11.6227102 | 0.4469794  |
| H | -4.7271857 | 12.5504477 | 1.9298418  |
| H | -3.3290875 | 14.4050579 | 1.3297408  |
| H | -4.3641282 | 14.0254372 | -0.0564062 |
| H | -2.0214280 | 14.6609150 | -0.6629934 |
| H | -2.4882128 | 13.0520021 | -1.3079901 |
| H | -0.7459160 | 17.8461509 | 3.4650169  |
| H | -1.5738572 | 18.6207228 | 4.8332123  |
| H | 0.9138086  | 18.9151985 | 5.0416739  |
| H | 0.3144994  | 17.8942036 | 6.3736993  |
| H | 1.1397545  | 17.1452514 | 4.9733957  |
| H | -2.4625317 | 15.5785776 | 6.5337060  |
| H | -1.9595673 | 17.2620043 | 6.8085999  |
| H | -4.4657088 | 17.1159647 | 6.6261482  |
| H | -3.8145547 | 18.0557312 | 5.2591810  |
| H | -4.3119063 | 16.3539511 | 5.0183649  |
| H | 0.6369848  | 12.6811244 | 3.4416858  |
| H | 0.1906651  | 12.2620732 | 3.8920275  |
| H | -0.3172728 | 9.3749366  | 4.7882062  |
| H | 0.4351390  | 9.0687738  | 6.3805038  |
| H | 0.1952742  | 10.7370982 | 5.8118748  |
| H | 3.2430453  | 6.8121173  | 1.5165016  |
| H | 0.7462755  | 6.7929744  | 2.5964699  |
| H | 5.9480157  | 6.5456067  | 4.3732606  |
| H | 5.7206476  | 5.2283655  | 3.2010840  |
| H | 5.7862101  | 6.9101050  | 2.6286601  |
| H | 3.9879433  | 9.9347705  | 2.2477904  |

Model<sup>disp</sup>c<sup>\*</sup>:

|    |           |             |            |
|----|-----------|-------------|------------|
| O  | 7.1103612 | -5.0667039  | -1.4204885 |
| C  | 4.9002720 | -0.8820079  | -0.2063596 |
| Fe | 5.5787115 | -2.6258633  | -0.6728783 |
| C  | 6.7396150 | -1.7349269  | -1.7794814 |
| N  | 7.4616562 | -1.1137326  | -2.4774528 |
| C  | 6.2807472 | -4.2802700  | -1.1840061 |
| Ni | 4.1441821 | -4.7842014  | -1.3885654 |
| S  | 4.2620418 | -6.0750467  | -3.2363162 |
| C  | 4.3383221 | -7.4141000  | -2.1326584 |
| N  | 4.4622464 | -8.6986703  | -2.4930824 |
| C  | 4.5406441 | -9.7674990  | -1.4812283 |
| C  | 5.9784217 | -10.0905651 | -1.0693122 |
| N  | 4.5117673 | 0.1941156   | 0.0596577  |
| S  | 4.2203783 | -6.8550602  | -0.4932603 |
| S  | 3.8659152 | -3.7281929  | 0.5566673  |
| C  | 2.3591284 | -2.6471765  | 0.5007896  |
| C  | 1.6515097 | -2.5856410  | -0.8477334 |
| C  | 2.4629422 | -1.9231784  | -1.9546222 |
| S  | 3.9988487 | -2.8308307  | -2.4651645 |
| C  | 4.5298774 | -9.0895018  | -3.9117526 |
| C  | 3.1618008 | -9.4505837  | -4.4941214 |
| C  | 6.6137144 | -2.5671476  | 0.7606184  |
| O  | 7.2810772 | -2.5189526  | 1.7047924  |
| H  | 2.7766201 | -0.9111050  | -1.6636608 |
| H  | 1.8709428 | -1.8648441  | -2.8788299 |
| H  | 1.3468121 | -3.5980312  | -1.1591370 |
| H  | 0.7262371 | -1.9965861  | -0.7128981 |
| H  | 1.6950864 | -3.0824988  | 1.2607479  |
| H  | 2.6746371 | -1.6475311  | 0.8296307  |
| H  | 3.9524687 | -9.4463821  | -0.6096781 |

|    |            |             |            |
|----|------------|-------------|------------|
| H  | 4.0425758  | -10.6517947 | -1.9052591 |
| H  | 5.9795301  | -10.8993112 | -0.3245324 |
| H  | 6.5809839  | -10.4209204 | -1.9274626 |
| H  | 6.4593782  | -9.2106311  | -0.6227220 |
| H  | 4.9770093  | -8.2520942  | -4.4657645 |
| H  | 5.2253954  | -9.9390671  | -3.9812473 |
| H  | 3.2709555  | -9.7515568  | -5.5458515 |
| H  | 2.6985905  | -10.2863368 | -3.9506345 |
| H  | 2.4839016  | -8.5879595  | -4.4519902 |
| C  | 8.1782737  | -0.3093420  | -3.3236132 |
| C  | 7.6821151  | 0.8982487   | -3.9408512 |
| C  | 8.7110411  | 1.3705874   | -4.8158881 |
| C  | 9.8308911  | 0.4776372   | -4.7231053 |
| C  | 9.5259723  | -0.5697798  | -3.7893749 |
| Fe | 9.3914035  | 1.2792401   | -2.8799574 |
| C  | 10.3593637 | -1.7676199  | -3.4578151 |
| H  | 11.4301999 | -1.5313063  | -3.5190292 |
| H  | 10.1469042 | -2.1390819  | -2.4459190 |
| H  | 10.1564400 | -2.5919243  | -4.1618776 |
| C  | 10.7196111 | 1.3099096   | -1.3059149 |
| C  | 9.3919230  | 1.5754073   | -0.8189897 |
| C  | 8.9180565  | 2.7444327   | -1.5088558 |
| C  | 9.9444298  | 3.1997217   | -2.4013317 |
| C  | 11.0625543 | 2.3094522   | -2.2763066 |
| C  | 8.6620172  | 0.8187751   | 0.2466929  |
| H  | 8.9782662  | -0.2327683  | 0.2811328  |
| H  | 8.8712865  | 1.2559402   | 1.2370282  |
| H  | 7.5738736  | 0.8479853   | 0.0980625  |
| H  | 6.7034710  | 1.3361199   | -3.7680207 |
| H  | 8.6601603  | 2.2682082   | -5.4256023 |
| H  | 10.7733306 | 0.5832949   | -5.2551814 |
| H  | 11.3501551 | 0.4805344   | -0.9935700 |
| H  | 11.9941573 | 2.3706639   | -2.8326209 |
| H  | 9.8775105  | 4.0522850   | -3.0719510 |
| H  | 7.9344737  | 3.1903204   | -1.3834195 |

Model<sup>disp</sup>[e<sup>+</sup>]:

|    |           |             |            |
|----|-----------|-------------|------------|
| O  | 7.2635150 | -5.5065831  | -1.7371582 |
| C  | 5.6376533 | -1.0284868  | -0.6723630 |
| Fe | 6.0538556 | -2.8752629  | -1.0054025 |
| C  | 7.2292848 | -2.0958394  | -2.1602444 |
| N  | 7.9403988 | -1.4407790  | -2.8438112 |
| C  | 6.5679130 | -4.6174954  | -1.4717062 |
| Ni | 4.3409481 | -4.8040447  | -1.4520729 |
| S  | 4.1354455 | -6.2279036  | -3.1691170 |
| C  | 4.1856476 | -7.4904057  | -1.9638451 |
| N  | 4.1541666 | -8.7904549  | -2.2188683 |
| C  | 4.2139030 | -9.7945744  | -1.1366663 |
| C  | 5.6555164 | -10.2198555 | -0.8594329 |
| N  | 5.4501462 | 0.1241019   | -0.5570861 |
| S  | 4.2729839 | -6.7809504  | -0.3752296 |
| S  | 4.3240792 | -3.6001732  | 0.4290465  |
| C  | 2.9748017 | -2.3396621  | 0.3181588  |
| C  | 2.2089867 | -2.3355517  | -0.9986381 |
| C  | 3.0230291 | -1.8411695  | -2.1879468 |
| S  | 4.4000169 | -2.9584377  | -2.7124193 |
| C  | 4.0703148 | -9.3154910  | -3.5966801 |
| C  | 2.6207603 | -9.5825908  | -4.0013890 |
| C  | 7.1549384 | -2.9080288  | 0.4095131  |
| O  | 7.8494241 | -2.9242537  | 1.3273523  |
| H  | 3.4682672 | -0.8580514  | -1.9768218 |
| H  | 2.3862934 | -1.7685876  | -3.0814376 |
| H  | 1.8071408 | -3.3408702  | -1.2064566 |
| H  | 1.3487828 | -1.6541510  | -0.8795563 |
| H  | 2.3043402 | -2.6004410  | 1.1493004  |
| H  | 3.4313478 | -1.3589450  | 0.5143524  |
| H  | 3.7451123 | -9.3663448  | -0.2394142 |

|    |            |             |            |
|----|------------|-------------|------------|
| H  | 3.5975771  | -10.6445789 | -1.4643930 |
| H  | 5.6723415  | -10.9879457 | -0.0728602 |
| H  | 6.1213530  | -10.6407785 | -1.7625947 |
| H  | 6.2484807  | -9.3579569  | -0.5221391 |
| H  | 4.5458835  | -8.5906062  | -4.2725466 |
| H  | 4.6697178  | -10.2371657 | -3.6154883 |
| H  | 2.5904888  | -10.0114408 | -5.0133205 |
| H  | 2.1442445  | -10.2953341 | -3.3117540 |
| H  | 2.0447738  | -8.6468015  | -3.9980481 |
| C  | 8.3494055  | -0.3731842  | -3.5973613 |
| C  | 7.4964980  | 0.7213427   | -3.9840991 |
| C  | 8.3141061  | 1.6415549   | -4.7144635 |
| C  | 9.6569886  | 1.1293032   | -4.7386532 |
| C  | 9.6952848  | -0.1233396  | -4.0389731 |
| Fe | 9.0237712  | 1.4324584   | -2.8032411 |
| C  | 10.8679450 | -1.0248582  | -3.8316878 |
| H  | 11.8033284 | -0.4497193  | -3.8025362 |
| H  | 10.7670361 | -1.5913046  | -2.8947843 |
| H  | 10.9422843 | -1.7507823  | -4.6586237 |
| C  | 10.4317588 | 1.7540029   | -1.2943659 |
| C  | 9.2219637  | 1.2483859   | -0.7201631 |
| C  | 8.1616078  | 2.1515650   | -1.0788822 |
| C  | 8.7278984  | 3.2215935   | -1.8529096 |
| C  | 10.1355507 | 2.9699827   | -1.9890272 |
| C  | 9.0620883  | -0.0102898  | 0.0657347  |
| H  | 9.7950653  | -0.7713970  | -0.2377214 |
| H  | 9.2112285  | 0.1935776   | 1.1390336  |
| H  | 8.0448744  | -0.4028315  | -0.0565625 |
| H  | 6.4427335  | 0.8085899   | -3.7371353 |
| H  | 7.9789100  | 2.5795264   | -5.1476399 |
| H  | 10.5173942 | 1.6120693   | -5.1939707 |
| H  | 11.4009123 | 1.2631267   | -1.2497382 |
| H  | 10.8434888 | 3.5747708   | -2.5489297 |
| H  | 8.1842480  | 4.0571163   | -2.2851773 |
| H  | 7.1129418  | 1.9971864   | -0.8304644 |

Model <sup>disp</sup>[e<sup>+</sup>]-H<sub>2</sub>:

|    |            |            |            |
|----|------------|------------|------------|
| C  | 0.0201046  | 7.4478048  | 0.1014665  |
| C  | 0.7995652  | 6.4798099  | 0.8121158  |
| C  | -0.0731996 | 5.4534288  | 1.3015364  |
| C  | -1.4045945 | 5.7873853  | 0.8740741  |
| C  | -1.3508487 | 7.0212603  | 0.1393866  |
| Fe | -0.2070798 | 5.5998737  | -0.7830326 |
| C  | 1.2188723  | 4.7371642  | -2.0591453 |
| C  | 0.2758358  | 3.7575054  | -1.5846388 |
| C  | -1.0633837 | 4.1530497  | -1.9467589 |
| C  | -0.9430644 | 5.3784609  | -2.6798940 |
| C  | 0.4481065  | 5.7340309  | -2.7392061 |
| N  | 0.5934521  | 2.6459641  | -0.8559623 |
| C  | 0.6327321  | 1.6727641  | -0.1900464 |
| Fe | 0.5570454  | 0.1761226  | 0.8698457  |
| C  | 1.1677726  | 0.9213303  | 2.3840851  |
| O  | 1.5358438  | 1.3825220  | 3.3725332  |
| C  | 2.7007734  | 4.6820321  | -1.8825117 |
| C  | 0.3222335  | 4.2392825  | 2.0743475  |
| C  | -1.1354525 | 0.9688817  | 1.3326218  |
| N  | -2.1266753 | 1.5492047  | 1.5703737  |
| C  | 2.2263594  | -0.3254768 | 0.3757091  |
| O  | 3.3251911  | -0.5027971 | 0.0718108  |
| Ni | 0.2729523  | -3.0465019 | 0.0711080  |
| S  | -0.4348133 | -1.1111244 | -0.8611816 |
| C  | -2.2295968 | -1.2675120 | -0.3816255 |
| C  | -2.5040086 | -2.1890758 | 0.8104114  |

|   |            |            |            |
|---|------------|------------|------------|
| C | -1.7693060 | -1.8901922 | 2.1187277  |
| S | 0.0893068  | -1.8502101 | 1.9795883  |
| S | -0.1404859 | -4.4040769 | -1.7035354 |
| C | 0.0643696  | -5.7223559 | -0.5783118 |
| S | 0.3924963  | -5.1099859 | 1.0214540  |
| N | -0.0189146 | -7.0086428 | -0.8947045 |
| C | -0.2924227 | -7.4566216 | -2.2748290 |
| C | -1.7887964 | -7.6673115 | -2.5044090 |
| C | 0.1601050  | -8.0725922 | 0.1143030  |
| C | 1.6160728  | -8.5334911 | 0.1818875  |
| H | -2.5997521 | -0.2503973 | -0.2065498 |
| H | -2.7100979 | -1.6875000 | -1.2766627 |
| H | -2.2896461 | -3.2299653 | 0.5121920  |
| H | -3.5860699 | -2.1349249 | 1.0224070  |
| H | -1.9695436 | -2.6985113 | 2.8362686  |
| H | -2.0746131 | -0.9306951 | 2.5531856  |
| H | -0.1810742 | -7.6900434 | 1.0864613  |
| H | -0.5093231 | -8.8952613 | -0.1776510 |
| H | 1.7147838  | -9.3500005 | 0.9116164  |
| H | 1.9575776  | -8.9031069 | -0.7964256 |
| H | 2.2641088  | -7.7027552 | 0.4947986  |
| H | 0.1148571  | -6.7077272 | -2.9686534 |
| H | 0.2711157  | -8.3903964 | -2.4167351 |
| H | -1.9608687 | -8.0354241 | -3.5260703 |
| H | -2.1947134 | -8.4077585 | -1.7989670 |
| H | -2.3306852 | -6.7199356 | -2.3765512 |
| H | 3.1299767  | 5.6928826  | -1.8597944 |
| H | 2.9667075  | 4.1610445  | -0.9515667 |
| H | 3.1652127  | 4.1348389  | -2.7199105 |
| H | 1.3349277  | 3.9091989  | 1.8016473  |
| H | 0.3247489  | 4.4629783  | 3.1540684  |
| H | -0.3873657 | 3.4180456  | 1.9042612  |
| H | -1.9689842 | 3.6081068  | -1.6976883 |
| H | -1.7669808 | 5.9490288  | -3.0987900 |
| H | 0.8597952  | 6.6283743  | -3.1990333 |
| H | 1.8812520  | 6.4875548  | 0.9234906  |
| H | 0.4024776  | 8.3298230  | -0.4052343 |
| H | -2.1911621 | 7.5290072  | -0.3254964 |
| H | -2.2868432 | 5.1798775  | 1.0588180  |
| H | 2.1677573  | -3.0476083 | 0.1396101  |
| H | 2.0335611  | -2.8538163 | -0.6014111 |

Model <sup>disp</sup>d:

|    |            |           |           |
|----|------------|-----------|-----------|
| C  | 3.4153435  | 4.2267793 | 4.1576071 |
| C  | 3.6849988  | 4.7999734 | 5.4597394 |
| C  | 5.0510065  | 5.2611583 | 5.5068075 |
| C  | 5.6468716  | 4.9307621 | 4.2448253 |
| C  | 4.6503044  | 4.2942321 | 3.4261035 |
| Fe | 4.0513956  | 6.1586159 | 3.9848183 |
| C  | 3.8209524  | 7.2447984 | 2.2718249 |
| C  | 4.7686160  | 7.8852291 | 3.1450610 |
| C  | 4.0859527  | 8.1631840 | 4.3815198 |
| C  | 2.7341209  | 7.6941715 | 4.2729819 |
| C  | 2.5696743  | 7.1219594 | 2.9670953 |
| C  | 6.1904571  | 8.2249865 | 2.8194407 |
| N  | 2.7646415  | 4.9149826 | 6.4595749 |
| C  | 2.1180679  | 4.5524364 | 7.4018089 |
| Fe | 0.7060179  | 4.6545329 | 8.6843763 |
| C  | -0.4614588 | 5.0937491 | 7.4240310 |
| O  | -1.2127510 | 5.3808931 | 6.5933362 |
| C  | 2.1146047  | 3.6366123 | 3.7227169 |
| Ni | 2.5634442  | 2.6686469 | 8.3899346 |
| S  | 3.1069037  | 1.5258656 | 6.5237002 |
| C  | 4.7467377  | 1.9733997 | 6.8836822 |

|   |            |            |            |
|---|------------|------------|------------|
| N | 5.7981727  | 1.7063388  | 6.1037487  |
| C | 7.1816168  | 1.8819003  | 6.5733048  |
| C | 7.8061671  | 3.1907228  | 6.0962151  |
| S | 4.8193183  | 2.8101708  | 8.4050353  |
| S | 2.2700513  | 3.8076279  | 10.2873387 |
| C | 1.2573166  | 2.6899120  | 11.4510624 |
| N | 0.7964927  | 1.4577106  | 10.8944213 |
| C | -0.2005433 | 1.5560603  | 9.8770479  |
| S | 0.3588451  | 2.3251647  | 8.2237523  |
| C | 5.6256018  | 1.1573055  | 4.7501982  |
| C | 5.6153128  | -0.3714881 | 4.7468574  |
| C | -0.7041787 | 4.6463353  | 9.9938185  |
| N | -1.5515297 | 4.5998738  | 10.8042710 |
| C | 1.1280075  | 6.3193595  | 9.1292277  |
| O | 1.4050090  | 7.4048531  | 9.4136135  |
| H | 4.7832240  | 3.9630250  | 2.3988655  |
| H | 6.6666478  | 5.1602438  | 3.9487611  |
| H | 1.6697551  | 6.6436344  | 2.5894319  |
| H | 4.0364946  | 6.8795123  | 1.2705923  |
| H | -1.0352891 | 2.1750812  | 10.2298027 |
| H | -0.5429304 | 0.5537204  | 9.5907854  |
| H | 1.5727031  | 0.8565373  | 10.6086724 |
| H | 1.9470733  | 2.4898873  | 12.2806040 |
| H | 0.4030810  | 3.2936681  | 11.7830420 |
| H | 7.1774980  | 1.8297563  | 7.6712809  |
| H | 7.7507181  | 1.0158077  | 6.1985322  |
| H | 8.8547121  | 3.2453839  | 6.4255406  |
| H | 7.7774786  | 3.2607453  | 4.9992066  |
| H | 7.2529284  | 4.0442965  | 6.5084275  |
| H | 4.6926933  | 1.5680191  | 4.3382811  |
| H | 6.4543385  | 1.5542736  | 4.1442696  |
| H | 5.5178047  | -0.7472796 | 3.7171866  |
| H | 6.5486238  | -0.7705494 | 5.1726413  |
| H | 4.7680360  | -0.7445700 | 5.3392575  |
| H | 1.2743063  | 4.1620790  | 4.1990120  |
| H | 2.0016688  | 3.7071234  | 2.6312906  |
| H | 2.0527037  | 2.5759467  | 4.0198045  |
| H | 4.5371014  | 8.6145020  | 5.2616085  |
| H | 1.9854276  | 7.7143812  | 5.0610666  |
| H | 6.6088865  | 7.5100154  | 2.0954713  |
| H | 6.2620960  | 9.2338479  | 2.3776639  |
| H | 6.8143728  | 8.2086236  | 3.7251570  |
| H | 5.5156342  | 5.7516479  | 6.3561617  |

Model <sup>disp</sup>d<sup>+</sup>:

|    |           |            |           |
|----|-----------|------------|-----------|
| C  | 4.0743120 | 9.0777139  | 3.5166314 |
| C  | 3.4992872 | 8.8441070  | 4.8257969 |
| C  | 2.1973575 | 8.2327221  | 4.6781996 |
| C  | 1.9563969 | 8.1182435  | 3.2705007 |
| C  | 3.0962013 | 8.6332534  | 2.5713555 |
| Fe | 3.6370694 | 7.0661329  | 3.8326213 |
| C  | 4.3748357 | 5.4978134  | 2.6808333 |
| C  | 3.2753556 | 5.0385432  | 3.4784657 |
| C  | 3.6171089 | 5.2882432  | 4.8531776 |
| C  | 4.9223533 | 5.8863665  | 4.8975868 |
| C  | 5.3885980 | 6.0193540  | 3.5475641 |
| C  | 2.0150811 | 4.4073432  | 2.9778716 |
| N  | 4.1067301 | 9.1575037  | 6.0031771 |
| C  | 4.5287575 | 9.7480686  | 6.9464986 |
| Fe | 5.4909116 | 10.1164342 | 8.5448468 |
| C  | 6.9923368 | 9.4490823  | 7.8271528 |
| O  | 7.9558010 | 9.0228198  | 7.3654831 |
| C  | 5.4062679 | 9.6965687  | 3.2497803 |
| Ni | 3.9160436 | 11.8576649 | 7.3430121 |

|   |            |            |            |
|---|------------|------------|------------|
| S | 3.9465885  | 12.6124143 | 5.2221938  |
| C | 2.2357381  | 12.2637397 | 5.2089858  |
| N | 1.4275976  | 12.4655012 | 4.1773785  |
| C | -0.0193748 | 12.1816323 | 4.2528954  |
| C | -0.3326320 | 10.7798724 | 3.7329042  |
| S | 1.7455246  | 11.6454179 | 6.7635127  |
| S | 3.5986108  | 11.2149114 | 9.4586395  |
| C | 4.2902430  | 12.6277590 | 10.5604701 |
| N | 4.9324448  | 13.6902256 | 9.8725776  |
| C | 6.1709947  | 13.4132603 | 9.2388062  |
| S | 6.0871920  | 12.2497153 | 7.7112465  |
| C | 1.9182672  | 13.0170674 | 2.8979924  |
| C | 1.7877706  | 14.5392977 | 2.8637039  |
| C | 6.4817201  | 10.4341026 | 10.1565211 |
| N | 7.0721543  | 10.6765437 | 11.1395004 |
| C | 4.9108360  | 8.5825841  | 9.2772027  |
| O | 4.5355965  | 7.6020660  | 9.7456084  |
| H | 3.2337769  | 8.6329355  | 1.4929240  |
| H | 1.0746548  | 7.6771645  | 2.8139041  |
| H | 6.3275522  | 6.4687776  | 3.2354225  |
| H | 4.4043079  | 5.4925728  | 1.5940659  |
| H | 6.8583907  | 12.9157535 | 9.9350676  |
| H | 6.6087254  | 14.3316117 | 8.8301537  |
| H | 3.4005180  | 12.9931348 | 11.0867730 |
| H | 4.9893195  | 12.1354872 | 11.2485051 |
| H | -0.3430018 | 12.3003772 | 5.2966862  |
| H | -0.5222595 | 12.9555495 | 3.6549906  |
| H | -1.4162942 | 10.5990691 | 3.7743891  |
| H | -0.0011393 | 10.6648394 | 2.6898878  |
| H | 0.1800443  | 10.0272717 | 4.3471445  |
| H | 2.9637091  | 12.7048108 | 2.7654093  |
| H | 1.3209427  | 12.5435453 | 2.1049056  |
| H | 2.1226726  | 14.9204677 | 1.8884134  |
| H | 0.7423203  | 14.8473441 | 3.0127034  |
| H | 2.4071792  | 14.9930384 | 3.6498843  |
| H | 6.1314811  | 9.4159729  | 4.0267932  |
| H | 5.7943853  | 9.3819353  | 2.2716792  |
| H | 5.3227559  | 10.7955850 | 3.2591188  |
| H | 2.9802455  | 5.0741849  | 5.7075314  |
| H | 5.4472137  | 6.2117378  | 5.7918125  |
| H | 1.7712695  | 4.7554821  | 1.9643485  |
| H | 2.1341799  | 3.3118122  | 2.9369345  |
| H | 1.1688630  | 4.6264023  | 3.6441936  |
| H | 1.5400116  | 7.9428878  | 5.4920913  |
| H | 4.2993613  | 14.2571746 | 9.3084451  |

Model  $\text{d}^{\text{disp}}\text{d}^{\text{+}}\text{-H}_2$ :

|    |           |            |           |
|----|-----------|------------|-----------|
| C  | 3.1838815 | 5.3977790  | 3.2798315 |
| C  | 3.5555150 | 5.4739603  | 4.6675866 |
| C  | 4.8714523 | 6.0364958  | 4.7558098 |
| C  | 5.3249042 | 6.3167285  | 3.4249276 |
| C  | 4.2869726 | 5.9193588  | 2.5172909 |
| Fe | 3.5949626 | 7.3382489  | 3.8146498 |
| C  | 3.4923539 | 9.0460664  | 4.8954073 |
| C  | 2.1829991 | 8.4478266  | 4.7558403 |
| C  | 1.9105615 | 8.3839347  | 3.3511909 |
| C  | 3.0423304 | 8.9131860  | 2.6407969 |
| C  | 4.0528791 | 9.3100954  | 3.5816089 |
| C  | 5.3826509 | 9.9251925  | 3.2939366 |
| N  | 4.1198612 | 9.3088567  | 6.0765146 |
| C  | 4.6311234 | 9.6900064  | 7.0683942 |
| Ni | 3.8107382 | 12.2448456 | 7.4870608 |
| S  | 1.6842586 | 11.9145100 | 6.8746449 |
| C  | 2.2143442 | 12.2101881 | 5.2419843 |
| N  | 1.4420492 | 12.1656887 | 4.1650181 |

|    |            |            |            |
|----|------------|------------|------------|
| C  | 2.0061856  | 12.2952658 | 2.8076990  |
| C  | 2.0208373  | 13.7485391 | 2.3351764  |
| C  | 1.9041360  | 4.8485448  | 2.7309052  |
| Fe | 5.5812483  | 10.0648295 | 8.6663719  |
| S  | 3.6421483  | 11.1577731 | 9.5184953  |
| C  | 4.2686754  | 12.4421364 | 10.6841583 |
| N  | 4.9095330  | 13.5957458 | 9.9676638  |
| C  | 6.2256061  | 13.3313819 | 9.3007388  |
| S  | 6.0445697  | 12.2425830 | 7.8205616  |
| C  | 6.5412008  | 10.4648187 | 10.2725716 |
| N  | 7.0923859  | 10.8023106 | 11.2517349 |
| C  | 5.0691721  | 8.5155464  | 9.4040645  |
| O  | 4.7338969  | 7.5263100  | 9.8845224  |
| C  | 7.1010575  | 9.4140796  | 7.9837523  |
| O  | 8.0827869  | 9.0014807  | 7.5490981  |
| S  | 3.9115262  | 12.5895342 | 5.2515690  |
| C  | -0.0258903 | 12.0403392 | 4.2613029  |
| C  | -0.4969812 | 10.5996874 | 4.0902371  |
| H  | 3.1535012  | 8.9540427  | 1.5601516  |
| H  | 1.0174906  | 7.9587775  | 2.9022542  |
| H  | 6.2713629  | 6.7772858  | 3.1546847  |
| H  | 4.3061024  | 6.0262973  | 1.4357548  |
| H  | 6.9125449  | 12.8681561 | 10.0205745 |
| H  | 6.5966136  | 14.3004986 | 8.9440769  |
| H  | 5.0045354  | 14.3926475 | 10.6125249 |
| H  | 3.3970643  | 12.8497797 | 11.2119807 |
| H  | 4.9948848  | 12.0016538 | 11.3788970 |
| H  | -0.3408831 | 12.4477039 | 5.2326865  |
| H  | -0.4415433 | 12.6905769 | 3.4766811  |
| H  | -1.5955034 | 10.5633713 | 4.1258014  |
| H  | -0.1627901 | 10.1913263 | 3.1259903  |
| H  | -0.0904920 | 9.9674955  | 4.8905286  |
| H  | 3.0156683  | 11.8598744 | 2.8198350  |
| H  | 1.3855239  | 11.6636359 | 2.1556121  |
| H  | 2.4128286  | 13.8031839 | 1.3092693  |
| H  | 1.0058937  | 14.1732526 | 2.3368513  |
| H  | 2.6606307  | 14.3579609 | 2.9886384  |
| H  | 6.1092058  | 9.6719938  | 4.0794486  |
| H  | 5.7714911  | 9.5667495  | 2.3309404  |
| H  | 5.3083346  | 11.0251429 | 3.2536470  |
| H  | 2.9259723  | 5.1810574  | 5.5039338  |
| H  | 5.4118373  | 6.2562000  | 5.6730908  |
| H  | 1.6460742  | 5.3271980  | 1.7751199  |
| H  | 1.9983911  | 3.7649714  | 2.5488485  |
| H  | 1.0745917  | 4.9996778  | 3.4364975  |
| H  | 1.5445751  | 8.1287660  | 5.5738394  |
| H  | 3.5324759  | 13.7269138 | 7.9819834  |
| H  | 4.2160417  | 13.8377625 | 9.1259919  |

Model <sup>disp</sup>d<sup>+</sup>-2H:

|    |           |           |           |
|----|-----------|-----------|-----------|
| C  | 3.2465477 | 5.3205732 | 3.3569102 |
| C  | 3.6257434 | 5.4377330 | 4.7406748 |
| C  | 4.9301030 | 6.0255526 | 4.8064399 |
| C  | 5.3679675 | 6.2884255 | 3.4698576 |
| C  | 4.3338624 | 5.8512402 | 2.5768302 |
| Fe | 3.6021632 | 7.2877937 | 3.8385025 |
| C  | 3.4223762 | 9.0637145 | 4.8676551 |
| C  | 2.1501338 | 8.3917054 | 4.7518701 |
| C  | 1.8812462 | 8.2585464 | 3.3512668 |

|    |            |            |            |
|----|------------|------------|------------|
| C  | 2.9893646  | 8.8111957  | 2.6220218  |
| C  | 3.9749026  | 9.2943679  | 3.5493056  |
| C  | 5.2778739  | 9.9546111  | 3.2427159  |
| N  | 4.0466448  | 9.3681736  | 6.0351680  |
| C  | 4.5204706  | 9.8199594  | 7.0222903  |
| Ni | 3.8397512  | 12.1646382 | 7.4934718  |
| S  | 1.6941217  | 11.7796587 | 6.8452721  |
| C  | 2.2259822  | 12.2094993 | 5.2441986  |
| N  | 1.4593298  | 12.2158305 | 4.1606805  |
| C  | 2.0221082  | 12.4695117 | 2.8203305  |
| C  | 1.9957884  | 13.9550201 | 2.4624493  |
| C  | 1.9799765  | 4.7229532  | 2.8292570  |
| Fe | 5.4884951  | 10.1154621 | 8.6218972  |
| S  | 3.6147270  | 11.2515427 | 9.5475068  |
| C  | 4.3256979  | 12.5475820 | 10.6959078 |
| N  | 4.9617927  | 13.6366605 | 9.9814009  |
| C  | 6.2391128  | 13.3484407 | 9.3610576  |
| S  | 6.0740963  | 12.2793510 | 7.8320218  |
| C  | 6.4879303  | 10.3864389 | 10.2338212 |
| N  | 7.0830686  | 10.6061602 | 11.2199358 |
| C  | 4.9031156  | 8.5705743  | 9.3136067  |
| O  | 4.5233232  | 7.5806062  | 9.7590669  |
| C  | 6.9808733  | 9.4387215  | 7.9025024  |
| O  | 7.9446199  | 9.0108588  | 7.4423467  |
| S  | 3.9108321  | 12.6502920 | 5.2759675  |
| C  | -0.0056427 | 12.0456132 | 4.2369459  |
| C  | -0.4367126 | 10.6062339 | 3.9722990  |
| H  | 3.1008165  | 8.8210163  | 1.5408242  |
| H  | 1.0042787  | 7.7841065  | 2.9201500  |
| H  | 6.3019116  | 6.7654090  | 3.1851220  |
| H  | 4.3470198  | 5.9332061  | 1.4930681  |
| H  | 6.9338304  | 12.8064638 | 10.0237463 |
| H  | 6.6836412  | 14.2894260 | 9.0129040  |
| H  | 4.9821391  | 14.4982882 | 10.5275122 |
| H  | 3.4682352  | 12.9446278 | 11.2540977 |
| H  | 5.0124809  | 12.0045726 | 11.3656597 |
| H  | -0.3390140 | 12.3822719 | 5.2287337  |
| H  | -0.4329707 | 12.7322655 | 3.4906553  |
| H  | -1.5345352 | 10.5417031 | 3.9746625  |
| H  | -0.0674364 | 10.2603620 | 2.9959514  |
| H  | -0.0375630 | 9.9405465  | 4.7485093  |
| H  | 3.0464122  | 12.0689653 | 2.8018322  |
| H  | 1.4213356  | 11.8747073 | 2.1164111  |
| H  | 2.3898490  | 14.1023355 | 1.4465343  |
| H  | 0.9683904  | 14.3474552 | 2.4916198  |
| H  | 2.6146344  | 14.5299249 | 3.1655328  |
| H  | 6.0161970  | 9.7494064  | 4.0309421  |
| H  | 5.6764569  | 9.5970130  | 2.2836745  |
| H  | 5.1555140  | 11.0492143 | 3.1866802  |
| H  | 3.0093816  | 5.1500488  | 5.5885636  |
| H  | 5.4690578  | 6.2816636  | 5.7151145  |
| H  | 1.7071189  | 5.1645321  | 1.8602137  |
| H  | 2.1047402  | 3.6375657  | 2.6803724  |
| H  | 1.1487249  | 4.8714190  | 3.5332073  |
| H  | 1.5276366  | 8.0761827  | 5.5832940  |
| H  | 3.8341967  | 13.8524495 | 8.4731731  |
| H  | 3.3754641  | 13.8835724 | 7.8083439  |

Model  $\text{d}_{\text{RS}}^{\text{disp}}-\text{H}_2$ :

|    |           |           |           |
|----|-----------|-----------|-----------|
| C  | 4.0049631 | 9.0258841 | 3.4948736 |
| C  | 3.4082507 | 8.8792982 | 4.8096688 |
| C  | 2.1344790 | 8.2020295 | 4.6963084 |
| C  | 1.9195034 | 7.9726542 | 3.2979625 |
| C  | 3.0523199 | 8.4765987 | 2.5715646 |
| Fe | 3.6348259 | 7.0652966 | 3.9309459 |



|    |            |            |            |
|----|------------|------------|------------|
| C  | 4.4865535  | 5.5647402  | 2.8316248  |
| C  | 3.3637585  | 5.0556573  | 3.5730810  |
| C  | 3.6349663  | 5.2924836  | 4.9662064  |
| C  | 4.9104141  | 5.9364837  | 5.0780152  |
| C  | 5.4384922  | 6.1100688  | 3.7568091  |
| C  | 2.1617983  | 4.3677759  | 3.0058256  |
| N  | 4.0088247  | 9.2593133  | 5.9702706  |
| C  | 4.5471178  | 9.6641642  | 6.9391591  |
| Fe | 5.5337701  | 9.9878530  | 8.5310947  |
| C  | 7.0290216  | 9.3108093  | 7.8231193  |
| O  | 7.9950363  | 8.8827196  | 7.3680700  |
| C  | 5.3088891  | 9.6909290  | 3.1988942  |
| Ni | 3.8065617  | 12.1351384 | 7.3806556  |
| S  | 3.8680004  | 12.7402193 | 5.2127627  |
| C  | 2.1638039  | 12.3842967 | 5.1818159  |
| N  | 1.3582009  | 12.5924730 | 4.1493707  |
| C  | -0.0756689 | 12.2506434 | 4.1998332  |
| C  | -0.3304293 | 10.8669457 | 3.6041843  |
| S  | 1.6809444  | 11.7635933 | 6.7350191  |
| S  | 3.6268587  | 11.1088807 | 9.4071839  |
| C  | 4.2815441  | 12.4143341 | 10.5461062 |
| N  | 4.9093818  | 13.5374842 | 9.7985223  |
| C  | 6.2287291  | 13.2512757 | 9.1719036  |
| S  | 6.0634344  | 12.1502679 | 7.6916411  |
| C  | 1.8478519  | 13.2026470 | 2.8971499  |
| C  | 1.7205610  | 14.7256446 | 2.9395903  |
| C  | 6.5124656  | 10.3516476 | 10.1354265 |
| N  | 7.0741498  | 10.6774976 | 11.1123796 |
| C  | 4.9892592  | 8.4402353  | 9.2443768  |
| O  | 4.6339462  | 7.4481282  | 9.7052581  |
| H  | 3.1998554  | 8.4098501  | 1.4967612  |
| H  | 1.0615852  | 7.4631601  | 2.8676537  |
| H  | 6.3762333  | 6.5952746  | 3.5001360  |
| H  | 4.5751478  | 5.5631133  | 1.7482917  |
| H  | 6.8994790  | 12.7745099 | 9.8994856  |
| H  | 6.6326639  | 14.2061390 | 8.8127875  |
| H  | 4.9769996  | 14.3683509 | 10.3999663 |
| H  | 3.4192518  | 12.8246305 | 11.0867989 |
| H  | 5.0101610  | 11.9599542 | 11.2310423 |
| H  | -0.4080383 | 12.3025624 | 5.2467932  |
| H  | -0.6069256 | 13.0358287 | 3.6418138  |
| H  | -1.4035476 | 10.6323527 | 3.6518485  |
| H  | -0.0150677 | 10.8296416 | 2.5508978  |
| H  | 0.2300709  | 10.1024307 | 4.1606365  |
| H  | 2.8926729  | 12.8948697 | 2.7454554  |
| H  | 1.2501925  | 12.7694513 | 2.0822130  |
| H  | 2.0559521  | 15.1562992 | 1.9851355  |
| H  | 0.6757127  | 15.0273420 | 3.1053931  |
| H  | 2.3410171  | 15.1374107 | 3.7479681  |
| H  | 6.0351485  | 9.5040716  | 4.0034446  |
| H  | 5.7300287  | 9.3151268  | 2.2564945  |
| H  | 5.1801166  | 10.7833918 | 3.1142613  |
| H  | 2.9669096  | 5.0456763  | 5.7872466  |
| H  | 5.3725881  | 6.2796239  | 6.0000162  |
| H  | 1.9463381  | 4.7223914  | 1.9876985  |
| H  | 2.3343216  | 3.2796022  | 2.9532011  |
| H  | 1.2754867  | 4.5363815  | 3.6340989  |
| H  | 1.4817585  | 7.9395778  | 5.5230376  |
| H  | 3.5301095  | 13.6411790 | 7.9166154  |
| H  | 4.1602315  | 13.7136871 | 8.8460705  |

Model<sup>disp</sup>e:

|   |           |           |           |
|---|-----------|-----------|-----------|
| C | 5.5028978 | 4.8204055 | 4.8139873 |
| C | 4.4722347 | 4.3800465 | 3.9081734 |
| C | 3.1981110 | 4.6466043 | 4.5262250 |
| C | 3.4685726 | 5.2089685 | 5.8280078 |
| C | 4.8901580 | 5.3519482 | 5.9971457 |

|    |            |            |            |
|----|------------|------------|------------|
| Fe | 4.2622535  | 6.3605329  | 4.3478888  |
| C  | 3.2287945  | 8.1213450  | 4.3644866  |
| C  | 3.1927958  | 7.5238835  | 3.0595364  |
| C  | 4.5474597  | 7.3788362  | 2.6030026  |
| C  | 5.4296177  | 7.8810996  | 3.6225469  |
| C  | 4.6048200  | 8.3418598  | 4.7087905  |
| H  | 2.3004402  | 7.1974958  | 2.5316198  |
| C  | 6.9252250  | 7.9379981  | 3.5584500  |
| C  | 1.8234890  | 4.3733794  | 4.0073050  |
| N  | 1.2653974  | 3.1339803  | 4.5566978  |
| C  | -0.1506957 | 3.0200350  | 4.2208219  |
| N  | 2.4940799  | 5.5513841  | 6.7215880  |
| C  | 1.8006461  | 5.3125984  | 7.6736848  |
| Ni | 2.2483534  | 3.6794142  | 9.0013027  |
| S  | 4.4792729  | 3.9587189  | 9.2578607  |
| C  | 4.6327303  | 2.8402919  | 7.9336685  |
| N  | 5.7882154  | 2.4716177  | 7.3673432  |
| C  | 7.0949152  | 2.7945421  | 7.9577888  |
| C  | 7.8280499  | 3.9119022  | 7.2162732  |
| C  | 2.0065067  | 1.9737014  | 4.0805918  |
| Fe | 0.2532155  | 5.5341444  | 8.7704327  |
| C  | -1.2979437 | 5.6370170  | 9.9037972  |
| N  | -2.2307062 | 5.6691742  | 10.6150356 |
| S  | 0.0992728  | 3.1403710  | 8.6813597  |
| C  | -0.6243739 | 2.6119385  | 10.2994063 |
| C  | 0.3173579  | 2.7387006  | 11.4920474 |
| C  | 0.6404734  | 4.1785136  | 11.8749277 |
| S  | 1.6704104  | 5.0884666  | 10.6381521 |
| S  | 3.0710942  | 2.2873478  | 7.4290019  |
| C  | 0.5170194  | 7.2804798  | 8.9399205  |
| O  | 0.6901586  | 8.4192778  | 9.0365664  |
| C  | -0.7734076 | 5.6376967  | 7.3324272  |
| O  | -1.4286140 | 5.6918409  | 6.3800726  |
| C  | 5.8008969  | 1.6422734  | 6.1529081  |
| C  | 5.7707292  | 0.1481991  | 6.4770051  |
| C  | 4.6774956  | 3.7463850  | 2.5691631  |
| H  | 6.5704959  | 4.7969549  | 4.6096444  |
| H  | 4.8628027  | 6.9242921  | 1.6667276  |
| H  | -1.5362649 | 3.2054513  | 10.4575787 |
| H  | -0.8938203 | 1.5570871  | 10.1431311 |
| H  | 1.2517731  | 2.1865364  | 11.2917221 |
| H  | -0.1745668 | 2.2637465  | 12.3596882 |
| H  | 1.2409936  | 4.1994975  | 12.7959696 |
| H  | -0.2810222 | 4.7600380  | 12.0219201 |
| H  | 6.9347883  | 3.0672279  | 9.0101344  |
| H  | 7.6879730  | 1.8655109  | 7.9392530  |
| H  | 8.8304846  | 4.0482713  | 7.6490738  |
| H  | 7.9426017  | 3.6687225  | 6.1496552  |
| H  | 7.2750899  | 4.8560331  | 7.2991976  |
| H  | 4.9374161  | 1.9383726  | 5.5387055  |
| H  | 6.7094921  | 1.9120355  | 5.5942897  |
| H  | 5.8144230  | -0.4424992 | 5.5498250  |
| H  | 6.6294462  | -0.1318287 | 7.1064011  |
| H  | 4.8437590  | -0.1023422 | 7.0115897  |
| H  | 1.8431208  | 4.3512819  | 2.8912658  |
| H  | 4.9709374  | 8.7463613  | 5.6490472  |
| H  | 2.3719850  | 8.3173567  | 5.0034391  |
| H  | 7.3215112  | 7.1357779  | 2.9185101  |
| H  | 7.2646627  | 8.9021598  | 3.1422173  |
| H  | 7.3646861  | 7.8318573  | 4.5615449  |
| H  | 5.3684837  | 5.7701677  | 6.8757262  |
| H  | 1.1619218  | 5.1995983  | 4.3114742  |
| H  | 1.5880596  | 1.0614890  | 4.5298926  |
| H  | 1.9649605  | 1.8789050  | 2.9690466  |
| H  | 3.0590665  | 2.0588271  | 4.3875511  |
| H  | -0.5626989 | 2.1117866  | 4.6844755  |
| H  | -0.6949821 | 3.8906022  | 4.6145007  |
| H  | -0.3199472 | 2.9614439  | 3.1193202  |
| H  | 4.7115987  | 2.6459484  | 2.6535426  |
| H  | 3.8513050  | 3.9975409  | 1.8881256  |
| H  | 5.6201644  | 4.0858098  | 2.1152325  |

Model <sup>disp</sup>e<sup>+</sup>:

|    |            |            |            |
|----|------------|------------|------------|
| C  | 5.6867818  | 5.3909522  | 4.3111785  |
| C  | 4.6170388  | 4.8345821  | 3.5259803  |
| C  | 3.4438146  | 4.7832194  | 4.3505426  |
| C  | 3.8187359  | 5.2710818  | 5.6559545  |
| C  | 5.2015359  | 5.6826526  | 5.6301621  |
| Fe | 4.1360966  | 6.7250709  | 4.2434932  |
| C  | 2.7197930  | 8.1876458  | 4.4726405  |
| C  | 2.7974857  | 7.7936544  | 3.0964999  |
| C  | 4.1322409  | 8.0454841  | 2.6430183  |
| C  | 4.8927326  | 8.5956956  | 3.7274047  |
| C  | 4.0133854  | 8.6752209  | 4.8629819  |
| H  | 1.9959746  | 7.3487639  | 2.5130064  |
| C  | 6.3272258  | 9.0163837  | 3.6859856  |
| C  | 2.0722907  | 4.2901758  | 4.0168948  |
| N  | 1.8156908  | 2.9804216  | 4.6252650  |
| C  | 0.4063310  | 2.6134524  | 4.5214951  |
| N  | 2.9554321  | 5.3630465  | 6.6957876  |
| C  | 2.1412187  | 5.2008251  | 7.5465650  |
| Ni | 2.2619737  | 3.5315176  | 8.9856357  |
| S  | 4.5225262  | 3.6015965  | 9.2090918  |
| C  | 4.5234447  | 2.2972884  | 8.0552356  |
| N  | 5.6077953  | 1.7035699  | 7.5702506  |
| C  | 6.9656108  | 2.1118952  | 7.9777838  |
| C  | 7.5556348  | 3.1130086  | 6.9848132  |
| C  | 2.6837765  | 1.9454342  | 4.0756052  |
| Fe | 0.5956840  | 5.5658274  | 8.6068616  |
| C  | -0.9546916 | 5.9655467  | 9.6569863  |
| N  | -1.8910995 | 6.1706508  | 10.3316339 |
| S  | 0.0706485  | 3.2592522  | 8.6267032  |
| C  | -0.7506517 | 2.9016580  | 10.2439205 |
| C  | 0.1711127  | 2.9601657  | 11.4561613 |
| C  | 0.6775198  | 4.3586494  | 11.7894118 |
| S  | 1.8516406  | 5.0748034  | 10.5547999 |
| S  | 2.8869176  | 1.8759887  | 7.6211060  |
| C  | 1.0631495  | 7.2902929  | 8.7412149  |
| O  | 1.3632654  | 8.3985373  | 8.8181362  |
| C  | -0.3828589 | 5.7380065  | 7.1233742  |
| O  | -0.9974924 | 5.8314564  | 6.1522011  |
| C  | 5.5179359  | 0.5907456  | 6.6038100  |
| C  | 5.4415606  | -0.7597523 | 7.3154669  |
| C  | 4.6979603  | 4.3950052  | 2.0992965  |
| H  | 6.6919708  | 5.5900390  | 3.9480806  |
| H  | 4.5261965  | 7.8124292  | 1.6567702  |
| H  | -1.5791319 | 3.6182739  | 10.3414582 |
| H  | -1.1538872 | 1.8867202  | 10.1189192 |
| H  | 1.0206302  | 2.2698708  | 11.3215530 |
| H  | -0.4069701 | 2.6040002  | 12.3261996 |
| H  | 1.2544280  | 4.3428081  | 12.7250092 |
| H  | -0.1559624 | 5.0699871  | 11.8826290 |
| H  | 6.9112028  | 2.5397383  | 8.9886172  |
| H  | 7.5697362  | 1.1944581  | 8.0323337  |
| H  | 8.5654838  | 3.4074820  | 7.3045310  |
| H  | 7.6253430  | 2.6741806  | 5.9782304  |
| H  | 6.9217054  | 4.0092706  | 6.9333473  |
| H  | 4.6364275  | 0.7579947  | 5.9683017  |
| H  | 6.4118591  | 0.6588985  | 5.9665541  |
| H  | 5.4165855  | -1.5724005 | 6.5750078  |
| H  | 6.3169728  | -0.9119686 | 7.9639477  |
| H  | 4.5316425  | -0.8151497 | 7.9291915  |
| H  | 1.9458578  | 4.2620575  | 2.9108822  |
| H  | 4.2939147  | 9.0290479  | 5.8516216  |
| H  | 1.8464923  | 8.1025554  | 5.1141403  |
| H  | 6.8842050  | 8.4528491  | 2.9243815  |
| H  | 6.3993352  | 10.0872181 | 3.4323402  |
| H  | 6.8118142  | 8.8714153  | 4.6619576  |
| H  | 5.7482773  | 6.1136975  | 6.4630463  |
| H  | 1.3258246  | 4.9930010  | 4.4174714  |
| H  | 2.4882801  | 0.9970846  | 4.5960459  |
| H  | 2.5144826  | 1.7937621  | 2.9859009  |

|   |            |           |           |
|---|------------|-----------|-----------|
| H | 3.7369673  | 2.2231533 | 4.2321617 |
| H | 0.2381050  | 1.6697033 | 5.0595722 |
| H | -0.2142685 | 3.3965231 | 4.9804649 |
| H | 0.0828832  | 2.4788297 | 3.4658464 |
| H | 4.9253562  | 3.3173709 | 2.0400467 |
| H | 3.7429397  | 4.5608018 | 1.5809291 |
| H | 5.4882527  | 4.9392610 | 1.5645833 |

Model <sup>disp</sup>e<sup>+</sup>-2H:

|    |            |            |            |
|----|------------|------------|------------|
| C  | 3.9778101  | 9.6473381  | 4.3430117  |
| C  | 2.9794024  | 9.8691459  | 5.3533782  |
| C  | 1.6993931  | 9.9599874  | 4.6863315  |
| C  | 1.9433964  | 9.7995241  | 3.2620144  |
| C  | 3.3517663  | 9.5903305  | 3.0553682  |
| Fe | 2.5567995  | 8.1791894  | 4.2952780  |
| C  | 1.5702446  | 6.5461124  | 3.5398676  |
| C  | 1.2648548  | 6.7228800  | 4.9296653  |
| C  | 2.4973088  | 6.6629330  | 5.6637215  |
| C  | 3.5729822  | 6.4496978  | 4.7334433  |
| C  | 2.9885222  | 6.3785892  | 3.4201284  |
| C  | 5.0233294  | 6.2998804  | 5.0706351  |
| C  | 0.3649814  | 10.1419477 | 5.3032566  |
| N  | -0.0965650 | 11.5938262 | 5.3316349  |
| C  | 0.8845955  | 12.5012029 | 5.9884268  |
| N  | 0.9607758  | 9.8600316  | 2.3147435  |
| C  | -0.0609045 | 10.1140219 | 1.7708310  |
| Fe | -1.6484214 | 10.2810093 | 0.8254576  |
| C  | -3.2733313 | 10.3634016 | -0.1975389 |
| N  | -4.2648102 | 10.3994993 | -0.8217838 |
| C  | -0.9353081 | 9.5018993  | -0.6233928 |
| O  | -0.4818379 | 9.0118863  | -1.5599579 |
| C  | -2.3133199 | 8.7886700  | 1.5537859  |
| O  | -2.7494513 | 7.8434871  | 2.0494258  |
| S  | -0.9613383 | 12.4423078 | 0.1395928  |
| Ni | -0.9327811 | 13.1823032 | 2.3132649  |
| S  | -1.5404839 | 14.6688439 | 3.9984240  |
| C  | -0.2603688 | 15.6635380 | 3.3397917  |
| N  | 0.0255970  | 16.8940948 | 3.7576759  |
| C  | 1.0963639  | 17.6981696 | 3.1348804  |
| C  | 2.4194584  | 17.5376743 | 3.8828661  |
| S  | -2.5665635 | 11.6685478 | 2.5184451  |
| C  | -3.9415821 | 12.6246828 | 1.6970650  |
| C  | -3.4598736 | 13.7153439 | 0.7353528  |
| C  | -2.5267284 | 13.2921021 | -0.4034174 |
| S  | 0.5535896  | 14.8473744 | 2.0352404  |
| C  | -0.7383217 | 17.5552544 | 4.8343252  |
| C  | -1.9032109 | 18.3681647 | 4.2693218  |
| C  | -1.4494422 | 11.6971299 | 5.9488366  |
| C  | 3.2203278  | 10.0054461 | 6.8239073  |
| H  | 5.0358601  | 9.4915998  | 4.5369243  |
| H  | 0.2758462  | 6.8901729  | 5.3490046  |
| H  | 2.6122624  | 6.7878494  | 6.7376489  |
| H  | -4.5796703 | 11.8863958 | 1.1962077  |
| H  | -4.4879908 | 13.0909286 | 2.5291600  |
| H  | -2.9735112 | 14.5145806 | 1.3218723  |
| H  | -4.3591623 | 14.1594425 | 0.2752565  |
| H  | -2.1800251 | 14.1899244 | -0.9346637 |
| H  | -3.0261843 | 12.6169020 | -1.1081770 |
| H  | 1.1946679  | 17.3914449 | 2.0840540  |
| H  | 0.7526109  | 18.7430670 | 3.1485845  |
| H  | 3.1877893  | 18.1768998 | 3.4244883  |
| H  | 2.3119964  | 17.8322306 | 4.9375447  |
| H  | 2.7598474  | 16.4933784 | 3.8353258  |
| H  | -1.0979167 | 16.7834498 | 5.5289637  |

|   |            |            |           |
|---|------------|------------|-----------|
| H | -0.0262431 | 18.1960745 | 5.3749988 |
| H | -2.4297595 | 18.8842230 | 5.0850773 |
| H | -1.5453083 | 19.1264258 | 3.5571326 |
| H | -2.6131245 | 17.7049033 | 3.7557170 |
| H | 0.1318259  | 12.2925709 | 2.9883143 |
| H | -0.4093019 | 9.6020919  | 4.7408346 |
| H | 0.3621065  | 9.7954617  | 6.3464775 |
| H | 3.5420474  | 6.2564454  | 2.4929157 |
| H | 0.8585827  | 6.5787641  | 2.7191605 |
| H | 5.2803377  | 6.8709356  | 5.9746819 |
| H | 5.2653120  | 5.2411574  | 5.2621536 |
| H | 5.6597515  | 6.6449765  | 4.2430907 |
| H | 3.8300725  | 9.4150439  | 2.0967814 |
| H | 0.5013386  | 13.5243439 | 5.8885471 |
| H | 0.9819058  | 12.2151314 | 7.0439783 |
| H | 1.8462602  | 12.3995435 | 5.4730620 |
| H | -1.7493859 | 12.7510641 | 5.9455959 |
| H | -2.1522599 | 11.1092198 | 5.3462588 |
| H | -1.3938830 | 11.3135652 | 6.9766794 |
| H | -0.1541251 | 11.9267805 | 4.2987541 |
| H | 3.4185565  | 11.0549039 | 7.1016737 |
| H | 2.3524844  | 9.6580712  | 7.4055572 |
| H | 4.0915323  | 9.4096056  | 7.1296313 |

Model <sup>solv</sup>e:

|    |           |            |            |
|----|-----------|------------|------------|
| C  | 3.5477028 | 4.7148032  | 3.7144048  |
| C  | 3.8000612 | 5.0649999  | 5.0790454  |
| C  | 5.0757544 | 5.7190414  | 5.1521632  |
| C  | 5.6479113 | 5.7941517  | 3.8373308  |
| C  | 4.7023879 | 5.1363317  | 2.9523021  |
| Fe | 3.8121945 | 6.7392773  | 3.8922058  |
| C  | 2.0780822 | 7.6467102  | 3.2371790  |
| C  | 3.2011834 | 8.1066825  | 2.4725572  |
| C  | 4.1383062 | 8.7060461  | 3.3783085  |
| C  | 3.5858058 | 8.6182128  | 4.7007681  |
| C  | 2.3063121 | 7.9623287  | 4.6236813  |
| C  | 1.3555195 | 7.7287836  | 5.7596229  |
| C  | 6.9982425 | 6.3145092  | 3.4580639  |
| N  | 4.8838025 | 4.9439126  | 1.6165284  |
| C  | 5.1327047 | 4.5854718  | 0.5055083  |
| Fe | 5.1490788 | 4.8647076  | -1.4233814 |
| C  | 5.2006009 | 5.0880391  | -3.3320162 |
| N  | 5.2146025 | 5.2639677  | -4.4941494 |
| C  | 3.4501152 | 5.3643051  | -1.4098549 |
| O  | 2.3388535 | 5.6897466  | -1.4128375 |
| C  | 5.8259388 | 6.4875538  | -1.2203617 |
| O  | 6.2726413 | 7.5491348  | -1.0995750 |
| S  | 7.3373402 | 3.9184162  | -1.3717554 |
| Ni | 6.0520628 | 2.6937221  | 0.0024564  |
| S  | 7.5979107 | 2.4707719  | 1.6275490  |
| C  | 6.4737051 | 1.3773422  | 2.3866181  |
| N  | 6.7030322 | 0.7006756  | 3.5096987  |
| C  | 5.6904553 | -0.2105067 | 4.0809351  |
| C  | 4.8340377 | 0.4607083  | 5.1544558  |
| S  | 4.5006260 | 2.5750546  | -1.6119381 |
| C  | 5.2765505 | 1.8934740  | -3.1555520 |
| C  | 6.7874981 | 1.7031442  | -3.0959579 |
| C  | 7.5917316 | 2.9904039  | -2.9602660 |
| S  | 5.0206146 | 1.2806542  | 1.4288179  |
| C  | 7.9896863 | 0.8206692  | 4.2265300  |

|   |           |            |            |
|---|-----------|------------|------------|
| C | 8.9988014 | -0.2497345 | 3.8084117  |
| H | 5.5318028 | 6.1248808  | 6.0520655  |
| H | 3.1239186 | 4.8895967  | 5.9114855  |
| H | 5.1024765 | 9.1324650  | 3.1138379  |
| H | 4.0612740 | 8.9653990  | 5.6154817  |
| H | 7.3685396 | 3.6904180  | -3.7760678 |
| H | 8.6676468 | 2.7689169  | -2.9664781 |
| H | 7.0458786 | 1.0124691  | -2.2775169 |
| H | 7.0975997 | 1.2156415  | -4.0370619 |
| H | 4.7766872 | 0.9253862  | -3.2961358 |
| H | 4.9896038 | 2.5631765  | -3.9772094 |
| H | 5.0658879 | -0.5772788 | 3.2549807  |
| H | 6.2316837 | -1.0742970 | 4.4919060  |
| H | 4.1110494 | -0.2658200 | 5.5514867  |
| H | 5.4471207 | 0.8209902  | 5.9925121  |
| H | 4.2772238 | 1.3102349  | 4.7370176  |
| H | 8.3878523 | 1.8268138  | 4.0355383  |
| H | 7.7653233 | 0.7537851  | 5.2998812  |
| H | 9.9256121 | -0.1223430 | 4.3853368  |
| H | 8.6159519 | -1.2616011 | 4.0016596  |
| H | 9.2423318 | -0.1633525 | 2.7408667  |
| H | 6.9959493 | 6.7512334  | 2.4501980  |
| H | 7.3327813 | 7.0849957  | 4.1653953  |
| H | 7.7430161 | 5.5014644  | 3.4641171  |
| H | 1.2065370 | 7.1288739  | 2.8429125  |
| H | 3.3320273 | 7.9937418  | 1.3993033  |
| H | 1.8904044 | 7.5946414  | 6.7101304  |
| H | 0.6792699 | 8.5918533  | 5.8797523  |
| H | 0.7314875 | 6.8417239  | 5.5850554  |
| H | 2.6762923 | 4.2078319  | 3.3109696  |

Model <sup>sol</sup>v c<sup>+</sup>:

|    |           |           |            |
|----|-----------|-----------|------------|
| C  | 3.7969304 | 4.7940663 | 3.9104110  |
| C  | 4.1792665 | 5.1545232 | 5.2407202  |
| C  | 5.4600096 | 5.8011018 | 5.1794360  |
| C  | 5.9052274 | 5.8403281 | 3.8156909  |
| C  | 4.8843571 | 5.1693216 | 3.0415471  |
| Fe | 4.0505425 | 6.8663477 | 4.1055122  |
| C  | 2.8820036 | 8.1833196 | 2.9156642  |
| C  | 4.1417266 | 8.7656098 | 3.2736037  |
| C  | 4.1959634 | 8.8347058 | 4.7068847  |
| C  | 2.9715008 | 8.2860414 | 5.2153272  |
| C  | 2.1445133 | 7.8964959 | 4.1082871  |
| C  | 0.7696098 | 7.3165863 | 4.1891262  |
| C  | 7.2031347 | 6.3649745 | 3.2973363  |
| N  | 4.9077872 | 5.0137186 | 1.6991637  |
| C  | 5.0728100 | 4.5927546 | 0.5830573  |
| Fe | 4.9613829 | 4.7880779 | -1.3249176 |
| C  | 4.8750853 | 4.9767430 | -3.2393183 |
| N  | 4.8070912 | 5.1255040 | -4.4019304 |
| C  | 3.2555912 | 5.2915707 | -1.2336577 |
| O  | 2.1493837 | 5.6182517 | -1.1879676 |
| C  | 5.6581683 | 6.4236632 | -1.2323619 |
| O  | 6.1096494 | 7.4848092 | -1.1789473 |
| S  | 7.1517909 | 3.8564258 | -1.4295640 |
| Ni | 5.9078583 | 2.7406150 | 0.0807433  |
| S  | 7.5470512 | 2.5422309 | 1.6154963  |

|   |            |            |            |
|---|------------|------------|------------|
| C | 6.4707905  | 1.4495996  | 2.4493843  |
| N | 6.7757142  | 0.7553345  | 3.5375568  |
| C | 5.8020420  | -0.1664722 | 4.1633322  |
| C | 5.0231807  | 0.4863181  | 5.3046076  |
| S | 4.2707092  | 2.5106292  | -1.4405020 |
| C | 4.9568883  | 1.7783639  | -3.0000581 |
| C | 6.4664192  | 1.5788317  | -3.0220721 |
| C | 7.2805076  | 2.8661530  | -2.9923814 |
| S | 4.9511074  | 1.3723172  | 1.5950319  |
| C | 8.1164417  | 0.8471606  | 4.1573301  |
| C | 9.0654484  | -0.2453914 | 3.6646420  |
| H | 6.0128030  | 6.2046558  | 6.0238949  |
| H | 3.5929533  | 4.9773326  | 6.1379035  |
| H | 5.0183424  | 9.2224234  | 5.3019793  |
| H | 2.7134308  | 8.1672574  | 6.2649098  |
| H | 7.0030399  | 3.5384010  | -3.8149984 |
| H | 8.3534024  | 2.6418511  | -3.0632323 |
| H | 6.7730073  | 0.9176690  | -2.1962905 |
| H | 6.7150488  | 1.0541764  | -3.9606495 |
| H | 4.4407448  | 0.8116443  | -3.0741343 |
| H | 4.6228167  | 2.4231223  | -3.8240646 |
| H | 5.1230366  | -0.5226634 | 3.3766654  |
| H | 6.3724490  | -1.0341937 | 4.5217511  |
| H | 4.3393058  | -0.2526540 | 5.7447041  |
| H | 5.6935350  | 0.8421342  | 6.0991805  |
| H | 4.4248564  | 1.3325318  | 4.9408166  |
| H | 8.5211279  | 1.8449081  | 3.9381238  |
| H | 7.9691854  | 0.7837586  | 5.2439762  |
| H | 10.0349908 | -0.1361307 | 4.1700394  |
| H | 8.6778187  | -1.2483233 | 3.8904982  |
| H | 9.2295740  | -0.1658362 | 2.5817201  |
| H | 7.1002148  | 6.7915455  | 2.2910681  |
| H | 7.6130319  | 7.1321600  | 3.9655382  |
| H | 7.9355803  | 5.5441074  | 3.2334153  |
| H | 2.5433256  | 7.9686238  | 1.9046645  |
| H | 4.9140383  | 9.0982910  | 2.5855307  |
| H | 0.6313269  | 6.7270907  | 5.1042850  |
| H | 0.0329940  | 8.1364797  | 4.2092663  |
| H | 0.5411530  | 6.6885830  | 3.3187857  |
| H | 2.8842660  | 4.2957771  | 3.5973561  |

Model<sup>solv</sup>c<sup>+</sup>-H<sub>2</sub>:

|    |            |            |            |
|----|------------|------------|------------|
| C  | 3.1729529  | 9.6758473  | 3.3379934  |
| C  | 3.9581880  | 9.4430590  | 4.5078427  |
| C  | 3.0768553  | 9.3888249  | 5.6406786  |
| C  | 1.7271779  | 9.6009086  | 5.2010889  |
| C  | 1.8058874  | 9.7882909  | 3.7709251  |
| Fe | 2.5946607  | 7.9045232  | 4.2799974  |
| C  | 3.3125577  | 6.2360059  | 3.2092660  |
| C  | 1.9023366  | 6.3866590  | 3.0318325  |
| C  | 1.2840572  | 6.3132352  | 4.3247185  |
| C  | 2.3257964  | 6.1198970  | 5.2936858  |
| C  | 3.5882700  | 6.0605076  | 4.6055374  |
| C  | 4.9281985  | 5.8241953  | 5.2269446  |
| C  | 0.4989067  | 9.6962099  | 6.0462591  |
| N  | 0.7383094  | 10.0447061 | 2.9551940  |
| C  | -0.1749592 | 10.3431236 | 2.2666015  |
| Fe | -1.6473561 | 10.5015870 | 1.1306379  |
| C  | -3.1666879 | 10.4413620 | -0.0523715 |
| N  | -4.0804769 | 10.3071680 | -0.7767255 |
| C  | -0.8047001 | 9.5255573  | -0.1137625 |
| O  | -0.2645369 | 8.9164172  | -0.9294853 |

|    |            |            |            |
|----|------------|------------|------------|
| C  | -2.4549034 | 9.1551125  | 1.9925564  |
| O  | -2.9927564 | 8.3001123  | 2.5479044  |
| S  | -2.6317115 | 12.1509212 | 2.5283000  |
| Ni | -0.9763124 | 13.6582539 | 2.1690413  |
| S  | -1.4903503 | 15.1321606 | 3.8281279  |
| C  | -0.4377389 | 16.2477299 | 2.9928199  |
| N  | -0.1944789 | 17.4946153 | 3.3736203  |
| C  | 0.7227379  | 18.3695433 | 2.6092016  |
| C  | 2.1536041  | 18.3272437 | 3.1455269  |
| S  | -0.8568910 | 12.5393130 | 0.2038990  |
| C  | -2.3451570 | 13.3376907 | -0.5882596 |
| C  | -3.3625852 | 13.9179462 | 0.3949502  |
| C  | -3.9218596 | 12.9902960 | 1.4746168  |
| S  | 0.2369796  | 15.4878320 | 1.5733203  |
| C  | -0.8351765 | 18.0745153 | 4.5751633  |
| C  | -2.1117508 | 18.8461977 | 4.2418184  |
| H  | 3.3724397  | 9.2147811  | 6.6720486  |
| H  | 5.0366149  | 9.3138322  | 4.5287850  |
| H  | 0.2211444  | 6.3934395  | 4.5362173  |
| H  | 2.1912122  | 6.0386165  | 6.3697414  |
| H  | -4.5529035 | 12.1951074 | 1.0624683  |
| H  | -4.5116809 | 13.5774529 | 2.1911862  |
| H  | -2.9195938 | 14.8025217 | 0.8820698  |
| H  | -4.2177241 | 14.2888447 | -0.1960613 |
| H  | -1.9200988 | 14.1485612 | -1.1950275 |
| H  | -2.7830630 | 12.5873918 | -1.2553908 |
| H  | 0.6871545  | 18.0569008 | 1.5569586  |
| H  | 0.3093408  | 19.3858064 | 2.6647017  |
| H  | 2.7796218  | 19.0123469 | 2.5572370  |
| H  | 2.1997099  | 18.6438238 | 4.1967012  |
| H  | 2.5767268  | 17.3168343 | 3.0624353  |
| H  | -1.0425267 | 17.2536338 | 5.2746052  |
| H  | -0.0890587 | 18.7288729 | 5.0465419  |
| H  | -2.5299566 | 19.2689077 | 5.1658340  |
| H  | -1.9125211 | 19.6757477 | 3.5495469  |
| H  | -2.8659243 | 18.1858952 | 3.7929767  |
| H  | 0.6906677  | 12.9059057 | 2.8301895  |
| H  | 0.2321825  | 12.8658419 | 3.4532261  |
| H  | -0.3984698 | 9.3720914  | 5.5032309  |
| H  | 0.5972665  | 9.0851310  | 6.9520247  |
| H  | 0.3409555  | 10.7392955 | 6.3639499  |
| H  | 4.0608905  | 6.2892288  | 2.4218255  |
| H  | 1.3958892  | 6.5524585  | 2.0844139  |
| H  | 4.9765050  | 6.2239972  | 6.2481946  |
| H  | 5.1207046  | 4.7405460  | 5.2860131  |
| H  | 5.7347120  | 6.2709810  | 4.6310265  |
| H  | 3.5216640  | 9.7602915  | 2.3128678  |

Model <sup>solvent</sup>:

|    |           |             |            |
|----|-----------|-------------|------------|
| O  | 7.1163636 | -4.8894105  | -1.3347703 |
| C  | 4.7472357 | -0.8312749  | -0.0001153 |
| Fe | 5.4903777 | -2.5274614  | -0.5278671 |
| C  | 6.6370441 | -1.6163666  | -1.6445590 |
| N  | 7.3579652 | -1.0242018  | -2.3664818 |
| C  | 6.2364382 | -4.1595034  | -1.0879495 |
| Ni | 4.1814910 | -4.7346017  | -1.3217599 |
| S  | 4.3494990 | -5.9489765  | -3.2126447 |
| C  | 4.4248222 | -7.3416263  | -2.1659960 |
| N  | 4.5464382 | -8.6019920  | -2.5719260 |
| C  | 4.6095219 | -9.7182174  | -1.6048918 |
| C  | 6.0448103 | -10.1028397 | -1.2442362 |



|    |            |             |            |
|----|------------|-------------|------------|
| N  | 4.3238762  | 0.2150602   | 0.3270066  |
| S  | 4.2980112  | -6.8290525  | -0.5045864 |
| S  | 3.8341537  | -3.7509082  | 0.6631360  |
| C  | 2.2525573  | -2.7795113  | 0.6245556  |
| C  | 1.5533444  | -2.7242544  | -0.7276502 |
| C  | 2.3224252  | -1.9710773  | -1.8054862 |
| S  | 3.9253924  | -2.7461162  | -2.3314740 |
| C  | 4.6224477  | -8.9437393  | -4.0078232 |
| C  | 3.2580450  | -9.2924737  | -4.6033927 |
| C  | 6.5401985  | -2.4794250  | 0.8893638  |
| O  | 7.2160199  | -2.4394459  | 1.8302756  |
| H  | 2.5567159  | -0.9471177  | -1.4840233 |
| H  | 1.7357141  | -1.9269370  | -2.7329863 |
| H  | 1.3187118  | -3.7437241  | -1.0730383 |
| H  | 0.5896049  | -2.2049334  | -0.5829876 |
| H  | 1.6166092  | -3.2860434  | 1.3630966  |
| H  | 2.4898335  | -1.7717819  | 0.9914708  |
| H  | 4.0473317  | -9.4198888  | -0.7094063 |
| H  | 4.0767881  | -10.5648159 | -2.0595235 |
| H  | 6.0290102  | -10.9493420 | -0.5434177 |
| H  | 6.6156885  | -10.4090520 | -2.1320832 |
| H  | 6.5666431  | -9.2653773  | -0.7618436 |
| H  | 5.0718393  | -8.0894691  | -4.5322152 |
| H  | 5.3192516  | -9.7885821  | -4.0975504 |
| H  | 3.3806842  | -9.5580365  | -5.6628323 |
| H  | 2.8016957  | -10.1501976 | -4.0898684 |
| H  | 2.5714383  | -8.4376918  | -4.5390941 |
| C  | 8.1379908  | -0.3452008  | -3.2655281 |
| C  | 7.7249598  | 0.8163965   | -4.0197365 |
| C  | 8.7994147  | 1.1344410   | -4.9104627 |
| C  | 9.8628786  | 0.1946355   | -4.6941831 |
| C  | 9.4782578  | -0.7314367  | -3.6665151 |
| Fe | 9.4289088  | 1.2062929   | -2.9531402 |
| C  | 10.2355944 | -1.9310428  | -3.1903975 |
| H  | 11.3179489 | -1.7747993  | -3.2888797 |
| H  | 10.0155727 | -2.1583095  | -2.1386120 |
| H  | 9.9693527  | -2.8199383  | -3.7861509 |
| C  | 10.7474549 | 1.3132919   | -1.3736033 |
| C  | 9.4311211  | 1.6891947   | -0.9295052 |
| C  | 9.0204563  | 2.8137199   | -1.7278733 |
| C  | 10.0755793 | 3.1331688   | -2.6471681 |
| C  | 11.1469739 | 2.2022059   | -2.4278148 |
| C  | 8.6584129  | 1.0649538   | 0.1914588  |
| H  | 8.9362735  | 0.0112368   | 0.3299311  |
| H  | 8.8663405  | 1.5880270   | 1.1395948  |
| H  | 7.5749343  | 1.1167827   | 0.0166868  |
| H  | 6.7693949  | 1.3245404   | -3.9267975 |
| H  | 8.8149735  | 1.9661647   | -5.6100664 |
| H  | 10.8235969 | 0.1933018   | -5.2037887 |
| H  | 11.3304334 | 0.4818156   | -0.9838536 |
| H  | 12.0830144 | 2.1623638   | -2.9792616 |
| H  | 10.0564166 | 3.9226523   | -3.3946219 |
| H  | 8.0608926  | 3.3205021   | -1.6556628 |

Model <sup>solv</sup>[c]<sup>+</sup>:

|    |           |            |            |
|----|-----------|------------|------------|
| O  | 7.1367627 | -4.8851007 | -1.4361735 |
| C  | 4.7030835 | -0.8841335 | -0.0554520 |
| Fe | 5.4502403 | -2.5748375 | -0.5916110 |
| C  | 6.5780507 | -1.6302984 | -1.6767154 |
| N  | 7.2976308 | -1.0036321 | -2.3739908 |
| C  | 6.2522241 | -4.1772273 | -1.1644375 |

|    |            |             |            |
|----|------------|-------------|------------|
| Ni | 4.1776596  | -4.7601341  | -1.3405191 |
| S  | 4.2887776  | -5.9721949  | -3.2259138 |
| C  | 4.4210729  | -7.3649297  | -2.1793833 |
| N  | 4.5543320  | -8.6180341  | -2.5873736 |
| C  | 4.6631666  | -9.7353220  | -1.6222832 |
| C  | 6.1145572  | -10.0964614 | -1.3067947 |
| N  | 4.2814937  | 0.1619520   | 0.2703424  |
| S  | 4.3325029  | -6.8474655  | -0.5148846 |
| S  | 3.8351450  | -3.7845919  | 0.6500408  |
| C  | 2.2380858  | -2.8417301  | 0.6119291  |
| C  | 1.5298193  | -2.8072292  | -0.7354707 |
| C  | 2.2717242  | -2.0435125  | -1.8242964 |
| S  | 3.8838425  | -2.7850870  | -2.3665160 |
| C  | 4.6029702  | -8.9599747  | -4.0269074 |
| C  | 3.2336127  | -9.3469620  | -4.5854880 |
| C  | 6.5001312  | -2.5331806  | 0.8505262  |
| O  | 7.1691028  | -2.4917182  | 1.7896742  |
| H  | 2.4893548  | -1.0121445  | -1.5154216 |
| H  | 1.6785667  | -2.0202110  | -2.7481641 |
| H  | 1.3079407  | -3.8313913  | -1.0737197 |
| H  | 0.5591332  | -2.3044054  | -0.5844132 |
| H  | 1.6203634  | -3.3596879  | 1.3577070  |
| H  | 2.4615192  | -1.8302098  | 0.9770783  |
| H  | 4.1214179  | -9.4470639  | -0.7110187 |
| H  | 4.1304835  | -10.5877350 | -2.0651043 |
| H  | 6.1305352  | -10.9481027 | -0.6126427 |
| H  | 6.6642752  | -10.3882019 | -2.2124615 |
| H  | 6.6369523  | -9.2549599  | -0.8322299 |
| H  | 5.0171719  | -8.0952631  | -4.5628824 |
| H  | 5.3201697  | -9.7856126  | -4.1303013 |
| H  | 3.3397916  | -9.6069469  | -5.6478277 |
| H  | 2.8158974  | -10.2191706 | -4.0639559 |
| H  | 2.5234323  | -8.5132543  | -4.5034048 |
| C  | 8.0760829  | -0.3356569  | -3.2747886 |
| C  | 7.7160009  | 0.8879039   | -3.9430481 |
| C  | 8.7938092  | 1.2047080   | -4.8300580 |
| C  | 9.8124200  | 0.2049341   | -4.6739440 |
| C  | 9.3837823  | -0.7618770  | -3.7067768 |
| Fe | 9.4785972  | 1.2169975   | -2.8884765 |
| C  | 10.0967708 | -2.0032709  | -3.2838730 |
| H  | 11.1817333 | -1.8935041  | -3.4007667 |
| H  | 9.8790641  | -2.2655447  | -2.2406574 |
| H  | 9.7750678  | -2.8473188  | -3.9149670 |
| C  | 10.7263606 | 1.2610199   | -1.1976653 |
| C  | 9.4836495  | 1.8811314   | -0.8405264 |
| C  | 9.2777425  | 2.9700194   | -1.7499431 |
| C  | 10.3995640 | 3.0443460   | -2.6402274 |
| C  | 11.3010041 | 1.9798760   | -2.2972168 |
| C  | 8.5740055  | 1.4695741   | 0.2713676  |
| H  | 8.6983531  | 0.4085537   | 0.5228706  |
| H  | 8.8163227  | 2.0515646   | 1.1752844  |
| H  | 7.5203424  | 1.6628213   | 0.0312308  |
| H  | 6.7861059  | 1.4331518   | -3.8103930 |
| H  | 8.8341883  | 2.0620514   | -5.4958215 |
| H  | 10.7649676 | 0.1780336   | -5.1965844 |
| H  | 11.1523083 | 0.3834272   | -0.7172732 |
| H  | 12.2421834 | 1.7518367   | -2.7900992 |
| H  | 10.5340082 | 3.7667140   | -3.4408766 |
| H  | 8.4057589  | 3.6192277   | -1.7678362 |

Model<sup>solv</sup>[c']<sup>+</sup>-H<sub>2</sub>:

|    |            |           |            |
|----|------------|-----------|------------|
| C  | 0.2562092  | 7.6225147 | -0.3364860 |
| C  | 0.8101583  | 6.7347788 | 0.6412154  |
| C  | -0.2456876 | 5.9428178 | 1.1993317  |
| C  | -1.4605561 | 6.3333572 | 0.5392534  |
| C  | -1.1576844 | 7.3774851 | -0.3987817 |
| Fe | -0.1311932 | 5.6755016 | -0.9178699 |

|    |            |            |            |
|----|------------|------------|------------|
| C  | 1.2952230  | 4.4788675  | -1.9673226 |
| C  | 0.2282313  | 3.6652238  | -1.4394190 |
| C  | -1.0374733 | 4.1268284  | -1.9497949 |
| C  | -0.7514713 | 5.2206654  | -2.8265754 |
| C  | 0.6680574  | 5.4393055  | -2.8254354 |
| N  | 0.3934289  | 2.6003010  | -0.5966288 |
| C  | 0.4480009  | 1.6349592  | 0.0789824  |
| Fe | 0.4594943  | 0.1092441  | 1.1136950  |
| C  | 1.1883761  | 0.8026886  | 2.5937603  |
| O  | 1.6340159  | 1.2340546  | 3.5658204  |
| C  | 2.7564488  | 4.2965345  | -1.7180420 |
| C  | -0.1127512 | 4.9121124  | 2.2740516  |
| C  | -1.1998983 | 0.8127318  | 1.8039218  |
| N  | -2.1614181 | 1.3338549  | 2.2300073  |
| C  | 2.0957861  | -0.3110249 | 0.4655814  |
| O  | 3.1770935  | -0.4213006 | 0.0768983  |
| Ni | 0.1770594  | -3.1099956 | 0.1510933  |
| S  | -0.6444852 | -1.1362020 | -0.5890862 |
| C  | -2.3892659 | -1.3858130 | 0.0236110  |
| C  | -2.5311412 | -2.3883097 | 1.1689125  |
| C  | -1.6939592 | -2.1527066 | 2.4258639  |
| S  | 0.1412024  | -2.0065924 | 2.1254510  |
| S  | -0.2759456 | -4.3659261 | -1.6854441 |
| C  | 0.0659942  | -5.7482801 | -0.6753756 |
| S  | 0.4620999  | -5.2244246 | 0.9428284  |
| N  | 0.0279792  | -7.0115874 | -1.0782643 |
| C  | -0.3320651 | -7.3679103 | -2.4686306 |
| C  | -1.8197366 | -7.6813243 | -2.6280175 |
| C  | 0.3438188  | -8.1257808 | -0.1573691 |
| C  | 1.8086186  | -8.5560198 | -0.2400668 |
| H  | -2.7752931 | -0.3939648 | 0.2837408  |
| H  | -2.9291248 | -1.7584701 | -0.8573284 |
| H  | -2.3164467 | -3.3993357 | 0.7840015  |
| H  | -3.5918716 | -2.3932331 | 1.4741194  |
| H  | -1.7855726 | -3.0196057 | 3.0938688  |
| H  | -1.9957978 | -1.2517779 | 2.9714492  |
| H  | 0.0851961  | -7.8046683 | 0.8605515  |
| H  | -0.3271643 | -8.9546090 | -0.4216963 |
| H  | 1.9765293  | -9.3981032 | 0.4455312  |
| H  | 2.0758790  | -8.8865056 | -1.2535382 |
| H  | 2.4776208  | -7.7350485 | 0.0510989  |
| H  | -0.0342226 | -6.5329294 | -3.1170669 |
| H  | 0.2853149  | -8.2343615 | -2.7425011 |
| H  | -2.0198890 | -7.9602496 | -3.6718803 |
| H  | -2.1263254 | -8.5209042 | -1.9887158 |
| H  | -2.4361552 | -6.8065105 | -2.3808645 |
| H  | 3.2995605  | 5.2398515  | -1.8530709 |
| H  | 2.9553107  | 3.9189559  | -0.7063459 |
| H  | 3.1676921  | 3.5666639  | -2.4340323 |
| H  | 0.9030073  | 4.4977715  | 2.3097230  |
| H  | -0.3148044 | 5.3737725  | 3.2542213  |
| H  | -0.8319412 | 4.0917190  | 2.1453331  |
| H  | -2.0086773 | 3.6975277  | -1.7222416 |
| H  | -1.4864463 | 5.7919248  | -3.3864155 |
| H  | 1.1938074  | 6.2130163  | -3.3790471 |
| H  | 1.8629482  | 6.6513110  | 0.9015329  |
| H  | 0.8100225  | 8.3392053  | -0.9369584 |
| H  | -1.8687555 | 7.8804541  | -1.0486848 |
| H  | -2.4427302 | 5.9026397  | 0.7191267  |
| H  | 2.2024113  | -3.1295063 | 0.0175525  |
| H  | 2.0210388  | -2.8608151 | -0.6799049 |

|    |            |            |            |
|----|------------|------------|------------|
| C  | 3.5877600  | 4.7087327  | 3.8330537  |
| C  | 3.7661946  | 5.1005678  | 5.2197873  |
| C  | 5.0456560  | 5.7573454  | 5.3712663  |
| C  | 5.6818327  | 5.7282059  | 4.0893323  |
| C  | 4.7959300  | 5.0908763  | 3.1570224  |
| Fe | 3.9000194  | 6.7442547  | 3.9876304  |
| C  | 3.4019545  | 7.9821197  | 2.4212771  |
| C  | 4.3597149  | 8.6364367  | 3.2748649  |
| C  | 3.7696292  | 8.7161084  | 4.5859833  |
| C  | 2.4659787  | 8.1205974  | 4.5385358  |
| C  | 2.2371377  | 7.6626794  | 3.1979876  |
| C  | 5.6859837  | 9.1995386  | 2.8590122  |
| N  | 2.8698919  | 4.8745409  | 6.2208248  |
| C  | 2.2293611  | 4.4742266  | 7.1450431  |
| Fe | 0.7947610  | 4.6228002  | 8.4489343  |
| C  | -0.3876805 | 4.9923690  | 7.1833422  |
| O  | -1.1725113 | 5.2287972  | 6.3654413  |
| C  | 2.4315896  | 3.9430332  | 3.2719384  |
| Ni | 2.6607525  | 2.6169727  | 8.1838541  |
| S  | 3.1537301  | 1.2313562  | 6.4771473  |
| C  | 4.8239728  | 1.4885626  | 6.9028470  |
| N  | 5.8638630  | 0.8972566  | 6.3194294  |
| C  | 7.2495856  | 1.1691406  | 6.7532649  |
| C  | 7.9348402  | 2.2386385  | 5.9019307  |
| S  | 4.9133685  | 2.6102439  | 8.2341589  |
| S  | 2.3871799  | 3.8335288  | 10.0472979 |
| C  | 1.4223816  | 2.7549112  | 11.3009150 |
| N  | 0.9199286  | 1.5089894  | 10.8200769 |
| C  | -0.0811195 | 1.5553900  | 9.8044556  |
| S  | 0.4422653  | 2.2838639  | 8.1117855  |
| C  | 5.6756445  | -0.0725261 | 5.2206220  |
| C  | 5.5973042  | -1.5171860 | 5.7163686  |
| C  | -0.5962654 | 4.7210441  | 9.7742564  |
| N  | -1.4568411 | 4.8175656  | 10.5691733 |
| C  | 1.2328745  | 6.3013503  | 8.8030446  |
| O  | 1.5088327  | 7.3988940  | 9.0480608  |
| H  | 4.9877654  | 4.9412378  | 2.0970007  |
| H  | 6.6588582  | 6.1447985  | 3.8587372  |
| H  | 1.3486260  | 7.1495113  | 2.8383042  |
| H  | 3.5507640  | 7.7490514  | 1.3692608  |
| H  | -0.9321397 | 2.1645905  | 10.1304889 |
| H  | -0.4072242 | 0.5409314  | 9.5506489  |
| H  | 1.6665318  | 0.8465426  | 10.6010096 |
| H  | 2.1526961  | 2.5833038  | 12.0990570 |
| H  | 0.6025246  | 3.3893607  | 11.6570871 |
| H  | 7.2170310  | 1.4715760  | 7.8088437  |
| H  | 7.7942366  | 0.2162121  | 6.7013156  |
| H  | 8.9634102  | 2.3852150  | 6.2606780  |
| H  | 7.9844846  | 1.9424262  | 4.8446776  |
| H  | 7.4026244  | 3.1966208  | 5.9726535  |
| H  | 4.7594674  | 0.2044447  | 4.6811485  |
| H  | 6.5180478  | 0.0614496  | 4.5282244  |
| H  | 5.4789082  | -2.1914363 | 4.8564855  |
| H  | 6.5113528  | -1.8092124 | 6.2524983  |
| H  | 4.7373356  | -1.6565140 | 6.3850449  |
| H  | 1.4870978  | 4.2218912  | 3.7584434  |
| H  | 2.3293848  | 4.1239334  | 2.1936139  |
| H  | 2.5737332  | 2.8603546  | 3.4234180  |
| H  | 4.2461487  | 9.1388269  | 5.4676166  |
| H  | 1.7849837  | 8.0072176  | 5.3778972  |
| H  | 6.1222389  | 8.6284230  | 2.0280753  |
| H  | 5.5729922  | 10.2432014 | 2.5208784  |
| H  | 6.4019862  | 9.1986105  | 3.6927124  |
| H  | 5.4399820  | 6.1643812  | 6.2975308  |

Model <sup>solv</sup>d<sup>+</sup>:

|    |            |            |            |
|----|------------|------------|------------|
| C  | 4.3169245  | 8.7837333  | 3.3509928  |
| C  | 3.6572507  | 8.6989654  | 4.6326941  |
| C  | 2.3894044  | 8.0189153  | 4.4762471  |
| C  | 2.2427977  | 7.7372782  | 3.0794717  |
| C  | 3.4234586  | 8.1905852  | 2.4043701  |
| Fe | 3.8717222  | 6.7337789  | 3.8427819  |
| C  | 4.5280280  | 4.9843261  | 2.8403346  |
| C  | 3.4444495  | 4.6731457  | 3.7291392  |
| C  | 3.8660103  | 5.0625068  | 5.0529717  |
| C  | 5.2026750  | 5.5818865  | 4.9675418  |
| C  | 5.6047156  | 5.5357589  | 3.5982219  |
| C  | 2.1554067  | 4.0075417  | 3.3651827  |
| N  | 4.1710932  | 9.1526678  | 5.8038806  |
| C  | 4.4826668  | 9.8018604  | 6.7623377  |
| Fe | 5.4372099  | 10.0818690 | 8.4077410  |
| C  | 6.9392455  | 9.4561370  | 7.6794186  |
| O  | 7.9188941  | 9.0536283  | 7.2217356  |
| C  | 5.6348157  | 9.4281994  | 3.0781789  |
| Ni | 3.8250674  | 11.7879477 | 7.1874773  |
| S  | 3.8184875  | 12.7216244 | 5.1372090  |
| C  | 2.0858620  | 12.5060039 | 5.1785560  |
| N  | 1.2369424  | 12.9268894 | 4.2513950  |
| C  | -0.2207780 | 12.7102334 | 4.3861094  |
| C  | -0.6958390 | 11.4460603 | 3.6701313  |
| S  | 1.6423280  | 11.6938431 | 6.6584464  |
| S  | 3.5149553  | 11.1477426 | 9.3144240  |
| C  | 4.1426840  | 12.5646210 | 10.4538166 |
| N  | 4.7811655  | 13.6604612 | 9.8142435  |
| C  | 6.0208167  | 13.4194628 | 9.1640540  |
| S  | 5.9750074  | 12.2657669 | 7.6251437  |
| C  | 1.7056782  | 13.6555042 | 3.0512405  |
| C  | 1.6452149  | 15.1725047 | 3.2279322  |
| C  | 6.4208529  | 10.3482980 | 10.0425289 |
| N  | 7.0363296  | 10.4770527 | 11.0339106 |
| C  | 4.8520764  | 8.5245990  | 9.0490751  |
| O  | 4.4751170  | 7.5196007  | 9.4718723  |
| H  | 3.6276174  | 8.0875884  | 1.3414852  |
| H  | 1.3879317  | 7.2519303  | 2.6166134  |
| H  | 6.5474116  | 5.8975298  | 3.1956589  |
| H  | 4.5134853  | 4.8567672  | 1.7603449  |
| H  | 6.7369164  | 12.9463823 | 9.8459643  |
| H  | 6.4280280  | 14.3498249 | 8.7548918  |
| H  | 3.2260400  | 12.8931201 | 10.9547069 |
| H  | 4.8199978  | 12.0734649 | 11.1617386 |
| H  | -0.4565010 | 12.6676302 | 5.4581236  |
| H  | -0.7119943 | 13.6032221 | 3.9769943  |
| H  | -1.7852302 | 11.3561855 | 3.7819665  |
| H  | -0.4674577 | 11.4798790 | 2.5958651  |
| H  | -0.2318228 | 10.5494035 | 4.1027386  |
| H  | 2.7313563  | 13.3263678 | 2.8367282  |
| H  | 1.0732072  | 13.3283689 | 2.2147450  |
| H  | 1.9838883  | 15.6568279 | 2.3015827  |
| H  | 0.6215642  | 15.5144240 | 3.4340140  |
| H  | 2.2984034  | 15.5003191 | 4.0476097  |
| H  | 6.3451155  | 9.2748927  | 3.9011466  |
| H  | 6.0786316  | 9.0421310  | 2.1526220  |
| H  | 5.4975189  | 10.5153621 | 2.9597209  |
| H  | 3.2747189  | 4.9581639  | 5.9589750  |
| H  | 5.7975714  | 5.9626573  | 5.7939000  |
| H  | 1.8674569  | 4.2245487  | 2.3285382  |
| H  | 2.2696932  | 2.9151964  | 3.4563063  |
| H  | 1.3396059  | 4.3109371  | 4.0340270  |
| H  | 1.6773941  | 7.8191679  | 5.2711860  |
| H  | 4.1419783  | 14.2377221 | 9.2658711  |

Model <sup>solv</sup>d<sup>+</sup>-2H:

|    |            |            |            |
|----|------------|------------|------------|
| C  | 3.4301909  | 4.8415044  | 3.6020401  |
| C  | 3.6991167  | 5.1026376  | 4.9923793  |
| C  | 4.9993884  | 5.6963551  | 5.1014588  |
| C  | 5.5464567  | 5.8154965  | 3.7814159  |
| C  | 4.5805260  | 5.2886597  | 2.8598583  |
| Fe | 3.7756350  | 6.8630975  | 3.9134442  |
| C  | 3.5876013  | 8.7281278  | 4.7256161  |
| C  | 2.2943725  | 8.0873583  | 4.6206661  |
| C  | 2.0841550  | 7.8194176  | 3.2317043  |
| C  | 3.2362748  | 8.2621295  | 2.5000123  |
| C  | 4.1970600  | 8.8190330  | 3.4091912  |
| C  | 5.4952278  | 9.4813993  | 3.0737581  |
| N  | 4.1445500  | 9.1988763  | 5.8812650  |
| C  | 4.5958892  | 9.6824684  | 6.8587831  |
| Ni | 3.7429496  | 12.2633720 | 7.3587335  |
| S  | 1.6003352  | 12.0060744 | 6.7599580  |
| C  | 2.0676696  | 12.6042458 | 5.1896060  |
| N  | 1.2392358  | 12.8620527 | 4.1864172  |
| C  | 1.7339015  | 13.4151973 | 2.9066723  |
| C  | 1.6437169  | 14.9401752 | 2.8541108  |
| C  | 2.2181365  | 4.1606724  | 3.0417080  |
| Fe | 5.5386092  | 10.0532393 | 8.4753053  |
| S  | 3.6124563  | 11.1272809 | 9.3537578  |
| C  | 4.2258854  | 12.3818873 | 10.5611149 |
| N  | 4.8733478  | 13.5544388 | 9.8935257  |
| C  | 6.1732292  | 13.3108908 | 9.1973396  |
| S  | 5.9786836  | 12.2525943 | 7.6962619  |
| C  | 6.5218044  | 10.3611962 | 10.0937293 |
| N  | 7.1325544  | 10.5374336 | 11.0811058 |
| C  | 5.0098618  | 8.4893633  | 9.1568875  |
| O  | 4.6635160  | 7.4879529  | 9.6089150  |
| C  | 7.0517097  | 9.4290440  | 7.7621057  |
| O  | 8.0366943  | 9.0308751  | 7.3159505  |
| S  | 3.7923438  | 12.8483017 | 5.1693587  |
| C  | -0.2147407 | 12.6191829 | 4.3055952  |
| C  | -0.6346415 | 11.2688910 | 3.7252853  |
| H  | 3.3817703  | 8.1664137  | 1.4267715  |
| H  | 1.2093240  | 7.3325407  | 2.8089941  |
| H  | 6.5109109  | 6.2447318  | 3.5226359  |
| H  | 4.6846435  | 5.2531292  | 1.7778545  |
| H  | 6.8809666  | 12.8461892 | 9.8914887  |
| H  | 6.5391177  | 14.2841189 | 8.8541461  |
| H  | 4.9858086  | 14.3195205 | 10.5743637 |
| H  | 3.3481985  | 12.7646656 | 11.0925187 |
| H  | 4.9343005  | 11.9206312 | 11.2563449 |
| H  | -0.4798204 | 12.6901841 | 5.3696444  |
| H  | -0.7186566 | 13.4459663 | 3.7869283  |
| H  | -1.7224769 | 11.1543825 | 3.8294536  |
| H  | -0.3877171 | 11.1934722 | 2.6572404  |
| H  | -0.1475447 | 10.4413296 | 4.2581122  |
| H  | 2.7718176  | 13.0795774 | 2.7741975  |
| H  | 1.1353270  | 12.9558630 | 2.1084045  |
| H  | 2.0014619  | 15.2889920 | 1.8755558  |
| H  | 0.6086354  | 15.2873488 | 2.9789566  |
| H  | 2.2662243  | 15.3995581 | 3.6335287  |
| H  | 6.2434892  | 9.3384626  | 3.8653450  |
| H  | 5.9065228  | 9.0796049  | 2.1388994  |
| H  | 5.3542519  | 10.5667822 | 2.9417186  |
| H  | 3.0193095  | 4.8969387  | 5.8157675  |
| H  | 5.4748415  | 6.0257689  | 6.0219224  |
| H  | 2.0143102  | 4.4859201  | 2.0124316  |
| H  | 2.3693362  | 3.0686679  | 3.0207109  |
| H  | 1.3269271  | 4.3593348  | 3.6524305  |
| H  | 1.6190696  | 7.8822611  | 5.4459137  |
| H  | 3.4466924  | 13.7288841 | 7.8841691  |
| H  | 4.1876120  | 13.8656653 | 9.1177658  |

Model <sup>solv</sup>e:

|    |            |            |            |
|----|------------|------------|------------|
| C  | 5.5355541  | 5.6395104  | 4.2217951  |
| C  | 4.5479447  | 5.1179350  | 3.3136288  |
| C  | 3.3198566  | 4.9259392  | 4.0511830  |
| C  | 3.5942924  | 5.3104687  | 5.4261685  |
| C  | 4.9568983  | 5.7787063  | 5.5215841  |
| Fe | 3.9094845  | 6.8926956  | 4.1529873  |
| C  | 2.4414446  | 8.3130544  | 4.4475963  |
| C  | 2.5636727  | 8.0042517  | 3.0524070  |
| C  | 3.9072367  | 8.3090555  | 2.6510506  |
| C  | 4.6274631  | 8.8068159  | 3.7930901  |
| C  | 3.7107948  | 8.8028668  | 4.9040530  |
| H  | 1.7833831  | 7.5909855  | 2.4181206  |
| C  | 6.0422515  | 9.3027582  | 3.8102167  |
| C  | 2.0111488  | 4.3797306  | 3.5559226  |
| N  | 1.7768138  | 2.9823729  | 3.9544466  |
| C  | 0.4114615  | 2.5781624  | 3.6294528  |
| N  | 2.7058820  | 5.2624202  | 6.4560150  |
| C  | 2.0569166  | 5.1006212  | 7.4440057  |
| Ni | 2.4123556  | 3.5923424  | 8.9366827  |
| S  | 4.6602503  | 3.5901083  | 9.1342256  |
| C  | 4.6143540  | 2.1147927  | 8.2043448  |
| N  | 5.6640231  | 1.3378803  | 7.9404228  |
| C  | 7.0214383  | 1.6863725  | 8.4049916  |
| C  | 7.8481615  | 2.3964817  | 7.3321340  |
| C  | 2.7479747  | 2.0657689  | 3.3656369  |
| Fe | 0.5721326  | 5.6018376  | 8.6135285  |
| C  | -0.8850063 | 6.0354827  | 9.7904297  |
| N  | -1.7897760 | 6.3374668  | 10.4775907 |
| S  | 0.1902687  | 3.2597619  | 8.8357099  |
| C  | -0.4534862 | 2.9478924  | 10.5491245 |
| C  | 0.5651773  | 3.1232289  | 11.6688502 |
| C  | 1.0737070  | 4.5477843  | 11.8532882 |
| S  | 2.0644626  | 5.2247660  | 10.4357079 |
| S  | 2.9795371  | 1.7915405  | 7.7100903  |
| C  | 1.0478705  | 7.3063294  | 8.5754520  |
| O  | 1.3510941  | 8.4241550  | 8.5680316  |
| C  | -0.5294615 | 5.6828744  | 7.2312659  |
| O  | -1.2609859 | 5.7423433  | 6.3349331  |
| C  | 5.5063928  | 0.0732327  | 7.1935730  |
| C  | 5.2734764  | -1.1280088 | 8.1117915  |
| C  | 4.7880741  | 4.7920734  | 1.8698590  |
| H  | 6.5534881  | 5.9117886  | 3.9516058  |
| H  | 4.3245547  | 8.1638346  | 1.6569884  |
| H  | -1.3197284 | 3.6086573  | 10.6894971 |
| H  | -0.8041287 | 1.9074361  | 10.5141507 |
| H  | 1.4150756  | 2.4395426  | 11.5125629 |
| H  | 0.0785433  | 2.8193907  | 12.6123612 |
| H  | 1.7652694  | 4.5980445  | 12.7053019 |
| H  | 0.2464922  | 5.2492193  | 12.0271940 |
| H  | 6.9178897  | 2.3168407  | 9.2983027  |
| H  | 7.5043268  | 0.7499500  | 8.7181056  |
| H  | 8.8503257  | 2.6133851  | 7.7279627  |
| H  | 7.9653698  | 1.7730015  | 6.4349930  |
| H  | 7.3793697  | 3.3460819  | 7.0402247  |
| H  | 4.6671515  | 0.1982668  | 6.4954241  |
| H  | 6.4166686  | -0.0608645 | 6.5933328  |
| H  | 5.1801016  | -2.0396514 | 7.5048379  |
| H  | 6.1106700  | -1.2698607 | 8.8098015  |
| H  | 4.3489422  | -1.0031178 | 8.6912598  |
| H  | 1.9605859  | 4.5034610  | 2.4493774  |
| H  | 3.9518246  | 9.1048940  | 5.9204988  |
| H  | 1.5517045  | 8.1734960  | 5.0563328  |
| H  | 6.6504659  | 8.8071105  | 3.0413546  |
| H  | 6.0733138  | 10.3871568 | 3.6112866  |
| H  | 6.5154188  | 9.1331224  | 4.7873885  |
| H  | 5.4341713  | 6.1472433  | 6.4245611  |
| H  | 1.1881040  | 4.9763859  | 3.9776400  |
| H  | 2.5576317  | 1.0470532  | 3.7324124  |

|   |            |           |           |
|---|------------|-----------|-----------|
| H | 2.7035293  | 2.0461732 | 2.2518777 |
| H | 3.7645659  | 2.3514631 | 3.6661704 |
| H | 0.2346874  | 1.5557545 | 3.9924196 |
| H | -0.3056042 | 3.2473106 | 4.1255266 |
| H | 0.2011681  | 2.5957959 | 2.5350847 |
| H | 5.1088813  | 3.7433858 | 1.7537787 |
| H | 3.8830290  | 4.9286377 | 1.2630513 |
| H | 5.5797259  | 5.4291904 | 1.4523739 |

Model<sup>solv</sup>e<sup>+</sup>:

|    |            |            |            |
|----|------------|------------|------------|
| C  | 5.5246638  | 5.7194584  | 4.1126596  |
| C  | 4.5252408  | 5.1548208  | 3.2482128  |
| C  | 3.3343460  | 4.9377285  | 4.0260014  |
| C  | 3.6357993  | 5.3427093  | 5.3816591  |
| C  | 4.9836936  | 5.8640184  | 5.4299686  |
| Fe | 3.8933501  | 6.9886143  | 4.0987142  |
| C  | 2.3841171  | 8.3827603  | 4.3471809  |
| C  | 2.5528867  | 8.1192558  | 2.9497163  |
| C  | 3.8879430  | 8.4823343  | 2.5923758  |
| C  | 4.5616660  | 8.9797374  | 3.7554926  |
| C  | 3.6274016  | 8.9014666  | 4.8480332  |
| H  | 1.8065785  | 7.6941348  | 2.2836500  |
| C  | 5.9564130  | 9.5152808  | 3.8172784  |
| C  | 2.0198564  | 4.3670266  | 3.5743116  |
| N  | 1.8343625  | 2.9727090  | 4.0044069  |
| C  | 0.4591737  | 2.5309662  | 3.7785568  |
| N  | 2.7792875  | 5.2844028  | 6.4297160  |
| C  | 2.1061038  | 5.1351729  | 7.4048127  |
| Ni | 2.4364553  | 3.5854105  | 8.8730298  |
| S  | 4.6858275  | 3.5809629  | 9.0702150  |
| C  | 4.6188579  | 2.0745993  | 8.1899119  |
| N  | 5.6423443  | 1.2547524  | 7.9925068  |
| C  | 6.9998473  | 1.5757669  | 8.4857687  |
| C  | 7.8827653  | 2.2012339  | 7.4057390  |
| C  | 2.8000973  | 2.0555181  | 3.4038187  |
| Fe | 0.6434167  | 5.5992974  | 8.5868398  |
| C  | -0.8080686 | 6.0362866  | 9.7637720  |
| N  | -1.7032490 | 6.3279298  | 10.4654476 |
| S  | 0.2093159  | 3.2747791  | 8.7574579  |
| C  | -0.4298059 | 2.9203204  | 10.4627955 |
| C  | 0.5899232  | 3.0591571  | 11.5858277 |
| C  | 1.1094616  | 4.4734650  | 11.8093475 |
| S  | 2.1033393  | 5.1883162  | 10.4142269 |
| S  | 2.9803286  | 1.7759265  | 7.6662127  |
| C  | 1.1271512  | 7.3125285  | 8.5948430  |
| O  | 1.4325707  | 8.4259896  | 8.6160859  |
| C  | -0.4830108 | 5.7279832  | 7.2158679  |
| O  | -1.2274314 | 5.8216762  | 6.3375250  |
| C  | 5.4641156  | -0.0429967 | 7.3032371  |
| C  | 5.1965247  | -1.1903145 | 8.2783335  |
| C  | 4.7194504  | 4.8306377  | 1.7997903  |
| H  | 6.5301652  | 6.0015519  | 3.8099067  |
| H  | 4.3362687  | 8.3655346  | 1.6082642  |
| H  | -1.2933381 | 3.5812888  | 10.6169662 |
| H  | -0.7843984 | 1.8832392  | 10.3945861 |
| H  | 1.4317968  | 2.3682605  | 11.4199698 |
| H  | 0.0965734  | 2.7390113  | 12.5196272 |
| H  | 1.8068189  | 4.4949951  | 12.6575210 |
| H  | 0.2910248  | 5.1791518  | 12.0047474 |
| H  | 6.8934114  | 2.2497151  | 9.3462127  |
| H  | 7.4337806  | 0.6367176  | 8.8549823  |
| H  | 8.8818509  | 2.3902453  | 7.8221111  |
| H  | 7.9971809  | 1.5342122  | 6.5404024  |



|   |            |            |           |
|---|------------|------------|-----------|
| H | 7.4676317  | 3.1580914  | 7.0615591 |
| H | 4.6356758  | 0.0656384  | 6.5900057 |
| H | 6.3784119  | -0.2222271 | 6.7220588 |
| H | 5.0943028  | -2.1272854 | 7.7135273 |
| H | 6.0223941  | -1.3144767 | 8.9925376 |
| H | 4.2674598  | -1.0211452 | 8.8387329 |
| H | 1.9369395  | 4.4714793  | 2.4700320 |
| H | 3.8348872  | 9.1980213  | 5.8730381 |
| H | 1.4778052  | 8.2131907  | 4.9224171 |
| H | 6.5959729  | 9.0686226  | 3.0451320 |
| H | 5.9376207  | 10.6036820 | 3.6442181 |
| H | 6.4127112  | 9.3458202  | 4.8012888 |
| H | 5.4854633  | 6.2419493  | 6.3156425 |
| H | 1.1984777  | 4.9539670  | 4.0107435 |
| H | 2.6375280  | 1.0463058  | 3.8052275 |
| H | 2.7110061  | 2.0064914  | 2.2965017 |
| H | 3.8235543  | 2.3612463  | 3.6579224 |
| H | 0.3332339  | 1.5173192  | 4.1825930 |
| H | -0.2400336 | 3.2005904  | 4.2974989 |
| H | 0.1862938  | 2.5097967  | 2.7012769 |
| H | 5.0580429  | 3.7877883  | 1.6913076 |
| H | 3.7915725  | 4.9386711  | 1.2239998 |
| H | 5.4869223  | 5.4751543  | 1.3525247 |

Model <sup>solv</sup>e<sup>-</sup>-2H:

|    |            |            |            |
|----|------------|------------|------------|
| C  | 3.9881134  | 9.5081219  | 4.1314374  |
| C  | 3.1435616  | 9.7807707  | 5.2614757  |
| C  | 1.7870066  | 9.9142345  | 4.7707150  |
| C  | 1.8387378  | 9.7207792  | 3.3266893  |
| C  | 3.2004670  | 9.4580840  | 2.9388722  |
| Fe | 2.5190479  | 8.0674797  | 4.2834243  |
| C  | 1.5215041  | 6.4158212  | 3.5403521  |
| C  | 1.1940278  | 6.6202772  | 4.9211211  |
| C  | 2.4129039  | 6.5495184  | 5.6768401  |
| C  | 3.5012872  | 6.2994058  | 4.7701245  |
| C  | 2.9378789  | 6.2233553  | 3.4476442  |
| C  | 4.9372215  | 6.0818084  | 5.1397383  |
| C  | 0.5480851  | 10.1951336 | 5.5466912  |
| N  | 0.1223264  | 11.6676062 | 5.5378191  |
| C  | 1.1748938  | 12.5853651 | 6.0706068  |
| N  | 0.7600564  | 9.8312760  | 2.4919269  |
| C  | -0.2194913 | 10.1138816 | 1.8939078  |
| Fe | -1.7327162 | 10.2899562 | 0.8010684  |
| C  | -3.2308393 | 10.3575857 | -0.4053036 |
| N  | -4.1276300 | 10.3205045 | -1.1623005 |
| C  | -0.8833792 | 9.4203503  | -0.5075589 |
| O  | -0.3433244 | 8.8696631  | -1.3651253 |
| C  | -2.5097329 | 8.8654073  | 1.5481553  |
| O  | -3.0302706 | 7.9613105  | 2.0422122  |
| S  | -0.9011232 | 12.4089971 | 0.1302589  |
| Ni | -1.0788561 | 13.2549951 | 2.2721296  |
| S  | -1.7824976 | 14.7500551 | 3.8933952  |
| C  | -0.4539841 | 15.7378309 | 3.3370924  |
| N  | -0.1667295 | 16.9517487 | 3.7958724  |
| C  | 0.9762525  | 17.7276468 | 3.2665431  |
| C  | 2.2377303  | 17.5699006 | 4.1162009  |
| S  | -2.7739506 | 11.7844270 | 2.3349299  |
| C  | -4.0075718 | 12.7624380 | 1.3314825  |
| C  | -3.3871319 | 13.8001852 | 0.3944162  |
| C  | -2.3522244 | 13.3076630 | -0.6181000 |

|   |            |            |            |
|---|------------|------------|------------|
| S | 0.4286616  | 14.9144012 | 2.0758888  |
| C | -0.9977588 | 17.6033503 | 4.8324710  |
| C | -2.0994440 | 18.4789747 | 4.2346917  |
| C | -1.1764097 | 11.8360616 | 6.2641736  |
| C | 3.6115170  | 9.9492337  | 6.6756035  |
| H | 5.0596193  | 9.3312286  | 4.1821441  |
| H | 0.2009461  | 6.8029652  | 5.3241486  |
| H | 2.5050382  | 6.6765399  | 6.7530036  |
| H | -4.6257888 | 12.0324088 | 0.7968620  |
| H | -4.6238478 | 13.2705823 | 2.0853939  |
| H | -2.9379622 | 14.6045805 | 1.0016338  |
| H | -4.2113127 | 14.2674325 | -0.1712550 |
| H | -1.9028258 | 14.1690248 | -1.1300807 |
| H | -2.7878826 | 12.6367571 | -1.3669546 |
| H | 1.1550101  | 17.4016075 | 2.2330357  |
| H | 0.6560209  | 18.7778773 | 3.2286096  |
| H | 3.0383712  | 18.1921328 | 3.6928007  |
| H | 2.0695981  | 17.8941441 | 5.1527006  |
| H | 2.5812730  | 16.5265619 | 4.1235037  |
| H | -1.4260047 | 16.8149842 | 5.4660729  |
| H | -0.3163199 | 18.1972696 | 5.4562994  |
| H | -2.6644878 | 18.9549179 | 5.0481327  |
| H | -1.6840875 | 19.2748031 | 3.6006940  |
| H | -2.7966552 | 17.8784232 | 3.6353155  |
| H | -0.1176648 | 12.3544392 | 3.1045836  |
| H | -0.3113482 | 9.6473159  | 5.1391914  |
| H | 0.6621846  | 9.9180312  | 6.6021431  |
| H | 3.5015205  | 6.0712454  | 2.5303078  |
| H | 0.8258588  | 6.4354917  | 2.7052158  |
| H | 5.2111069  | 6.6430900  | 6.0434022  |
| H | 5.1171609  | 5.0140290  | 5.3472709  |
| H | 5.6129637  | 6.3788230  | 4.3263462  |
| H | 3.5458927  | 9.2681286  | 1.9270220  |
| H | 0.8081611  | 13.6136749 | 5.9870603  |
| H | 1.3630166  | 12.3395282 | 7.1217025  |
| H | 2.0865895  | 12.4645314 | 5.4777350  |
| H | -1.4868864 | 12.8829807 | 6.1821778  |
| H | -1.9284920 | 11.1865271 | 5.8031815  |
| H | -1.0322582 | 11.5611085 | 7.3148915  |
| H | -0.0427936 | 11.9544376 | 4.5162842  |
| H | 3.8830069  | 10.9984334 | 6.8767983  |
| H | 2.8440388  | 9.6560075  | 7.4048774  |
| H | 4.5050228  | 9.3393693  | 6.8627377  |
